# Supplementary material for: WITHDRAWN: Preoperative clinical characteristics scoring system for the Differentiation of Uterine Leiomyosarcoma from Leiomyoma
Source: Research Square preprint supplement (doi:10.21203/rs.3.rs-4213695/v1), 2024-04-10
Supplement: Supplementary file 1 [file 7d90f417500b1d929b3a0da3.xlsx]

## Sheet: Sheet1
病历号	住院号	姓名	手术开始时间	联系电话	联系地址	临床诊断	术前诊刮	冰冻	术后病理检查	标本剖视	免疫组化	ki67	cd10	ER	PR	住院号	送检标本名称	年龄	足	早	留	产	孕	绝经1	主诉（月经改变1，体检2，腹痛3）	主诉（月经改变1，体检2，腹痛3）	手术方式（子宫双附件或双输卵管1，先肌瘤播出2，其他请说明）	身高	体重	BMI	B超检查所得	B超检查所见	AFP	CEA	ca125检验结果	术后病理检查	ca199检验结果	SCC	白细胞检验结果	中性粒绝对值检验结果	单核绝对值	淋巴绝对值	淋巴1.82	淋巴分类	hb	血小板	血小板358	平均血小板体积检验结果	平均血小板体积9.15
330382-0080608720	1589390	陈*玲	2019-05-15 14:24:00						1.“子宫”平滑肌瘤。_x000D_ _x000D_ 2.送检子宫内膜呈分泌反应。_x000D_ _x000D_ 3.“左输卵管系膜囊肿”系膜副中肾管囊肿。							1589390	肌瘤	47	2	0	2	2	4	0	发现盆腔包块6年	2	2	160	51	19.9219	两侧下肢深静脉无明显异常发现	两侧股总静脉、股浅静脉、腘静脉、胫后静脉及小腿肌间静脉丛未见扩张，以上血管内膜面平整, 血流通畅。	2.06	0.7	21.6	1.“子宫”平滑肌瘤。_x000D_ _x000D_ 2.送检子宫内膜呈分泌反应。_x000D_ _x000D_ 3.“左输卵管系膜囊肿”系膜副中肾管囊肿。	8.5	0.6	6.47	4.97	0.41	1.04	0	2	99	414	1	9.7	1
	1259540	马翠英（伴感染）														1259540		58	2	0	0	2	2	1	绝经后阴道出血1月余，加重1天	1	行阴道内肿物摘除术	45	156	18.4911			2.55	4.5	371.7		6.1	3.1	48.48	45.9	1.3	1.7	0	0	40	469	1	6.4	0
330381-8201706873	1379685	邵*平	2017-04-28 13:35:00						1、“右输卵管”系膜副中肾管囊肿。_x000D_ _x000D_ 2、“子宫”平滑肌瘤。							1379685	肌瘤	41	1	0	2	1	3	0	发现盆腔包块伴增大1年余	2	2	163	65	24.4646	子宫肌瘤_x000D_ 宫腔内节育器_x000D_ _x000D_ （肌瘤之间由于声衰减或者位置关系存在遮挡可能，超声所示肌瘤个数及位置仅供临床医生参考）	经阴道探查：子宫增大，宫体前位，宫颈壁内见数个囊性暗区，大的约9×7MM，囊壁光滑（宫颈囊肿），宫腔内见节育器回声，位置正常，内膜厚8MM（双层）。两侧卵巢大小及内部回声正常。_x000D_ 子宫前壁近宫颈见一大小约10×7×12MM的低回声结节，边界清，内部回声欠均匀，距浆膜面2.9MM。_x000D_ 子宫后壁近底部见一大小约76×61×76MM的低回声团块，边界清，内部回声不均匀，部分向宫外突出。	4.49	1.7	19.5	1、“右输卵管”系膜副中肾管囊肿。_x000D_ _x000D_ 2、“子宫”平滑肌瘤。	14.4		4.71	3.18	0.34	1.17	0	2	137	335	0	9.6	1
	1563696	刘彩月														1563696		45	2	0	1	2	3	0	发现盆腔包块7年，经量增多4年	1	全子宫切除术;双侧输卵管卵巢切除术;大网膜切除术;肠粘连松解术	62.5	163	23.5237			1.91	0.7	28		5.4	0.7	9.45	7.25	0.27	1.78	0	0	104	169	0
0005221656	1654586	王*敏	2019-12-04 09:00:00						“子宫浆膜下”平滑肌瘤。							1654586	全子宫+双侧输卵管	47	2	0	1	2	3	0	扪及腹部包块2月余，偶发胸闷1月余	2	1	162	63	24.0055	左侧乳房结节 错构瘤？	左侧乳房外下象限（患者自诉体表包块处）腺体边缘处见一大小约24×5×22mm的等回声结节，边界尚清，内部回声不均匀，可探及少许血流回声。	3.5	1.4	16.1	“子宫浆膜下”平滑肌瘤。	3		5.33	3.22	0.62	1.41	0	1	107	199	0	11.6	1
	685475	赵爱妹														685475		49	3	0	0	3	3	0	月经经量增多、经期延长半年	1	开腹子宫切除—冰冻—子宫次广泛切除术+双侧卵巢动静脉高位结扎术+盆腔淋巴清扫术+大网膜部分切除术	71	158	28.441					13		12		8.41	6.9	0.5	0.9	0	2	82	540	1	8.6	0
	1212151	彭新芳														1212151		47	2	0	0	2	2	0	经量增多4年	1	全子宫切除术;双侧输卵管-卵巢切除术	70	158	28.0404			1.27	0.8	18.9		2.5		6.09	4.55	0.53	0.96	0	2	82	327	0	9.5	1
330381-0075302312	1726060	林*霞	2020-09-24 20:00:00						平滑肌瘤 个别富细胞							1726060	全子宫+双侧输卵管	51	1	0	0	1	1	0	发现盆腔包块1年余	2	1	158	56	22.4323	两侧下肢大动脉无明显异常发现_x000D_ 两侧下肢深静脉无明显异常发现_x000D_ _x000D_ （注：床旁超声检查提供信息有限，请酌情参考）	急诊床旁超声检查：_x000D_ 两侧股总、股浅、腘、胫前及足背动脉内径均正常, 血管内-中膜未见明显增厚，内膜面平整, 管腔内血流均通畅。_x000D_ 两侧股总静脉、股浅静脉、腘静脉、胫后静脉未见扩张，以上血管内膜面平整, 血流通畅。_x000D_ 两侧小腿肌间静脉丛未见扩张，管腔内未探及异常回声，探头加压管腔可压闭，CDFI示血流充盈良好。	2.58	2.09	14	标本满意度：满意_x000D_ 上皮细胞量＞40% _x000D_ 诊断意见：未见上皮内病变或恶性病变（NILM）。_x000D_	10.4	0.8	8.47	6.59	0.47	1.36	0	0	101	294	0	10.5	1
330326-1000255641	1687647	王*华	2020-05-12 08:56:00						1、“子宫”平滑肌瘤。_x000D_ _x000D_ 2、“右侧输卵管系膜囊肿”符合副中肾管囊肿。							1687647	肌瘤	40	1	0	1	1	2	0	发现盆腔包块增多伴增大5年	2	2	158	60	24.0346	双下肢深静脉及小腿后侧肌群无明显异常发现_x000D_	两侧股总静脉、股浅静脉、腘静脉、胫后静脉及腓静脉未见扩张，以上血管内膜面平整, 管腔内未探及异常回声，探头加压管腔可压闭，CDFI示血流通畅。_x000D_ 两侧小腿后侧肌群肌纹理清晰，未见明显异常团块回声，肌间静脉丛未见扩张，管腔内未探及异常回声，探头加压管腔可压闭，CDFI示血流充盈良好。	1.4	1.8	12.6	1、“子宫”平滑肌瘤。_x000D_ _x000D_ 2、“右侧输卵管系膜囊肿”符合副中肾管囊肿。		0.6	6.87	5.2	0.34	1.29	0	0	138	288	0	10.4	1
	1293469	金玉燕														1293469		51	3	0	1	3	4	0	体检发现盆腔包块10余年，月经增多7月	1	腹腔镜辅助经阴道全子宫切除术[LAVH手术];腹腔镜下双侧输卵管切除术 2、冰冻后切除卵巢	72.5	156	29.7913			2.54	0.6	17.5		4.3		9.42	6.91	0.85	1.65	0	0	71	334	0	10.3	1
	1592111	丁彬彬														1592111		22	0	0	0	0	0	0	月经周期改变1年，阴道不规则出血1个月余	1	腹腔镜下子宫平滑肌瘤剔除术	49	158	19.6283			1.23	2.3	4.5		6.1		6.16	4.09	0.76	1.65	0	0	122	348	0	10	1
330382-0080650671	1398693	谢*英	2017-07-13 10:45:00						1、结合形态学及免疫组化结果：“子宫浆膜面”符合血管平滑肌瘤（大小约12*5*5cm）。_x000D_ _x000D_ 2、子宫多发性平滑肌瘤。_x000D_ _x000D_ 3、增生期宫内膜。_x000D_ _x000D_ 4、双侧输卵管积水，一侧输卵管系膜副中肾管囊肿。_x000D_ CD34( 血管+ ) Desmin( + ) ER-α( + ) PR( + ) SMA( + ) VIM( + )							1398693	全子宫+双侧输卵管	46	3	0	1	3	4	0	发现盆腔包块8年余，月经改变4年	1	1	163	66	24.841	两侧下肢深静脉无明显异常发现	两侧股总静脉、股浅静脉、腘静脉、胫后静脉及小腿肌间静脉未见扩张，以上血管内膜面平整, 血流通畅。	2.15	1	21.1	1、结合形态学及免疫组化结果：“子宫浆膜面”符合血管平滑肌瘤（大小约12*5*5cm）。_x000D_ _x000D_ 2、子宫多发性平滑肌瘤。_x000D_ _x000D_ 3、增生期宫内膜。_x000D_ _x000D_ 4、双侧输卵管积水，一侧输卵管系膜副中肾管囊肿。_x000D_ CD34( 血管+ ) Desmin( + ) ER-α( + ) PR( + ) SMA( + ) VIM( + )	2.5		5.16	3.19	0.5	1.4	0	1	112	279	0	10.2	1
	590289	王玉柳														590289		60	3	0	0	3	3	1	绝经7年阴道出血4天。	1	全子宫双附件切除+盆腔淋巴清扫+腹主动脉旁淋巴结取样+大网膜切除+阑尾切除术	65	162	24.7676			4.9	1.3	24.5		7		7.6	5.1	0.7	1.4	0	1	116	271	0	7.6	0
	836101	陈玉云														836101		47	2	0	0	2	2	0	阴道不规则流血1月余	1	腹腔镜辅助下经阴道子宫切除术+双侧附件切除术	54	147	24.9896			2.43	1	9.6		10.8		8.91	6.2	0.9	1.8	0	0	81	308	0	10.4	1
330326-10356	1566601	白*伟	2019-02-27 12:52:00						子宫+双侧输卵管标本：_x000D_ 1.子宫多发性平滑肌瘤。_x000D_ 2.宫颈慢性炎伴鳞化。_x000D_ 3.增生期子宫内膜。_x000D_ 4.一侧输卵管系膜副中肾管囊肿，另一侧输卵管未见特异。							1566601	全子宫+双侧输卵管	44	1	0	0	1	1	0	发现盆腔包块伴增大7年	2	1	159	55	21.7555	两侧下肢深静脉无明显异常发现	两侧股总静脉、股浅静脉、腘静脉、胫后静脉及小腿肌间静脉丛未见扩张，以上血管内膜面平整, 血流通畅。	2.21	1	14.1	子宫+双侧输卵管标本：_x000D_ 1.子宫多发性平滑肌瘤。_x000D_ 2.宫颈慢性炎伴鳞化。_x000D_ 3.增生期子宫内膜。_x000D_ 4.一侧输卵管系膜副中肾管囊肿，另一侧输卵管未见特异。	3.0	0.8	7.39	4.68	0.57	1.49	0	1	103	381	0	9.3	1
330381-0000506738	1414096	周*蓉	2017-09-04 14:54:00						子宫多发性平滑肌瘤							1414096	全子宫+双侧输卵管	44	1	0	2	1	3	0	发现盆腔包块6年，外阴肿物脱出2月余	2	1	150	53	23.5556	两侧下肢深静脉无明显异常发现	两侧股总静脉、股浅静脉、腘静脉、胫后静脉及小腿肌间静脉丛未见扩张，以上血管内膜面平整, 血流通畅。	6.98	1.2	10.9	标本满意度：满意_x000D_ 上皮细胞量＞40%_x000D_ 诊断意见：未见上皮内病变或恶性病变（NILM）。_x000D_	22.4		6.33	4.34	0.45	1.3	0	1	118	453	1	10.4	1
0000481471	1699873	孙*源	2020-06-28 09:10:00						1、“子宫”平滑肌瘤。_x000D_ _x000D_ 2、子宫内膜息肉，腺体呈分泌期图像。							1699873	肌瘤	38	0	0	0	0	0	0	发现盆腔包块2年，下腹痛1月	3	2	160	59	23.0469	宫颈管内异常回声 内膜息肉？_x000D_ 子宫肌瘤（肌壁间、浆膜下）_x000D_ 盆腔实质性团块 考虑浆膜下肌瘤伴液化_x000D_ _x000D_ （肌瘤之间由于声衰减或者位置关系存在遮挡可能，超声所示肌瘤个数及位置仅供临床医生参考）	经阴道探查：子宫增大，宫体前位，宫颈管内见一大小约7×3×5mm的偏强回声结节，边界清，内部回声欠均匀。宫腔内未见明显异常回声，内膜厚8mm（双层）。两侧卵巢大小及内部回声正常。盆腔左侧见一大小约58×47×57mm的低回声团块，边界清，内部回声不均匀，可见不规则的液性暗区，与子宫左前壁相连；紧贴左侧壁见一大小约18×16×17mm的低回声结节。_x000D_ 宫壁见数个低回声结节，边界均清，内部回声欠均匀，大致如下所述：_x000D_ 右后壁见一大小约18×14×16mm的低回声结节，外缘距浆膜层约1.8mm；_x000D_ 前壁见一大小约26×22×25mm的低回声结节，小部分向宫外突出；_x000D_ 宫壁内另见数个（4-5）低回声结节，大的约10×6×9mm，边界清，内部回声欠均匀。	1.68	0.5	33.6	1、“子宫”平滑肌瘤。_x000D_ _x000D_ 2、子宫内膜息肉，腺体呈分泌期图像。	4.4	0.7	8.22	5.82	0.62	1.64	0	0	126	246	0	13.0	1
0002129137	1543674	金*芬	2018-12-10 16:17:00						1、“子宫”平滑肌瘤。_x000D_ _x000D_ 2、“左输卵管系膜”副中肾管囊肿。							1543674	肌瘤	43	1	0	2	1	3	0	发现盆腔包块12年	2	2	165	65	23.8751	超声造影提示：左肾周肿块 考虑错构瘤或脂肪堆积	Sonovue超声造影：_x000D_ 左肾中极外侧边缘见一个大小约10×8mm楔形样皮质缺损，代之一高回声团填充，并向肾外生长，呈被状覆盖肾外侧缘，范围约128×21×54mm，为均匀性高回声，呈脂肪样组织。肾实质内可见粗大的血管进入该团块。_x000D_ _x000D_ 经肘静脉团注Sonovue造影剂混悬液1.2ml后,该巨大团块灌注相及消退相均呈低增强。	2.51	1	7.8	1、“子宫”平滑肌瘤。_x000D_ _x000D_ 2、“左输卵管系膜”副中肾管囊肿。	5.2	0.5	4.52	2.87	0.43	1.19	0	2	99	444	1	10.5	1
0004496098	1172887	乐*春	2017-11-14 11:55:00						1、“子宫”平滑肌瘤。_x000D_ 2、“右侧输卵管系膜”泡状附件（中肾管残留小囊肿）。							1172887	肌瘤	38	2	0	2	2	4	0	发现盆腔包块8年，经量增多2年	1	2	160	56	21.875	双下肢深静脉无异常发现	两侧股总静脉、股浅静脉、腘静脉、胫后静脉及两侧小腿肌间静脉丛未见扩张，以上血管内膜面光滑, 平整, 血流通畅。	1.5	0.8		1、“子宫”平滑肌瘤。_x000D_ 2、“右侧输卵管系膜”泡状附件（中肾管残留小囊肿）。	＜2	0.5	4.9	3.1	0.35	1.37	0	1	111	172	0	11.2	1
0004110514	1272993	戴*娜	2016-02-29 10:20:00						“子宫肌瘤1”符合子宫平滑肌瘤。							1272993	肌瘤	38	1	0	4	1	5	0	发现盆腔包块2年	2	2	155	53	22.0604			1.29	0.9	20.5	“子宫肌瘤1”符合子宫平滑肌瘤。	4.3	0.4	8.64	6	0.74	1.87	1	0	118	270	0	11	1
	1753700	王国燕														1753700		53	2	0	1	2	3	1	发现盆腔包块逐渐增大10余年。	2	全子宫切除术;双侧输卵管-卵巢切除术;	41.5	157	16.8364			4.4	1.5	1531.8	肉瘤	137.1	2.4	12.58	9.54	0.82	1.75	0	0	101	211	0	9	0
330381-0075656608	1517620	凌*奶	2018-09-12 13:00:00						全子宫+双输卵管切除标本：_x000D_ 1、子宫多发性平滑肌瘤。_x000D_ _x000D_ 2、宫颈慢性炎伴角化及角化不全。_x000D_ _x000D_ 3、增生期宫内膜。_x000D_ _x000D_ 4、双侧输卵管慢性炎伴一侧输卵管系膜副中肾管囊肿。							1517620	全子宫+双侧输卵管	49	1	0	2	1	3	0	发现盆腔包块伴增大5年	2	1	158	62	24.8358	两侧乳腺增生症	两侧乳房均见乳腺组织局部偏厚, 腺体结构粗大，排列紊乱，乳腺主导管未见扩张。左侧乳腺外上方见一大小约5×3mm的囊性暗区。	2.33	0.8	27.4	全子宫+双输卵管切除标本：_x000D_ 1、子宫多发性平滑肌瘤。_x000D_ _x000D_ 2、宫颈慢性炎伴角化及角化不全。_x000D_ _x000D_ 3、增生期宫内膜。_x000D_ _x000D_ 4、双侧输卵管慢性炎伴一侧输卵管系膜副中肾管囊肿。	13.7		6.24	3.85	0.44	1.83	1	0	130	248	0	13.4	1
	1330841	赵月薇														1330841		50	2	0	0	2	2	0	腹胀进行性加重1月	3	全子宫切除术;双侧输卵管-卵巢切除术;大网膜切除术	60	162	22.8624			3.15	0.8	580		4.6		4.65	3.11	0.48	1.04	0	2	62	350	0	11.2	1
	1509380	郑阿香														1509380		52	2	0	1	2	3	0	发现盆腔包块14年	2	腹腔镜辅助经阴道全子宫切除术[LAVH手术];腹腔镜下双侧输卵管-卵巢切除术	61	163	22.9591			17.36	0.5	30.7		3.3		5.96	3.33	0.72	1.56	0	1	126	325	0	10.2	1
	1462555	金红霞														1462555		41	0	0	0	0	0	0	异常阴道流血10余天	1	诊断性刮宫;子宫肌瘤切除术;(左)卵巢囊肿剥除术;盆腔粘连松解术;	62	160	24.2188			2.48	0.4	73.7		2.7		12.39	9.98	1.28	2.42	1	0	67	313	0	8.6	0
	1127353	金亮妹														1127353		50	2	0	0	2	2	0	发现盆腔肿物3年，月经增多2月。	1	腹腔镜协助下阴式子宫切除术，14-08-05腹式双侧附件切除术+盆腔淋巴结清扫术+肠粘连分解术+大网膜取样术	66	166	23.9512			1.74	2.4	12.6		0.8		8.32	3.97	0.22	1.54	0	1	78	280	0	10.2	1
331100-1001656177	1498894	吴*娟	2018-07-12 14:24:00						_x000D_ _x000D_ “子宫”平滑肌瘤伴玻璃样变性。							1498894	肌瘤	46	1	1	1	2	3	0	月经周期缩短伴经量增多半年余	1	2	153	65	27.7671	两下肢深静脉无明显异常发现	两侧股总静脉、股浅静脉、腘静脉、胫后静脉未见扩张，以上血管内膜面平整, 血流通畅。_x000D_ 右侧小腿肌间静脉丛曲张，最宽处内径7MM，管腔内血流缓慢，但尚通。左侧小腿肌间静脉丛未见明显扩张。	3.9	1.5	37.7	_x000D_ _x000D_ “子宫”平滑肌瘤伴玻璃样变性。	22		5.84	3.49	0.65	1.58	0	1	116	149	0	11.3	1
330327-1000790074	826521	蒋*林	2018-02-07 11:04:00						1、“子宫”平滑肌瘤。_x000D_ _x000D_ 2、“左输卵管”系膜副中肾管囊肿。							826521	肌瘤	44	2	0	2	2	4	0	发现盆腔包块3年余	2	2	168	51	18.0697	两侧甲状腺结节 TI-RADS Ⅲ类	两侧甲状腺大小正常, 包膜清晰、光滑，内部回声纤细, 分布均匀, 两侧叶均见数个低回声或囊性结节，左侧大的约6×3×5MM，右侧大的约12×7×8MM，边界清，内部回声不均匀。		1.3	13.6	1、“子宫”平滑肌瘤。_x000D_ _x000D_ 2、“左输卵管”系膜副中肾管囊肿。	4.4		6.57	4.14	0.52	1.87	1	0	128	261	0	10.7	1
0000041609	1500118	冯*	2018-07-17 15:35:00						子宫+双侧输卵管：_x000D_ 1.子宫平滑肌瘤。_x000D_ 2.老年性宫内膜。_x000D_ 3.宫颈慢性炎。_x000D_ 4.双侧输卵管未见特异。_x000D_ 5.“右”卵巢符合单纯性囊肿。							1500118	全子宫+双侧输卵管	54	1	0	3	1	4	0	发现盆腔包块1月余	2	1	160	56	21.875	两侧下肢深静脉无明显异常发现	两侧股总静脉、股浅静脉、腘静脉、胫后静脉及小腿肌间静脉丛未见扩张，以上血管内膜面平整, 血流通畅。	0.9	0.9	24.4	子宫+双侧输卵管：_x000D_ 1.子宫平滑肌瘤。_x000D_ 2.老年性宫内膜。_x000D_ 3.宫颈慢性炎。_x000D_ 4.双侧输卵管未见特异。_x000D_ 5.“右”卵巢符合单纯性囊肿。	2.3		7.80	6.70	0.59	1.33	0	1	81	267	0	11.0	1
	1256660	吴玲														1256660		37	2	0	1	2	3	0	性生活后阴道流血10月	1	腹腔镜下宫颈癌根治术（保留右侧附件）	49	159	19.3821			2.93	1	16.4		5.6	2.2	8.05	6.49	0.47	1.07	0	2	131	255	0	10.8	1
330324-1000119370	1668504	王*微	2020-01-20 15:10:00						1、子宫多发性平滑肌瘤。_x000D_ 2、分泌期宫内膜。_x000D_ 3、宫颈慢性炎。_x000D_ 4、两侧输卵管未见特异。_x000D_							1668504	全子宫+双侧输卵管	47	2	0	2	2	4	0	发现盆腔包块20余年，经量增多10余年	1	1	166	65	23.5883	两侧乳腺未见明显异常团块 BI-RADS 1类_x000D_	两侧乳房回声欠均匀，腺体排列欠规则，未见明显团块回声，乳腺导管未见明显扩张。两侧腋下未见明显肿大淋巴结回声。	2.54	0.5	14.7	1、子宫多发性平滑肌瘤。_x000D_ 2、分泌期宫内膜。_x000D_ 3、宫颈慢性炎。_x000D_ 4、两侧输卵管未见特异。_x000D_		0.7	3.42	1.89	0.39	1.1	0	2	91	385	0	10.4	1
0070430713	1494770	潘*兰	2018-06-28 15:21:00						“子宫”平滑肌瘤。							1494770	肌瘤	46	2	0	1	2	3	0	发现盆腔包块10年余	2	2	160	49	19.1406	子宫偏大_x000D_ 子宫小肌瘤_x000D_ 盆腔积液	经阴道探查：子宫偏大，宫体后位，三径64×51×61mm，宫颈壁内见多个囊性暗区，大的约13×8MM（宫颈囊肿），前壁下段局部回声分布不均匀（术后改变），宫体壁内另见数个低回声结节，大的约11×7MM，边界清，内部回声欠均匀，宫腔内未见明显异常回声，内膜厚10.5MM（双层）。两侧卵巢大小及内部回声正常。盆腔内探及深约21mm的液性暗区。	2.1	0.8	20.8	“子宫”平滑肌瘤。		0.6	5.92	4.18	0.48	1.24	0	1	119	289	0	8.6	0
0015546674	1573378	王*菊	2019-03-20 12:15:00						1、子宫平滑肌瘤。_x000D_ _x000D_ 2、双侧输卵管未见慢性特异。							1573378	肌瘤	44	2	0	1	2	3	0	发现盆腔包块3年	2	2	153	54	23.0681	左侧乳腺囊肿 BI-RADS 2类 _x000D_ 两侧甲状腺无明显异常发现	两侧乳房回声均匀，腺体排列较规则，乳腺导管未见明显扩张。_x000D_ 左侧乳腺内见数个囊性暗区，大的约6×2mm。 _x000D_ 两侧甲状腺大小正常, 包膜清晰、光滑，内部回声纤细, 分布均匀, 右侧中极见一大小约3×2mm的囊性暗区，囊内见一颗光点样偏强回声（滤泡囊肿）。	3.3	0.7	27.7	1、子宫平滑肌瘤。_x000D_ _x000D_ 2、双侧输卵管未见慢性特异。	7.3	0.8	6.93	4.64	0.59	1.62	0	0	138	409	1	10.1	1
330381-0075911111	1634797	周*珠	2019-09-25 10:12:00						1、“子宫内膜”分泌期宫内膜，灶区息肉炎改变，少数腺体呈增生过长残留图像。_x000D_ _x000D_ 2、“子宫”平滑肌瘤。							1634797	子宫内膜；子宫平滑肌瘤	44	2	0	0	2	2	0	发现盆腔包块逐渐增大7年	2	2	165	72	26.4463	两下肢深静脉无明显异常发现	两侧股总静脉、股浅静脉、腘静脉、胫后静脉未见扩张，以上血管内膜面平整, 血流通畅。_x000D_ 两侧小腿后侧肌群未见明显异常回声。	1.71	1	14.7	1、“子宫内膜”分泌期宫内膜，灶区息肉炎改变，少数腺体呈增生过长残留图像。_x000D_ _x000D_ 2、“子宫”平滑肌瘤。	5	0.7	7.3	5.11	0.4	1.72	0	0	139	221	0	11.6	1
330382-0080139692	680213	高*丽	2019-12-05 11:15:00						1、“子宫”平滑肌瘤。_x000D_ _x000D_ 2、符合子宫内膜息肉，增生期宫内膜。							680213	子宫平滑肌瘤；子宫内膜息肉	45	1	0	2	1	3	0	发现盆腔包块1年余，月经周期不规则1年	1	2	150	45	20	两侧下肢深静脉无明显异常发现	两侧股总静脉、股浅静脉、腘静脉、胫后静脉未见扩张，以上血管内膜面平整, 血流通畅。两侧小腿后侧肌群未见明显异常回声。	1.93	2	33.2	1、“子宫”平滑肌瘤。_x000D_ _x000D_ 2、符合子宫内膜息肉，增生期宫内膜。	＜0.8	0.8	6.37	4.91	0.37	1.05	0	0	125	248	0	11.0	1
330327-5005027494	1470412	陈*阳	2019-07-15 13:48:00						“子宫”平滑肌瘤。							1470412	肌瘤	45	1	0	1	1	2	0	发现盆腔包块7年，排尿不尽感1月	2	2	158	60	24.0346	两侧小腿肌间静脉丛曲张伴血流淤滞状态_x000D_ _x000D_ （注：急诊超声检查提供信息有限，请酌情参考。）	急诊超声检查：_x000D_ 两侧股总静脉、股浅静脉、腘静脉、胫后静脉未见扩张，以上血管内膜面平整, 血流通畅。_x000D_ 两侧小腿肌间静脉丛均见一条扩张的管腔回声，最宽处内径右侧约8mm，左侧约6mm，管腔内血流缓慢，呈自发造影现象。	1.88	0.4	10.7	“子宫”平滑肌瘤。	3.5	0.6	6.4	4.17	0.43	1.64	0	0	106	314	0	10.3	1
330381-0000163388	1507620	曾*琴	2018-08-16 18:56:00						1、“子宫”平滑肌瘤。_x000D_ _x000D_ 2、“双侧输卵管系膜”副中肾管囊肿。							1507620	肌瘤	39	1	0	0	1	1	0	发现盆腔包块伴增大3年，经量增多1年余	1	2	153	49.5	21.1457	两侧下肢深静脉无明显异常发现	两侧股总静脉、股浅静脉、腘静脉、胫后静脉及小腿肌间静脉丛未见扩张，以上血管内膜面平整, 血流通畅。	1.72	0.6	19.4	1、“子宫”平滑肌瘤。_x000D_ _x000D_ 2、“双侧输卵管系膜”副中肾管囊肿。	3.9	1.1	6.6	4.48	0.61	1.46	0	1	92	279	0
330381-0000471881	1659014	王*微	2019-12-18 12:38:00						“子宫”平滑肌瘤。							1659014	肌瘤	45	2	0	2	2	4	0	发现盆腔包块伴增大7年，尿频1年	2	2	152	49	21.2084	两侧下肢深静脉无明显异常发现	两侧股总静脉、股浅静脉、腘静脉、胫后静脉未见扩张，以上血管内膜面平整, 血流通畅。两侧小腿后侧肌群内未见明显异常回声。	1.02	1	13.1	“子宫”平滑肌瘤。	3.2	0.6	4.14	2.38	0.50	1.21	0	1	112	202	0	11.2	1
330381-0075317743	1626689	郑*武	2019-08-30 11:03:00						复阅切片补充报告：_x000D_ 1、子宫平滑肌瘤伴钙化。_x000D_ 2、“左、右输卵管系膜”泡状附件。_x000D_ 3 “右卵巢肿物”少量肌纤维性囊壁样组织，灶区见单层立方上皮，上皮细胞未见瘤样增生，考虑为卵巢冠囊肿。_x000D_ 5、送检破碎增生期宫内膜。							1626689	肌瘤	45	1	0	0	1	1	0	发现盆腔包块及宫腔赘生物2年余	2	2	160	53	20.7031	两侧下肢深静脉无明显异常发现	两侧股总静脉、股浅静脉、腘静脉、胫后静脉未见扩张，以上血管内膜面平整, 血流通畅。两侧小腿后侧肌群未见明显异常回声。	5.6	2.1	7.1	复阅切片补充报告：_x000D_ 1、子宫平滑肌瘤伴钙化。_x000D_ 2、“左、右输卵管系膜”泡状附件。_x000D_ 3 “右卵巢肿物”少量肌纤维性囊壁样组织，灶区见单层立方上皮，上皮细胞未见瘤样增生，考虑为卵巢冠囊肿。_x000D_ 5、送检破碎增生期宫内膜。	36		4.07	2.6	0.2	1.22	0	1	115	328	0	10.7	1
	1480612	李粉弟														1480612		56	2	0	0	2	2	1	发现盆腔包块5年余，下腹胀10天。	3	腹腔镜下全子宫切除术;腹腔镜下双侧输卵管-卵巢切除术;腹腔镜下盆腔粘连松解术	61	156	25.0657			4.2	1	88.5		3.8	0.4	8.31	6.63	0.46	1.13	0	2	136	201	0	12.7	1
00011301804544	1163782	郑*芬	2014-11-27 18:03:00						子宫多发性平滑肌瘤							1163782	全子宫+双侧输卵管	48	2	0	1	2	3	0	经量增多6年余	1	1	166	54.5	19.7779			1.19	0.3	13.9	“右”卵巢黄素化滤泡囊肿。	5.7	0.5	5.49	3.54	0.41	1.48	0	1	78	422	1	9.0	0
0005285322	1651090	黄*晶	2019-11-21 13:55:00						1.“子宫内膜”破碎宫内膜呈增生期图像。_x000D_ 2.“子宫肌瘤”平滑肌瘤。							1651090	肌瘤	38	1	0	2	1	3	0	经量过多5月	1	2	158	57	22.8329	子宫肌瘤_x000D_ _x000D_ （肌瘤之间由于声衰减或者位置关系存在遮挡可能，超声所示肌瘤个数及位置仅供临床医生参考）	经阴道探查：子宫偏大，宫体前位，子宫前壁下段手术切口处见范围约7×2×10mm的液性暗区，此处宫壁厚约2.6mm，子宫前壁见一大小约53×42×55mm的低回声团块，内缘略向宫腔内凸起，外缘部分向宫外突出，边界清，内部回声不均匀。宫腔内未见明显其它异常回声，内膜厚4mm（双层）。两侧卵巢大小及内部回声正常。	1.6	1.1	12.1	1.“子宫内膜”破碎宫内膜呈增生期图像。_x000D_ 2.“子宫肌瘤”平滑肌瘤。	5.2	0.6	4.84	2.82	0.33	1.61	0	0	122	293	0	10.9	1
0075221255	1554655	周*霞	2019-01-17 10:48:00						1、增生期宫内膜，另见少量宫颈管组织伴腺体鳞化。_x000D_ _x000D_ 2、“右输卵管系膜囊肿”符合输卵管系膜副中肾管囊肿。_x000D_ _x000D_ 3、“子宫”平滑肌瘤。							1554655	全子宫+双侧输卵管	45	1	0	5	2	6	0	发现盆腔包块2年余	2	1	160	59	23.0469	两下肢深静脉无明显异常发现	急诊超声检查:_x000D_ 两侧股总静脉、股浅静脉、腘静脉、胫后静脉未见扩张，以上血管内膜面平整, 血流通畅。_x000D_ 两侧小腿肌间静脉丛未见明显扩张。	8.91	0.7	38.6	1、增生期宫内膜，另见少量宫颈管组织伴腺体鳞化。_x000D_ _x000D_ 2、“右输卵管系膜囊肿”符合输卵管系膜副中肾管囊肿。_x000D_ _x000D_ 3、“子宫”平滑肌瘤。	5.2	0.6	5.12	3.48	0.42	1.16	0	2	88	365	0	9.5	1
0075077875	1156126	陈*燕	2017-06-07 12:59:00						子宫+双输卵管切除标本：_x000D_ 1、子宫多发性平滑肌瘤。_x000D_ 2、宫颈慢性炎。_x000D_ 3、增生性宫内膜。_x000D_ 4、“双侧”输卵管未见特异。							1156126	全子宫+双侧输卵管	45	3	0	1	2	4	0	发现盆腔包块7年，增大1年	2	1	156	61	25.0657	左侧小腿肌间静脉丛曲张	两侧股总静脉、股浅静脉、腘静脉、胫后静脉及右侧小腿肌间静脉丛未见扩张，以上血管内膜面平整, 血流通畅。左侧小腿肌间静脉丛曲张，最宽处内径7MM，管腔内血流尚通畅。	1.52	1.3	16.5	子宫+双输卵管切除标本：_x000D_ 1、子宫多发性平滑肌瘤。_x000D_ 2、宫颈慢性炎。_x000D_ 3、增生性宫内膜。_x000D_ 4、“双侧”输卵管未见特异。	8.4		5.63	3.38	0.49	1.63	0	0	82	351	0
	848294	季葱微														848294		49	2	0	2	2	4	0	体检发现盆腔包块10年，进行性增大1年	2		71.5	160	27.9297					11.6				5.54	3.4	0.6	1.5	0	1	121	234	0	8.5	0
	1633705	陈秀莲														1633705		64	2	0	0	2	2	1	发现盆腔包块10余年，明显增大5月	2	经腹全子宫切除术;双侧输卵管-卵巢切除术	45	165	16.5289			3.1	3.1	67.7		53.2	0.8	4.17	2.4	0.45	1.14	0	2	135	228	0	10.4	1
0075291100	1669376	王*云	2020-01-21 12:00:00						1、子宫内膜息肉、分泌期宫内膜。_x000D_ 2、子宫平滑肌瘤。_x000D_ 3、“双侧”输卵管系膜副中肾管囊肿。							1669376	肌瘤	43	2	0	0	2	2	0	发现盆腔包块1月余	2	2	155	60	24.974	脂肪肝倾向	肝脏大小正常，内部回声偏强、细密，后方声衰减不明显，血管网络欠清，门静脉主干内径正常。胆囊大小正常，囊壁薄，囊内未见异常回声。胆总管及肝内胆管无扩张。脾脏无肿大。胰腺头、体部未见明显异常回声，尾部因胃肠气体遮盖显示不清。两肾大小及内部回声正常。_x000D_	1.25	1.9	15.1	1、子宫内膜息肉、分泌期宫内膜。_x000D_ 2、子宫平滑肌瘤。_x000D_ 3、“双侧”输卵管系膜副中肾管囊肿。	<0.8	0.6	6.02	3.79	0.49	1.65	0	0	107	312	0	11.1	1
330326-87785	1647305	王*云	2019-11-06 11:00:00						子宫+双侧输卵管切除标本：_x000D_ 1.子宫多发性平滑肌瘤伴部分区玻璃样变；_x000D_ 2.宫颈慢性炎伴纳氏囊肿形成；_x000D_ 3.增生期子宫内膜；_x000D_ 4.双侧输卵管粘膜上皮增生活跃伴灶区轻度不典型增生，建议临床注意随访。							1647305	全子宫+双侧输卵管	48	1	0	2	1	3	0	发现盆腔包块伴增大10年，经量增多2月	1	1	161	51	19.6752	两侧下肢深静脉无明显异常发现	两侧股总静脉、股浅静脉、腘静脉、胫后静脉未见扩张，以上血管内膜面平整, 血流通畅。_x000D_ 两侧小腿后侧肌群未见明显异常回声。	3.35	1.4	12.5	子宫+双侧输卵管切除标本：_x000D_ 1.子宫多发性平滑肌瘤伴部分区玻璃样变；_x000D_ 2.宫颈慢性炎伴纳氏囊肿形成；_x000D_ 3.增生期子宫内膜；_x000D_ 4.双侧输卵管粘膜上皮增生活跃伴灶区轻度不典型增生，建议临床注意随访。	18.1	0.5	7.72	5.05	0.38	2.22	1	0	87	269	0
330324-1556023	1613769	周*娟	2019-07-25 15:46:00						1、“子宫”平滑肌瘤。_x000D_ _x000D_ 2、“双侧输卵管”系膜副中肾管囊肿。							1613769	肌瘤	40	2	0	1	2	3	0	发现盆腔包块8年	2	2	168	68	24.093	右侧甲状腺结节 TI-RADS 3类_x000D_ 两侧乳腺未见明显异常团块 BI-RADS 1类	两侧甲状腺大小正常, 包膜清晰、光滑，内部回声纤细, 分布均匀, 右侧叶中下极见一大小约2.1×1.9×2.5mm的低回声结节，边界清，内部回声欠均匀。_x000D_ 两侧乳房回声不均匀，腺体排列较规则，未见明显团块回声，乳腺导管未见明显扩张。 _x000D_	1.6	1.6	27.4	1、“子宫”平滑肌瘤。_x000D_ _x000D_ 2、“双侧输卵管”系膜副中肾管囊肿。	9.2	0.9	5.61	3.58	0.63	1.12	0	2	84	318	0
00011301567143	1473660	李*丹	2018-04-13 12:39:00						1、分泌期宫内膜伴息肉样改变。_x000D_ _x000D_ 2、“子宫”平滑肌瘤。							1473660	肌瘤	32	1	0	1	1	2	0	发现盆腔包块7年	2	2	153	60	25.6312	子宫肌瘤_x000D_ 子宫内膜回声改变 内膜息肉？_x000D_ 剖宫产切口憩室_x000D_ 盆腔积液_x000D_ （肌瘤之间由于声衰减或者位置关系存在遮挡可能，超声所示肌瘤个数及位置仅供临床医生参考）	经阴道探查：子宫增大，宫体后位，子宫前壁下段手术切口处见范围约4×11×16MM的液性暗区，此处宫壁厚约1.9MM。子宫前壁下段见一大小约63×53×68MM的低回声团块，大部分向宫外突出，边界清，内部回声不均匀。内膜厚约17MM（双层），内部回声分布不均匀，局部回声偏强呈结节状，大的范围约8×8×7MM。两侧卵巢大小及内部回声正常。子宫直肠陷窝可探及深约24MM的液性暗区。	2.85	0.5	58.8	1、分泌期宫内膜伴息肉样改变。 2、“子宫”平滑肌瘤。	4.6	0.7	4.63	2.61	0.29	1.65	0	0	89	301	0	9.5	1
0005616450	1572275	詹*瑞	2019-03-20 14:18:00						“子宫”平滑肌瘤。							1572275	肌瘤	33	1	0	1	1	2	0	经量增多1年余	1	2	159	62	24.5243	两侧下肢深静脉无明显异常发现	两侧股总静脉、股浅静脉、腘静脉、胫后静脉及小腿肌间静脉丛未见扩张，以上血管内膜面平整, 血流通畅。	3.05	1.7	33.5	“子宫”平滑肌瘤。	9.3	0.4	11.38	9.4	0.31	1.6	0	0	110	278	0	10.2	1
0075231711	1598872	叶*萍	2019-06-10 14:53:00						“子宫”平滑肌瘤。							1598872	肌瘤	43	2	0	2	2	4	0	经量增多经期延长1年	1	2	158	63	25.2363	两侧下肢深静脉无明显异常发现	两侧股总静脉、股浅静脉、腘静脉、胫后静脉及小腿肌间静脉丛未见扩张，以上血管内膜面平整, 血流通畅。	1.04	0.8	12.7	“子宫”平滑肌瘤。	3.9	0.7	3.77	1.87	0.23	1.64	0	0	109	278	0	10.6	1
	1122506	蔡丽雅														1122506		48	1	0	5	1	6	1	“阔韧带”肌瘤剥除术后1年半，再发1月	2	开腹盆腔粘连分离+宫颈广泛切除+双附件切除+盆腔淋巴结取样术+大网膜切除术+后腹膜肿块切除	48	158	19.2277			3.44	1.2	22.8		3.3	0.8	10.83	8.21	0.71	1.88	1	0	135	254	0	11.7	1
330327-1000630061	1583796	蓝*贞	2019-04-25 15:06:00						1、“双侧输卵管”一侧输卵管积水、另一侧输卵管系膜处见副中肾管囊肿。_x000D_ _x000D_ 2、“子宫”平滑肌瘤。							1583796	肌瘤	48	2	0	2	2	4	0	发现盆腔包块5年，经量增多伴经期延迟1年	1	2	158	70	28.0404	两侧小腿肌间静脉丛曲张_x000D_	两侧股总静脉、股浅静脉、腘静脉、胫后静脉未见扩张，以上血管内膜面平整, 血流通畅。两侧小腿肌间静脉均见数条管腔回声，最宽处内径左侧约8mm，右侧约10mm，管腔内血流通畅。_x000D_	3.51	0.7	6.3	1、“双侧输卵管”一侧输卵管积水、另一侧输卵管系膜处见副中肾管囊肿。_x000D_ _x000D_ 2、“子宫”平滑肌瘤。	11.9	0.5	4.45	2.64	0.26	1.46	0	1	126	280	0	10.4	1
00011412347717	1736596	万*英	2020-11-05 13:25:00						1、“子宫肌瘤”平滑肌瘤。_x000D_ 2、“子宫内膜”增生期宫内膜伴腺体不规则增生。							1736596	肌瘤	47	2	0	2	2	4	0	经期延长3月	1	1	158	54	21.6311	两侧下肢深静脉无明显异常发现_x000D_	两侧股总静脉、股浅静脉、腘静脉、胫后静脉及腓静脉未见扩张，以上血管内膜面平整, 管腔内未探及异常回声，探头加压管腔可压闭，CDFI示血流通畅。_x000D_ 两侧小腿肌间静脉丛未见扩张，管腔内未探及异常回声，探头加压管腔可压闭，CDFI示血流充盈良好。	2.71	0.8	17.1	1、“子宫肌瘤”平滑肌瘤。_x000D_ 2、“子宫内膜”增生期宫内膜伴腺体不规则增生。	7.4	0.4	6.38	4.49	0.32	1.49	0	1	129	375	0	11.7	1
	1569965	董细香														1569965		56	3	0	0	3	3	1	发现盆腔包块半年余，下腹痛2天	3	全子宫切除术;双侧输卵管-卵巢切除术;大网膜部分切除术;”，	57	153	24.3496			2.1	1	8.4		2	1.3	8.71	5.28	0.91	2.47	1	0	150	329	0	9.1	0
00019500375107	1580530	刘*燕	2019-04-10 13:50:00						“子宫”平滑肌瘤。							1580530	肌瘤	38	2	0	0	2	2	0	发现盆腔包块4年余，经量增多2年余	1	2	163	68	25.5937	两侧下肢深静脉无明显异常发现_x000D_	两侧股总静脉、股浅静脉、腘静脉、胫后静脉及小腿肌间静脉丛未见扩张，以上血管内膜面平整, 血流通畅。_x000D_	1.1	1.1	14.9	“子宫”平滑肌瘤。	4.2	0.5	8.53	5.21	0.86	2.35	1	0	108	412	1	9.6	1
0075290790	1317976	郑*燕	2019-05-08 10:23:00						子宫平滑肌瘤。							1317976	肌瘤	47	1	0	0	1	1	0	发现盆腔包块2年	2	2	150	50	22.2222	右侧小腿肌间静脉丛曲张	两侧股总静脉、股浅静脉、腘静脉、胫后静脉及左侧小腿肌间静脉丛未见扩张，以上血管内膜面平整, 血流通畅。右侧小腿肌间静脉丛见数条扩张的管腔回声，最宽处内径约7mm，管腔内血流通畅。	3.23	2.1	21.4	子宫平滑肌瘤。	4.6	1	6.44	4.22	0.42	1.71	0	0	140	237	0	11.4	1
	1755269	吴丽燕														1755269		49	1	0	1	1	2	0	体检发现盆腔包块伴增大10余年	2	腹腔镜下全子宫切除术;腹腔镜下双侧输卵管-卵巢切除术;腹腔镜下盆腔粘连松解术;剔除左侧宫骶韧带处赘生物	54	155	22.4766			1.8	1.4	21.9		13.2	0.5	5.53	3.47	0.51	1.41	0	1	117	257	0	11.7	1
	876954	叶叔华														876954		53	2	0	2	2	4	0	体检发现盆腔包块10年，经量增多5月余	1	腹腔镜下子宫全切术+双附件切除术+盆腔淋巴切除术	63	159	24.9199			2.21	1.8	29.8		8.2		7.61	5.37	0.56	1.55	0	1	116	429	1	10.5	1
330329-1000437271	1460771	郑*娇	2018-03-06 10:00:00						子宫+双侧输卵管：_x000D_ 1、子宫多发性平滑肌瘤。_x000D_ 2、宫颈慢性炎。_x000D_ 3、增生期宫内膜。_x000D_ 4、双侧输卵管未见特异。_x000D_ 5、一侧输卵管系膜副中肾管囊肿。_x000D_							1460771	全子宫+双侧输卵管	50	3	0	0	3	3	0	发现盆腔包块3月余，异常阴道流血3月余	1	1	165	66	24.2424	两下肢深静脉无明显异常发现	两侧股总静脉、股浅静脉、腘静脉、胫后静脉未见扩张，以上血管内膜面光滑, 平整, 血流通畅。两侧小腿肌间静脉未见明显扩张。	2.06	1.31	8.1	子宫+双侧输卵管：_x000D_ 1、子宫多发性平滑肌瘤。_x000D_ 2、宫颈慢性炎。_x000D_ 3、增生期宫内膜。_x000D_ 4、双侧输卵管未见特异。_x000D_ 5、一侧输卵管系膜副中肾管囊肿。_x000D_	<0.8	2	7.32	4.48	0.93	1.86	1	0	72	279	0	10.4	1
00011410490885	1431216	周*飞	2017-11-08 13:54:00						1、“子宫”平滑肌瘤。_x000D_ 2、增生期宫内膜。_x000D_ 3、“右侧”输卵管系膜副中肾管囊肿。							1431216	肌瘤	35	3	0	0	3	3	0	发现盆腔包块1年余	2	2	158	62	24.8358	子宫肌瘤_x000D_ _x000D_ （肌瘤之间由于声衰减或者位置关系存在遮挡可能，超声所示肌瘤个数及位置仅供临床医生参考）	经阴道探查：子宫增大，宫体前位，宫颈壁内见数个囊性暗区，大的约9×5MM（宫颈囊肿），子宫左侧壁见一大小约56×37×46MM的低回声团块，境界清，内部回声不均匀，内膜受压移位，其外缘距浆膜层6MM，内膜厚13MM（双层），宫腔内未见其它回声。两侧卵巢大小及内部回声正常。		0.6	10.2	1、“子宫”平滑肌瘤。_x000D_ 2、增生期宫内膜。_x000D_ 3、“右侧”输卵管系膜副中肾管囊肿。	3.3		3.77	2.07	0.19	1.44	0	1	80	342	0	11	1
0000412207	1536093	叶*华	2018-11-15 14:24:00						1、符合子宫内膜息肉，增生期子宫内膜。_x000D_ _x000D_ 2、“粘膜下”子宫平滑肌瘤。_x000D_ _x000D_ 3、“子宫”平滑肌瘤。_x000D_ _x000D_ 4、“左侧”输卵管系膜副中肾管囊肿。							1536093	肌瘤	40	1	0	2	1	3	0	发现盆腔包块1月余	2	2	161	62.5	24.1117	子宫肌瘤（肌壁间、粘膜下）_x000D_ 宫腔内节育器_x000D_ _x000D_ （肌瘤之间由于声衰减或者位置关系存在遮挡可能，超声所示肌瘤个数及位置仅供临床医生参考）	经阴道探查：子宫偏大，宫体后位，宫腔内见节育器回声，位置正常，内膜厚9mm（双层）。两侧卵巢大小及内部回声正常。宫壁内见数个低回声团块，边界清，内部回声不均匀，如下所述：_x000D_ 左后壁64×43×57mm，外缘距浆膜层约3mm；_x000D_ 左侧壁下段见一大小约38×25×30mm的低回声结节，外缘距浆膜层约3mm；_x000D_ 底部见一大小约12×9×11mm的低回声结节，外缘距浆膜层约4mm；_x000D_ 宫腔下段见一大小约12×7×11mm的低回声结节；_x000D_ 后壁见一大小约6×5mm的低回声结节。	4.9	3.7	19.4	1、符合子宫内膜息肉，增生期子宫内膜。_x000D_ _x000D_ 2、“粘膜下”子宫平滑肌瘤。_x000D_ _x000D_ 3、“子宫”平滑肌瘤。_x000D_ _x000D_ 4、“左侧”输卵管系膜副中肾管囊肿。	10.7	0.8	5.84	4.1	0.23	1.44	0	1	138	290	0	9.5	1
	1139634	杨莹														1139634		37	1	0	2	1	3	0	发现盆腔包块4年，子宫平滑肌瘤术后18天。	2	腹腔镜下子宫+双附件切除+盆腔淋巴结清扫术	60	166	21.7738			0.79	0.7	44.3		9		7.2	5.06	0.52	1.51	0	1	134	244	0	10.5	1
330381-0000518876	1711596	俞*凤	2020-08-07 11:46:00						“子宫”平滑肌瘤伴粘液样变性。							1711596	肌瘤	43	1	0	0	2	1	0	发现盆腔包块伴增大7年余	2	2	155	53	22.0604	两侧下肢大动脉无明显异常发现_x000D_ 两侧下肢深静脉及小腿后侧肌群无明显异常发现_x000D_	两侧股总、股浅、腘、胫前及足背动脉内径均正常, 血管内-中膜未见明显增厚，内膜面平整, 管腔内血流均通畅，左侧足背动脉峰速度约36cm/s，右侧足背动脉峰速度约37cm/s。_x000D_ 两侧股总静脉、股浅静脉、腘静脉、胫后静脉及腓静脉未见扩张，以上血管内膜面平整, 管腔内未探及异常回声，探头加压管腔可压闭，CDFI示血流通畅。_x000D_ 两侧小腿后侧肌群肌纹理清晰，未见明显异常团块回声，肌间静脉丛未见扩张。	3.8	1	17.1	“子宫”平滑肌瘤伴粘液样变性。	8.9		6.2	3.47	0.54	2.10	1	0	129	242	0	9.8	1
330381-0001664562	1648583	陈*微	2019-11-13 11:12:00						子宫+双侧输卵管标本：_x000D_ 1、子宫多发性平滑肌瘤。_x000D_ 2、子宫内膜息肉。_x000D_ 3、分泌期宫内膜。_x000D_ 4、宫颈慢性炎。_x000D_ 5、一侧输卵管系膜副中肾管囊肿，另一侧输卵管未见特异。_x000D_ 6、宫颈息肉。_x000D_ _x000D_ 注：标本已重取。_x000D_							1648583	子宫+双输卵管	47	2	0	0	2	2	0	发现盆腔包块伴增大5年，经量增多1年	1	1	160	50	19.5312	两侧下肢大动脉无明显异常发现_x000D_ 两侧下肢深静脉无明显异常发现	两侧股总、股浅、腘、胫前及足背动脉内径均正常, 血管内-中膜未见明显增厚，内膜面平整, 管腔内血流均通畅。左侧足背动脉峰速度约33cm/s，右侧足背动脉峰速度约39cm/s。_x000D_ 两侧股总静脉、股浅静脉、腘静脉、胫后静脉未见扩张，以上血管内膜面平整, 血流通畅。_x000D_ 两侧小腿后侧肌群未见明显异常回声。	2.85	2.4	12.5	子宫+双侧输卵管标本：_x000D_ 1、子宫多发性平滑肌瘤。_x000D_ 2、子宫内膜息肉。_x000D_ 3、分泌期宫内膜。_x000D_ 4、宫颈慢性炎。_x000D_ 5、一侧输卵管系膜副中肾管囊肿，另一侧输卵管未见特异。_x000D_ 6、宫颈息肉。_x000D_ _x000D_ 注：标本已重取。_x000D_	6.0	0.5	4.21	2.35	0.42	1.40	0	1	113	256	0	10.6	1
	628480	高玲玲														628480		48	5	0	2	5	7	0	体检发现‘子宫肌瘤’5年，月经量增多7月余	1	开腹子宫全切术	53	158	21.2306									7.8	5.9	0.4	1.2	0	1	89	251	0	11	1
0076035292	1640558	陈*眉	2020-11-18 16:24:00						子宫+双附件切除标本：_x000D_ _x000D_ 1.子宫多发性平滑肌瘤；_x000D_ _x000D_ 2.萎缩性宫内膜；_x000D_ _x000D_ 3.宫颈及双侧附件未见明显特异。							1640558	子宫+双附件	50	1	0	1	1	2	1	发现盆腔包块15年，明显增大半年	2	1	158	51	20.4294	两侧下肢深静脉无明显异常发现	两侧股总静脉、股浅静脉、腘静脉、胫后静脉及小腿肌间静脉丛未见扩张，以上血管内膜面平整, 血流通畅。	1.98	0.7	13.9	子宫+双附件切除标本：_x000D_ _x000D_ 1.子宫多发性平滑肌瘤；_x000D_ _x000D_ 2.萎缩性宫内膜；_x000D_ _x000D_ 3.宫颈及双侧附件未见明显特异。	5.7	0.8	5.3	3.91	0.32	1.02	0	2	121	241	0	10.8	1
	1670395	陈小兰														1670395		51	1	0	1	1	2	0	发现盆腔包块20余年，月经量增多3月	1	腹腔镜下全子宫切除术;双侧输卵管-卵巢切除术;腹腔镜下盆腔粘连松解术	58	158	23.2335			1.2	2.4	14		4.6		7.94	5.58	0.54	1.62	0	0	90	440	1	9.4	1
	589323	黄杨珠														589323		63	5	0	0	5	5	1	体检发现盆腔包块5个月	2	子宫次广泛切除术+左侧附件切除术+大网膜切除+盆腔淋巴结活检术	61	159	24.1288				1	53.5		4		4.12	2.9	0.3	0.9	0	2	120	263	0	7.9	0
	846882	黄朱菜														846882		49	4	0	0	3	4	0	发现盆腔包块2月	2	开腹子宫切除术+双附件切除术+盆腔包裹性积液剔除术+卵巢动静脉高位结扎术	55	158	22.0317			2.22	0.6	18.6		5.5		8.44	5.4	0.7	2.1	1	0	122	285	0	10.2	1
330381-0001651351	1567141	黄*民	2019-02-28 19:43:00						1、子宫内膜息肉，腺体为增生期图像。_x000D_ _x000D_ 2、“左侧”输卵管系膜副中肾管囊肿。_x000D_ _x000D_ 3、“子宫肌瘤1、2”子宫平滑肌瘤。_x000D_ _x000D_ 4、“右侧”卵巢黄体囊肿。							1567141	肌瘤	36	2	0	0	2	2	0	发现盆腔包块3年余，发现宫腔赘生物2天	2	2	165	79	29.0174	两侧小腿肌间静脉丛曲张	两侧股总静脉、股浅静脉、腘静脉、胫后静脉未见扩张，以上血管内膜面平整, 血流通畅。_x000D_ 两侧小腿肌间静脉丛均见一条管腔曲张，最宽处内径均约8mm，管腔内血流尚通畅。	2.01	0.5	16.7	1、子宫内膜息肉，腺体为增生期图像。_x000D_ _x000D_ 2、“左侧”输卵管系膜副中肾管囊肿。_x000D_ _x000D_ 3、“子宫肌瘤1、2”子宫平滑肌瘤。_x000D_ _x000D_ 4、“右侧”卵巢黄体囊肿。	5.4	0.7	7.64	5.14	0.59	1.79	0	0	126	272	0	10.5	1
00011411738019	1639539	李*荣	2019-10-15 12:35:00						1、“子宫”平滑肌瘤。_x000D_ _x000D_ 2、“子宫”分泌期宫内膜。							1639539	肌瘤	31	1	0	2	1	3	0	经期延长半年余	1	2	160	52.5	20.5078	两侧下肢深静脉无明显异常发现	两侧股总静脉、股浅静脉、腘静脉、胫后静脉未见扩张，以上血管内膜面平整, 管腔内血流通畅。_x000D_ 两侧小腿后侧肌群未见明显异常回声。	6.1	＜0.5	23.1	1、“子宫”平滑肌瘤。_x000D_ _x000D_ 2、“子宫”分泌期宫内膜。	10.3	1.1	6.75	4.59	0.34	1.71	0	0	135	228	0	9.8	1
331021-60506724	1723304	陈*梅	2020-09-14 14:07:00						子宫＋双侧附件：_x000D_ _x000D_ 1.子宫平滑肌瘤；_x000D_ _x000D_ 2.宫颈慢性炎，灶区伴低度鳞状上皮内病变（湿疣样变）；_x000D_ _x000D_ 3.老年萎缩性子宫内膜；_x000D_ _x000D_ 4.一侧卵巢包涵囊肿，另一侧卵巢未见特异；_x000D_ _x000D_ 5.双侧输卵管未见特异。							1723304	全子宫+双侧附件	58	1	0	2	1	3	1	发现盆腔包块1周	2	1	163	65	24.4646	双下肢深静脉及小腿后侧肌群无明显异常发现_x000D_ 两侧下肢大动脉无明显异常发现_x000D_ _x000D_ （注：床旁超声检查提供信息有限，请酌情参考）	急诊床旁超声检查：_x000D_ 两侧股总、股浅、腘、胫前及足背动脉内径均正常, 血管内-中膜未见明显增厚，内膜面平整, 管腔内血流均通畅。_x000D_ 两侧股总静脉、股浅静脉、腘静脉、胫后静脉未见扩张，以上血管内膜面平整, 管腔内未探及异常回声，探头加压管腔可压闭，CDFI示血流通畅。_x000D_ 两侧小腿后侧肌群肌纹理清晰，未见明显异常团块回声，肌间静脉丛未见扩张，管腔内未探及异常回声，探头加压管腔可压闭，CDFI示血流充盈良好。	2.86	1.6	13.3	子宫＋双侧附件：_x000D_ _x000D_ 1.子宫平滑肌瘤；_x000D_ _x000D_ 2.宫颈慢性炎，灶区伴低度鳞状上皮内病变（湿疣样变）；_x000D_ _x000D_ 3.老年萎缩性子宫内膜；_x000D_ _x000D_ 4.一侧卵巢包涵囊肿，另一侧卵巢未见特异；_x000D_ _x000D_ 5.双侧输卵管未见特异。	8.9	0.7	6.7	3.85	0.29	2.48	1	0	145	270	0	10.9	1
330324-1000363554	656549	毛*珍	2019-03-08 15:30:00						“子宫”平滑肌瘤，灶区伴粘液变性。							656549	肌瘤	46	1	0	2	1	3	0	发现盆腔包块2年	1	2	165	75	27.5482	双下肢深静脉无明显异常发现	两侧股总静脉、股浅静脉、腘静脉、胫后静脉及小腿肌间静脉丛未见扩张，以上血管内膜面平整, 血流通畅。	1.8	1.2	26.9	“子宫”平滑肌瘤，灶区伴粘液变性。	5.9	0.9	8.76	6.19	0.48	1.93	1	0	142	328	0	9.8	1
330381-8201790855	1405408	李*华	2017-08-04 13:20:00						送检“子宫及双输卵管”标本：_x000D_ 1、子宫多发性平滑肌瘤。_x000D_ 2、宫颈息肉。_x000D_ 3、宫颈慢性炎。_x000D_ 4、老年性宫内膜。_x000D_ 5、双侧输卵管未见特异。							1405408	全子宫+双侧输卵管	51	1	0	2	1	3	0	发现盆腔包块10余年，经量增多2年，加重2月	1	1	152	53	22.9398	两侧下肢深静脉无明显异常发现	两侧股总静脉、股浅静脉、腘静脉、胫后静脉及小腿肌间静脉丛未见扩张，以上血管内膜面平整, 血流通畅。	3.19	0.6	25.6	送检“子宫及双输卵管”标本：_x000D_ 1、子宫多发性平滑肌瘤。_x000D_ 2、宫颈息肉。_x000D_ 3、宫颈慢性炎。_x000D_ 4、老年性宫内膜。_x000D_ 5、双侧输卵管未见特异。	2.7		5.55	3.19	0.60	1.84	1	0	121	195	0	12.6	1
330326-1000475499	1388309	王*叶	2017-06-08 11:10:00						子宫+双侧输卵管切除标本：_x000D_ 1、子宫多发性平滑肌瘤。_x000D_ 2、宫颈息肉_x000D_ 3、宫颈慢性炎、_x000D_ 4、老年性宫内膜。_x000D_ 5、双侧输卵管未见特异。_x000D_ “右侧卵巢”黄体囊肿。_x000D_							1388309	全子宫+双侧输卵管	52	2	0	1	2	3	0	经量增多1月余	1	1	158	59	23.634	子宫肌瘤_x000D_ 右侧卵巢囊肿	经阴道及腹部联合探查：子宫增大，宫体前位，子宫右后壁见一大小约86×77×90MM的低回声团块，边界清，内部回声不均匀。宫腔内未见明显异常回声，内膜厚8MM（双层）。右侧卵巢偏大，内见一大小约32×30MM的囊性暗区，左侧附件区未见明显异常回声。	3.84	2.8	34.1	子宫+双侧输卵管切除标本：_x000D_ 1、子宫多发性平滑肌瘤。_x000D_ 2、宫颈息肉_x000D_ 3、宫颈慢性炎、_x000D_ 4、老年性宫内膜。_x000D_ 5、双侧输卵管未见特异。_x000D_ “右侧卵巢”黄体囊肿。_x000D_	4.1		6.18	3.48	0.33	2.22	1	0	141	300	0	11.5	1
	1694261	周顺微														1694261		57	3	0	1	3	4	0	经量增加4年，发现盆腔包块20余天。	1	腹腔镜下全子宫切除术;腹腔镜下双侧输卵管切除	68.5	155	28.512			2.36	1.6	17.7		5.8		6.88	4.27	0.56	1.75	0	0	145	190	0	12.7	1
330327-1001295035	1638818	温*亚	2019-10-14 10:20:00						_x000D_ _x000D_ “子宫肌瘤”条索状组织平滑肌源性肿瘤，符合平滑肌瘤，部分区富于细胞。建议随诊。							1638818	肌瘤	41	2	0	1	2	3	0	发现盆腔包块伴增大2年	2	2	155	55.5	23.1009	两侧下肢深静脉无明显异常发现	两侧股总静脉、股浅静脉、腘静脉、胫后静脉未见扩张，以上血管内膜面平整, 血流通畅。_x000D_ 两侧小腿后侧肌群未见明显异常回声。	2.93	1.3	13.0	_x000D_ _x000D_ “子宫肌瘤”条索状组织平滑肌源性肿瘤，符合平滑肌瘤，部分区富于细胞。建议随诊。	4.0	0.5	5.28	3.02	0.3	1.91	1	0	132	183	0	11.4	1
0075190005	1193826	张*伟	2020-11-27 14:44:00						“子宫肌瘤”平滑肌瘤，部分区富于细胞性。							1193826	肌瘤	37	1	0	2	1	3	0	发现盆腔包块5年	2	2	163	53	19.9481	两侧下肢大动脉、深静脉无明显异常发现	两侧股总、股浅、腘、胫前及足背动脉内径均正常, 血管内-中膜未见明显增厚，内膜面平整, 管腔内血流均通畅。左侧足背动脉血流峰速度约30cm/s，右侧足背动脉血流峰速度约32cm/s。_x000D_ 两侧股总静脉、股浅静脉、腘静脉、胫后静脉及小腿肌间静脉丛未见扩张，以上血管内膜面平整, 血流通畅。	1.85	1.1		“子宫肌瘤”平滑肌瘤，部分区富于细胞性。			3.59	1.97	0.25	1.16	0	2	114	192	0	9.8	1
330326-1000578163	1517562	郑*金	2018-09-14 08:54:00						子宫+双侧输卵管切除标本：_x000D_ _x000D_ 1、子宫多发性平滑肌瘤。_x000D_ _x000D_ 2、宫颈慢性炎伴纳氏囊肿形成。_x000D_ _x000D_ 3、增生期宫内膜。_x000D_ _x000D_ 4、双侧输卵管未见特异。							1517562	全子宫+双侧输卵管	49	5	0	1	5	6	0	发现盆腔包块10年	2	1	152	60	25.9695	两侧乳腺增生症_x000D_ 右侧乳腺结节 BI-RADS Ⅲ类	两侧乳房均见乳腺组织局部偏厚, 腺体结构粗大，排列紊乱，可见小片状的低回声区, 乳腺主导管未见扩张。右侧乳腺内见数个低回声结节，大的约6×5×5MM，位于乳腺9B区，边界清，内部回声较均匀。		2.5	7.6	子宫+双侧输卵管切除标本：_x000D_ _x000D_ 1、子宫多发性平滑肌瘤。_x000D_ _x000D_ 2、宫颈慢性炎伴纳氏囊肿形成。_x000D_ _x000D_ 3、增生期宫内膜。_x000D_ _x000D_ 4、双侧输卵管未见特异。	5.5	0.5	4.02	1.85	0.42	1.66	0	0	104	394	1	9.4	1
0005270779	1331415	潘*兰	2020-06-22 09:00:00						1、宫颈慢性炎。_x000D_ 2、分泌期宫内膜。_x000D_ 3、子宫多发平滑肌瘤。_x000D_ 4、“双侧”输卵管积水伴一侧系膜副中肾管囊肿。							1331415	全子宫+双侧输卵管	52	2	0	0	2	2	0	发现盆腔包块10余年，经量增多1年	1	1	156	60	24.6548	盆腔无明显异常发现	膀胱充盈可，子宫未探及。盆腔内未见明显异常回声。	3	1.1	16	1、宫颈慢性炎。_x000D_ 2、分泌期宫内膜。_x000D_ 3、子宫多发平滑肌瘤。_x000D_ 4、“双侧”输卵管积水伴一侧系膜副中肾管囊肿。	5.4	0.7	4.46	2.69	0.31	1.28	0	0	76	221	0
0075265279	1440238	蔡*娟	2017-12-11 13:10:00						“子宫”平滑肌瘤。							1440238	肌瘤	37	0	1	0	1	1	0	经期延长，经量增多3月	1	1	145	42	19.9762	肝胆脾胰无明显异常发现_x000D_ 肾输尿管及膀胱无明显异常发现	肝脏大小正常, 内部回声纤细, 均匀, 血管网络清晰，门静脉主干内径正常。右肝前叶见一长径约6MM的强回声光斑，有声影，周围胆管无扩张（肝内钙化灶）。胆囊大小正常, 囊壁薄, 囊内未见异常回声。胆总管及肝内胆管无扩张。脾脏无肿大。胰腺头、体部未见明显异常回声，尾部因胃肠气体遮盖显示不清。_x000D_ 两肾形态大小及内部回声正常。两侧输尿管无扩张。膀胱内未见明显异常回声。	3.14	1.9	22.6	“子宫”平滑肌瘤。	3.0	0.8	11.65	8.7	0.46	2.45	1	0	91	375	0
330327-1000571868	1389595	尤*西	2017-06-08 12:47:00						子宫+双侧输卵管切除标本：_x000D_ 1、子宫多发性平滑肌瘤。_x000D_ 2、增生期宫内膜。_x000D_ 3、宫颈慢性炎。_x000D_ 4、另一侧输卵管系膜副中肾管囊肿；一侧输卵管未见特异。							1389595	全子宫+双侧输卵管	45	2	0	1	2	3	0	经量增多3年余	1	1	160	66	25.7812	子宫肌瘤（已定位）_x000D_ 盆腔少量积液_x000D_ _x000D_ （肌瘤之间由于声衰减或者位置关系存在遮挡可能，超声所示肌瘤个数及位置仅供临床医生参考）	经阴道探查：子宫大小正常，宫体后位，三径××MM，宫壁回声正常，宫腔内未见明显异常回声，内膜厚9MM（双层）。两侧卵巢大小及内部回声正常。盆腔内可探及深约15MM的液性暗区。_x000D_ 底部见一大小约53×38×53MM的低回声结节，少部分向宫腔内凸，距浆膜层约3MM，_x000D_ 前壁见数个低回声结节，约16×10×14MM，距浆膜层约8MM，10×6×10MM，距浆膜层约6MM，_x000D_ 后壁见一大小约16×10×12MM的低回声结节，距浆膜层约3MM，_x000D_ 以上结节边界清，内部回声欠均匀。_x000D_	2.19	0.5	6.3	子宫+双侧输卵管切除标本：_x000D_ 1、子宫多发性平滑肌瘤。_x000D_ 2、增生期宫内膜。_x000D_ 3、宫颈慢性炎。_x000D_ 4、另一侧输卵管系膜副中肾管囊肿；一侧输卵管未见特异。			5.24	3.46	0.28	1.47	0	1	81	302	0	10.4	1
00019500010024	1506854	陈*珍	2018-08-27 13:14:00						1.子宫多发平滑肌瘤。_x000D_ _x000D_ 2.宫壁分泌早期子宫内膜。_x000D_ _x000D_ 3.宫颈、双侧输卵管未见特异。							1506854	全子宫+双侧输卵管	40	2	0	2	2	4	0	自觉腹围增大3月	2	1	162	48	18.2899	两侧下肢深静脉无明显异常发现	两侧股总静脉、股浅静脉、腘静脉、胫后静脉及小腿肌间静脉丛未见扩张，以上血管内膜面平整, 血流通畅。	1.24	2.9	14.8	1.子宫多发平滑肌瘤。_x000D_ _x000D_ 2.宫壁分泌早期子宫内膜。_x000D_ _x000D_ 3.宫颈、双侧输卵管未见特异。	7.5	0.5	6.33	4.34	0.33	1.55	0	0	104	392	1	9.2	1
	1857805	孙周黛														1857805		49	3	0	3	3	6	0	发现盆腔包块10年，经量增多4月。	1	腹腔镜下全子宫切除术;腹腔镜下双侧输卵管-卵巢切除术;腹腔镜下盆腔粘连松解术;腹腔镜下盆腔粘连松解术;腹腔镜下阴道残端圆韧带悬吊术;腹腔镜下肠系膜病损切除术	60	155	24.974			1.6	0.5	13		5.3		5.51	4.01	0.33	1.07	0	2	74	338	0	8.8	0
	525741	支秀英														525741		51	1	0	1	1	2	0	经期延长4年，发现盆腔包块2年	1	子宫全切除术	55	160	21.4844									7.2	5.5	0.4	1.3	0	1	140	160	0	12.9	1
330327-1000432949	1205547	蔡*君	2015-05-21 14:50:00						1、“子宫”平滑肌瘤。_x000D_ 2、子宫内膜呈简单型增生过长。							1205547	肌瘤	37	1	0	1	1	2	0	发现盆腔包块半月	2	2	160	53	20.7031			1.62	0.9	22.9	1、“子宫”平滑肌瘤。_x000D_ 2、子宫内膜呈简单型增生过长。	<0.8		6.09	3.3	0.42	2.32	1	0	104	451	1	10.6	1
330326-392362	1647631	王*珍	2019-11-07 11:15:00						1.“子宫”平滑肌瘤。_x000D_ _x000D_ 2.“右”输卵管系膜副中肾管囊肿。_x000D_ _x000D_ 3.“左卵巢结节”镜下见为白体结节。_x000D_ _x000D_ 4.“右卵巢肿瘤”囊性成熟性畸胎瘤。							1647631	肌瘤	37	2	0	0	2	2	0	发现盆腔包块3年，经量增多1年	1	2	157	56.5	22.9218	子宫肌瘤_x000D_ 两侧卵巢畸胎瘤_x000D_ _x000D_ （肌瘤之间由于声衰减或者位置关系存在遮挡可能，超声所示肌瘤个数及位置仅供临床医生参考）	经阴道探查：子宫偏大，宫体后位，宫颈壁内见数个囊性暗区，大的约7×5mm，囊壁光滑（宫颈囊肿），宫体前壁近宫腔见一大小约48×36×56mm的低回声团块，边界清，内部回声不均匀，内膜受压移位，内膜厚4mm（双层）。两侧卵巢大小正常，内均见一偏强回声结节，左侧约9×8×10mm，右侧约19×13×17mm，边界清，内部回声欠均匀。_x000D_ _x000D_ _x000D_	2.27	1.1	11.6	1.“子宫”平滑肌瘤。_x000D_ _x000D_ 2.“右”输卵管系膜副中肾管囊肿。_x000D_ _x000D_ 3.“左卵巢结节”镜下见为白体结节。_x000D_ _x000D_ 4.“右卵巢肿瘤”囊性成熟性畸胎瘤。	2.7	0.5	5.4	2.86	0.44	1.9	1	0	113	362	0	10.8	1
330327-1000760975	1722012	温*花	2020-09-08 09:00:00						子宫+双侧输卵管标本：_x000D_ _x000D_ 1、子宫多发性平滑肌瘤。_x000D_ _x000D_ 2、宫颈慢性炎伴纳氏囊肿。_x000D_ _x000D_ 3、分泌期宫内膜。_x000D_ _x000D_ 4、双侧输卵管未见特异，一侧输卵管系膜处见副中肾管囊肿。							1722012	全子宫+双侧输卵管	48	4	0	1	4	5	0	发现盆腔包块3年余	2	1	157	60	24.3418	两侧下肢大动脉无明显异常发现_x000D_ 两侧下肢深静脉无明显异常发现	两侧股总、股浅、腘、胫前、胫后、腓及足背动脉内径尚正常, 以上血管内-中膜无明显增厚，内膜面平整, 管腔内血流均通畅, 左侧足背动脉血流峰速度约16cm/s，右侧足背动脉血流峰速度约21cm/s。 _x000D_ 两侧股总静脉、股浅静脉、腘静脉、胫后静脉未见扩张，以上血管内膜面光滑, 平整, 血流通畅，血流速度随深呼吸波动明显。	2.17	1.6	8.8	子宫+双侧输卵管标本：_x000D_ _x000D_ 1、子宫多发性平滑肌瘤。_x000D_ _x000D_ 2、宫颈慢性炎伴纳氏囊肿。_x000D_ _x000D_ 3、分泌期宫内膜。_x000D_ _x000D_ 4、双侧输卵管未见特异，一侧输卵管系膜处见副中肾管囊肿。	6.5		5.84	3.44	0.4	1.88	1	0	126	188	0	10.5	1
0076008268	1639406	夏*珍	2019-10-15 20:07:00						1.“肌瘤”平滑肌瘤。_x000D_ 2.“左侧卵巢囊肿壁”符合卵巢滤泡囊肿。							1639406	肌瘤	35	1	0	2	1	3	0	发现盆腔包块4年	2	2	147	52.5	24.2954	子宫肌瘤	经阴道探查：子宫增大，宫体前位，前壁见一大小约66×51×67mm的低回声团块，边界清，内部回声不均匀，部分向宫外突出。宫腔内未见明显异常回声，内膜厚7mm（双层）。两侧卵巢大小及内部回声正常。	2.8	0.7	26.8	1.“肌瘤”平滑肌瘤。_x000D_ 2.“左侧卵巢囊肿壁”符合卵巢滤泡囊肿。			7.04	4.27	0.49	2.18	1	0	117	347	0	12.1	1
330382-0080985085	1698151	陈*女	2020-06-23 08:58:00						1、“子宫”平滑肌瘤。_x000D_ 2、“右输卵管系膜”副中肾管囊肿。_x000D_ 3、子宫内膜呈增生期图像。							1698151	肌瘤	45	1	0	0	1	1	0	发现盆腔包块10年，经量增多1年余	1	2	164	68	25.2826	肾输尿管及膀胱无明显异常发现_x000D_ _x000D_ （注：急诊超声检查提供信息有限，请酌情参考。）	急诊超声检查：_x000D_ 两肾大小及内部回声正常。两侧输尿管无扩张。膀胱充盈可，内未见明显异常回声。_x000D_ 排尿后膀胱内未见明显残余尿。_x000D_	3.53	0.8	8.7	1、“子宫”平滑肌瘤。_x000D_ 2、“右输卵管系膜”副中肾管囊肿。_x000D_ 3、子宫内膜呈增生期图像。	5.6	1.4	5.69	2.95	0.53	2.13	1	0	118	251	0	11.8	1
0075053060	1596563	王*珠	2019-06-10 17:35:00						1、“子宫内膜”镜下见子宫内膜息肉样增生，腺体呈增生期图像(少数腺体呈普通型增生/简单型增生过长)，小灶区呈分泌早期图像。_x000D_ 2、“子宫”粘膜下平滑肌瘤。							1596563	全子宫+双侧输卵管	48	2	0	1	2	3	0	经量增多3年，再发1年	1	1	158	51	20.4294	两侧下肢深静脉无明显异常发现	两侧股总静脉、股浅静脉、腘静脉、胫后静脉未见扩张，以上血管内膜面平整, 血流通畅。两侧小腿肌间静脉丛未见明显曲张。	3.13	1	14.0	1、“子宫内膜”镜下见子宫内膜息肉样增生，腺体呈增生期图像(少数腺体呈普通型增生/简单型增生过长)，小灶区呈分泌早期图像。_x000D_ 2、“子宫”粘膜下平滑肌瘤。	2.9	0.7	3.27	1.67	0.42	1.13	0	2	113	276	0	10.1	1
330382-0081284083	1199591	蔡*秋	2020-04-16 11:49:00						子宫+双侧输卵管切除标本：_x000D_ _x000D_ 1、子宫多发性平滑肌瘤伴部分区富细胞；_x000D_ _x000D_ 2、增生期宫内膜伴腺体不规则增生；_x000D_ _x000D_ 3、宫颈慢性炎；_x000D_ _x000D_ 4、双侧输卵管未见特异。							1199591	子宫+双侧输卵管	48	1	0	0	1	1	0	经量增多半年	1	1	161	62.5	24.1117	肾输尿管及膀胱无明显异常发现	两肾大小及内部回声正常。两侧输尿管无扩张。膀胱充盈可，内未见明显异常回声。	2.42	1.2	14.8	子宫+双侧输卵管切除标本：_x000D_ _x000D_ 1、子宫多发性平滑肌瘤伴部分区富细胞；_x000D_ _x000D_ 2、增生期宫内膜伴腺体不规则增生；_x000D_ _x000D_ 3、宫颈慢性炎；_x000D_ _x000D_ 4、双侧输卵管未见特异。	11.5		8.56	7.05	0.47	1.57	0	1	128	258	0	10.4	1
00011411419775	1546858	左*若	2018-12-20 10:11:00						1.“子宫内膜”镜下见子宫内膜呈增生期图像，个别呈普通型增生（简单型增生过长）。_x000D_ 2.“子宫”平滑肌瘤。_x000D_ 3.“右侧输卵管系膜”副中肾管囊肿。							1546858	肌瘤	43	2	0	1	2	3	0	发现盆腔包块10余年	2	2	165	57	20.9366	子宫肌瘤_x000D_ 子宫内膜回声改变_x000D_ 左侧卵巢囊肿_x000D_ _x000D_ （肌瘤之间由于声衰减或者位置关系存在遮挡可能，超声所示肌瘤个数及位置仅供临床医生参考）	经阴道探查：子宫增大，三径87×81×88mm，宫体前位，宫颈壁内见数个囊性暗区，大的约8×6mm，囊壁光滑（宫颈囊肿），宫腔内未见明显异常回声，内膜厚11mm（双层），内部回声分布不均匀，可见数个细小的液性暗区。左侧卵巢大小正常，内见一大小约30×22mm的囊性暗区。右侧卵巢大小及内部回声正常。宫体壁内见数个低回声结节及团块，大致如下：_x000D_ 右侧壁见一大小约51×36×46mm的低回声团块，外缘距浆膜层约4mm；_x000D_ 右后壁近底部见二个相邻的低回声团块，大小分别约41×27×33mm、12×9mm，部分向宫外突出；_x000D_ 底部见一大小约14×9×18mm的低回声结节，外缘紧贴浆膜层；_x000D_ 前壁近底部见一大小约34×25×28mm的低回声团块，外缘距浆膜层约2mm；_x000D_ 后壁近底部见一大小约10×6mm的低回声结节，外缘距浆膜层约5mm。_…	2.98	1	35.1	1.“子宫内膜”镜下见子宫内膜呈增生期图像，个别呈普通型增生（简单型增生过长）。_x000D_ 2.“子宫”平滑肌瘤。_x000D_ 3.“右侧输卵管系膜”副中肾管囊肿。	6.3	0.6	4.6	2.7	0.34	1.45	0	1	130	202	0	10.2	1
0004057254	1538374	卢*凤	2018-11-26 17:07:00						1.“子宫”平滑肌瘤。_x000D_ _x000D_ 2.“右”输卵管系膜副中肾管囊肿。							1538374	肌瘤	44	1	0	3	1	4	0	发现盆腔包块6年	2	2	154	55	23.1911	两侧下肢深静脉无明显异常发现	两侧股总静脉、股浅静脉、腘静脉、胫后静脉及小腿肌间静脉未见扩张，管腔内未探及异常回声，探头加压管腔可压闭。CDFI示血流通畅。			14.1	1.“子宫”平滑肌瘤。_x000D_ _x000D_ 2.“右”输卵管系膜副中肾管囊肿。			6.78	4.37	0.37	2.01	1	0	128	286	0	10.1	1
0075059114	1528054	项*玲	2018-10-19 11:40:00						_x000D_ “子宫肌瘤”符合平滑肌瘤。							1528054	肌瘤	36	2	0	1	2	3	0	发现盆腔包块7年余	2	2	159	55	21.7555	两侧下肢深静脉无明显异常发现	两侧股总静脉、股浅静脉、股深静脉、腘静脉及小腿肌间静脉丛未见明显扩张，以上血管内膜面平整, 管腔内血流通畅。	1.6	1	17.7	_x000D_ “子宫肌瘤”符合平滑肌瘤。	5.1	0.7	5.18	3.04	0.45	1.64	0	0	120	216	0	10.9	1
0070469004	1312512	徐*玲	2019-03-20 12:30:00						1.“子宫”平滑肌瘤。_x000D_ _x000D_ 2.“左、右侧”输卵管系膜副中肾管囊肿。							1312512	肌瘤	45	1	0	1	1	2	0	发现盆腔包块伴增大5年余	2	2	160	49	19.1406	两侧下肢深静脉无明显异常发现	两侧股总静脉、股浅静脉、腘静脉、胫后静脉及小腿肌间静脉丛未见扩张，以上血管内膜面平整, 血流通畅。	2.13	1.6	31.6	1.“子宫”平滑肌瘤。_x000D_ _x000D_ 2.“左、右侧”输卵管系膜副中肾管囊肿。	8.6	0.9	5.86	3.47	0.34	1.99	1	0	140	255	0	10.2	1
	1214849	温丽仙														1214849		47	2	0	3	2	5	0	发现盆腔包块6年，月经改变2年，包块增大1月	1	腹腔镜下子宫平滑肌瘤剔除术，2次手术.腹腔镜下盆腔粘连松解术;腹腔镜辅助经阴道全子宫切除术[LAVH手术];腹腔镜下双侧输卵管-卵巢切除术	63	155	26.2227			3.03	1.1	12.3		0.8		7.04	4.42	0.57	2.01	1	0	94	286	0	10.8	1
0075996594	1489404	黄*华	2019-02-12 09:00:00						“子宫”内膜息肉样改变，腺体呈分泌期图像。							1489404	肌瘤	46	2	0	0	2	2	0	发现盆腔包块10年，自觉下腹包块2月	2	2	155	65	27.0552	子宫肌瘤_x000D_ _x000D_ （肌瘤之间由于声衰减或者位置关系存在遮挡可能，超声所示肌瘤个数及位置仅供临床医生参考）	经阴道探查：子宫增大，宫体前位，宫腔内未见明显异常回声，内膜厚16mm（双层），内部回声欠均匀，右侧卵巢大小正常，内见一大小约19×18×19mm的囊性暗区，囊内充满细小光点样回声。左侧卵巢大小及内部回声正常。_x000D_ 子宫右前壁下段见一大小约53×38×56mm的低回声团块，部分向宫外突出，紧贴浆膜层，_x000D_ 子宫左前壁下段见一大小约44×35×43mm的低回声团块，部分向宫外突出，紧贴浆膜层，边界清，内部回声欠均匀。	2.4	0.7	30.9	“子宫”内膜息肉样改变，腺体呈分泌期图像。	11.3		7.68	5.24	0.5	1.77	0	0	103	282	0	10.8	1
330322-955908	1575134	陈*香	2019-03-29 10:06:00						1.子宫多发性平滑肌瘤伴粘液变性及玻璃样变。_x000D_ _x000D_ 2.宫颈慢性炎。_x000D_ _x000D_ 3.增生期宫内膜 。_x000D_ _x000D_ 4.一侧输卵管未见特异，另一侧输卵管积水。							1575134	全子宫+双侧输卵管	51	1	1	4	2	6	0	发现盆腔包块3年，下腹痛1月	3	1	158	64	25.6369	子宫肌瘤（肌壁间及浆膜下）_x000D_ _x000D_ （肌瘤之间由于声衰减或者位置关系存在遮挡可能，超声所示肌瘤个数及位置仅供临床医生参考）	经阴道及腹部联合探查：子宫增大，宫体前位，子宫下段见一大小约103×68×106mm的低回声团块，边界清，内部回声不均匀，紧贴子宫右侧壁见一大小约31×25×35mm的低回声团块，边界清，内部回声不均匀，宫腔内未见明显异常回声，内膜厚7mm（双层）。两侧卵巢偏小，内部回声未见明显异常。			7.6	1.子宫多发性平滑肌瘤伴粘液变性及玻璃样变。_x000D_ _x000D_ 2.宫颈慢性炎。_x000D_ _x000D_ 3.增生期宫内膜 。_x000D_ _x000D_ 4.一侧输卵管未见特异，另一侧输卵管积水。		0.6	4.01	2.14	0.21	1.61	0	0	94	371	0	9.7	1
330381-0000235016	1730919	陈*珍	2020-10-15 09:05:00						“子宫肌瘤1”平滑肌瘤。							1730919	肌瘤	42	2	0	4	2	6	0	发现盆腔包块10年，经量增多1年余	1	2	164	60	22.3081	两侧下肢大动脉无明显异常发现_x000D_ 两侧下肢深静脉无明显异常发现	两侧股总、股浅、腘、胫前及足背动脉内径均正常, 血管内-中膜未见明显增厚，内膜面平整, 管腔内血流均通畅。左侧足背动脉血流峰速度约34cm/s，右侧足背动脉血流峰速度约40cm/s。_x000D_ 两侧股总静脉、股浅静脉、腘静脉、胫后静脉及小腿肌间静脉丛未见扩张，以上血管内膜面平整, 血流通畅。	1.55	0.6	15.7	“子宫肌瘤1”平滑肌瘤。	10.3		5.9	3.04	0.38	2.31	1	0	131	231	0	10.4	1
330381-0075542173	1479137	许*妹	2018-05-02 16:25:00						1、“子宫内膜”子宫内膜呈增生反应。_x000D_ 2、“子宫”平滑肌瘤。_x000D_ 3、“右侧输卵管系膜”副中肾管囊肿。							1479137	肌瘤	47	1	0	3	1	4	0	发现盆腔包块10年	2	2	153	56	23.9224	肝内结节 考虑血管瘤_x000D_ 左肾结石_x000D_ 左肾囊肿（囊壁部分钙化）	肝脏大小正常, 内部回声纤细, 均匀, 血管网络清晰，门静脉主干内径正常。右肝下段见一12×8MM的偏高回声结节，边界清, 内部回声欠均匀。胆囊大小正常，囊壁薄，囊内未见异常回声。胆总管及肝内胆管无扩张。脾脏无肿大。胰腺头、体部未见明显异常回声，尾部因胃肠气体遮盖显示不清。_x000D_ 两肾大小正常，左肾下极集合系统内见一颗长径约3.5MM的强回声光团，有声影。左肾中下极皮质内见一大小约12×11MM的囊性暗区，囊壁回声局部增强呈光点样，有声影。两侧输尿管无扩张。膀胱过度充盈，内未见明显异常回声。	3.55	0.8	19.7	1、“子宫内膜”子宫内膜呈增生反应。_x000D_ 2、“子宫”平滑肌瘤。_x000D_ 3、“右侧输卵管系膜”副中肾管囊肿。	5.5		4.82	3.48	0.18	1.12	0	2	131	291	0	11.1	1
330381-0001351207	1614254	周*如	2019-07-26 13:08:00						1、子宫+双输卵管标本：_x000D_ （1）子宫多发性平滑肌瘤。_x000D_ （2）分泌期宫内膜_x000D_ （3）宫颈慢性炎。_x000D_ （4）一侧输卵管系膜副中肾管囊肿，双侧输卵管组织未见特异。_x000D_ _x000D_ 2、“圆韧带肌瘤”平滑肌瘤伴玻璃样变性。							1614254	全子宫+双侧输卵管	50	1	0	6	1	7	0	子宫肌瘤剥除术后14年，再发盆腔包块12年	2	1	164	70	26.0262	肾输尿管及膀胱无明显异常发现	两肾形态大小及内部回声正常。两侧输尿管无扩张。膀胱充盈差，内未见明显异常回声。	1.2	2	29.8	1、子宫+双输卵管标本：_x000D_ （1）子宫多发性平滑肌瘤。_x000D_ （2）分泌期宫内膜_x000D_ （3）宫颈慢性炎。_x000D_ （4）一侧输卵管系膜副中肾管囊肿，双侧输卵管组织未见特异。_x000D_ _x000D_ 2、“圆韧带肌瘤”平滑肌瘤伴玻璃样变性。	2.4		6.11	3.94	0.28	1.67	0	0	134	189	0	11.9	1
	1374464	孙玉芬														1374464		43	2	0	0	2	2	0	经期延长伴经量增多6月	1	腹腔镜下子宫病损切除术;宫腔镜检查;(双侧)腹腔镜下输卵管系膜囊肿剔除术2 术后补充腹腔镜下全子宫切除术;腹腔镜下双侧输卵管-卵巢切除术;腹腔镜下盆腔淋巴结根治性切除术;	53	158	21.2306			2.66	0.9	15.6		3.4		4.7	2.93	0.37	1.35	0	1	63	355	0	11.9	1
	555989	王文华														555989		58	3	0	1	2	4	1	体检发现盆腔包块1年余.	2	子宫全切除术+双附件切除术	55.5	152	24.0218									14.4	11.5	0.6	2.2	1	0	134	296	0	7.5	0
0077653037	1412062	徐*冬	2017-08-28 15:25:00						1、增生期宫内膜。_x000D_ 2、子宫平滑肌瘤。							1412062	肌瘤	42	2	0	1	2	3	0	发现盆腔包块8年余，尿失禁2年	2	2	164	52	19.3337	子宫肌瘤_x000D_ 子宫内膜回声改变 内膜息肉？_x000D_ _x000D_ （肌瘤之间由于声衰减或者位置关系存在遮挡可能，超声所示肌瘤个数及位置仅供临床医生参考）	经阴道探查：子宫增大，宫体后位，宫腔内未见明显异常回声，内膜厚9MM（双层），内部回声不均匀，局部回声增强呈结节状，范围约7×4×9MM。右侧卵巢大小及内部回声正常。左侧卵巢未探及。宫壁内见数个低回声团块，边界清，内部回声不均匀，如下所述：_x000D_ 子宫前壁见一大小约58×40×55MM的低回声团块，部分向宫外突出；_x000D_ 子宫后壁近底部见一大小约16×11×14MM的低回声结节，其外缘距浆膜层2.7MM；_x000D_ 子宫后壁见一大小约14×9×16MM的低回声结节，其外缘距浆膜层3.0MM。	1.49	0.6	7.9	1、增生期宫内膜。_x000D_ 2、子宫平滑肌瘤。	6.2		5.31	2.56	0.49	2.13	1	0	125	164	0	12.0	1
330382-0000041487	1653041	黄*珍	2019-11-25 12:30:00						子宫及双附件标本：_x000D_ _x000D_ 1、子宫平滑肌瘤。_x000D_ _x000D_ 2、宫颈慢性炎。_x000D_ _x000D_ 3、萎缩性宫内膜。_x000D_ _x000D_ 4、双侧附件未见明显特异。_x000D_ _x000D_ _x000D_							1653041	全子宫+双侧附件	61	2	0	1	2	3	1	发现盆腔包块8年	2	1	155	65	27.0552	两侧小腿肌间静脉血流淤滞状态_x000D_ _x000D_ _x000D_ （注：床旁超声检查提供信息有限，请酌情参考。）	急诊床旁超声检查：_x000D_ 两侧股总静脉、股浅静脉、腘静脉、胫后静脉未见扩张，以上血管内膜面平整, 血流通畅。_x000D_ 两侧小腿肌间静脉未见明显扩张，管腔内血流缓慢，呈自发造影现象。	3.86	1.2	7.6	子宫及双附件标本：_x000D_ _x000D_ 1、子宫平滑肌瘤。_x000D_ _x000D_ 2、宫颈慢性炎。_x000D_ _x000D_ 3、萎缩性宫内膜。_x000D_ _x000D_ 4、双侧附件未见明显特异。_x000D_ _x000D_ _x000D_	9.8		4.96	2.3	0.4	2.08	1	0	141	316	0	10.2	1
330382-0081065770	1260527	邱*珠	2015-12-29 17:02:00						1、“左”卵巢囊性成熟性畸胎瘤。_x000D_ 2、“宫颈”粘膜慢性炎伴鳞化累腺。_x000D_ 3、增生期子宫内膜。_x000D_ 4、子宫平滑肌瘤。_x000D_ 5、双侧输卵管粘膜慢性炎。							1260527	全子宫+双侧输卵管	45	1	0	0	1	1	0	发现盆腔包块20年	2	1	158	60	24.0346			1.96	0.8	14.0	1、“左”卵巢囊性成熟性畸胎瘤。_x000D_ 2、“宫颈”粘膜慢性炎伴鳞化累腺。_x000D_ 3、增生期子宫内膜。_x000D_ 4、子宫平滑肌瘤。_x000D_ 5、双侧输卵管粘膜慢性炎。	9.8	0.7	6.79	4.4	0.5	1.85	1	0	128	264	0	11.8	1
0004979300	1719119	郑*春	2020-08-31 10:38:00						“子宫肌瘤”血管平滑肌瘤伴玻璃样变。							1719119	肌瘤	49	1	0	1	1	2	0	发现盆腔包块2月余	2	2	153	50.5	21.5729	两侧下肢深静脉及小腿后侧肌群无明显异常发现_x000D_	两侧股总静脉、股浅静脉、腘静脉、胫后静脉及腓静脉未见扩张，以上血管内膜面平整, 管腔内未探及异常回声，探头加压管腔可压闭，CDFI示血流通畅。_x000D_ 两侧小腿后侧肌群肌纹理清晰，未见明显异常团块回声，肌间静脉丛未见扩张，管腔内未探及异常回声，探头加压管腔可压闭，CDFI示血流充盈良好。	4.9	1.2	14.1	“子宫肌瘤”血管平滑肌瘤伴玻璃样变。	2.4		6.35	4.24	0.25	1.83	1	0	128	216	0	11.0	1
330381-0001247713	1562696	姜*吴	2019-02-13 13:15:00						“子宫”平滑肌瘤。							1562696	肌瘤	39	2	0	1	2	3	0	发现盆腔包块5年你，显著增大2年	2	2	150	47	20.8889	患者已吃，报告作废	患者已吃，报告作废	2	1.1	9.5	“子宫”平滑肌瘤。	＜2		4.78	3.19	0.26	1.29	0	1	122	137	0	9.4	1
	1727253	李彩玉														1727253		41	2	0	3	2	5	0	体检发现盆腔包块1年余，月经改变2月余	1	腹腔镜下子宫平滑肌瘤剔除术;2冰冻后腹腔镜下全子宫切除术;腹腔镜下双侧输卵管切除术;腹腔镜下盆腔粘连松解术	80	158	32.0461			2.88	1	16.3		4.2		6.86	3.91	0.58	2.32	1	0	99	394	1	8.8	0
330327-1000958284	1652879	钟*芬	2019-11-26 14:16:00						1.“子宫肌瘤”平滑肌瘤伴玻璃样变性。_x000D_ 2.“右输卵管系膜囊肿”副中肾管囊肿。							1652879	肌瘤	40	1	0	4	1	5	0	发现盆腔包块10余年，经期缩短1年	1	2	158	62	24.8358	两侧下肢深静脉无明显异常发现	两侧股总静脉、股浅静脉、腘静脉、胫后静脉未见扩张，以上血管内膜面平整, 血流通畅。两侧小腿后侧肌群未见明显异常回声。	2.6	1.7	17.6	1.“子宫肌瘤”平滑肌瘤伴玻璃样变性。_x000D_ 2.“右输卵管系膜囊肿”副中肾管囊肿。	3.8	0.4	7.49	5.24	0.43	1.73	0	0	139	394	1	10.0	1
330324-1000595006	1693349	周*玉	2020-06-03 13:03:00						子宫及双侧输卵管切除标本：_x000D_ 1.子宫平滑肌瘤。_x000D_ 2.宫颈慢性炎伴宫颈息肉。_x000D_ 3.萎缩性宫内膜。_x000D_ 4.双侧输卵管未见明显特异。							1693349	全子宫+双侧输卵管	54	3	0	0	3	3	0	发现盆腔包块7年余，阴道流血半月余	1	1	160	57.5	22.4609	左侧小腿肌间静脉丛曲张_x000D_ _x000D_ （注：床旁超声检查提供信息有限，请酌情参考）	急诊床旁超声检查：_x000D_ 两侧股总静脉、股浅静脉、腘静脉、胫后静脉及右侧小腿肌间静脉未见扩张，以上血管内膜面平整, 血流通畅。左侧小腿肌间静脉丛曲张，最宽处内径约7mm，管腔内血流尚通畅。_x000D_ 两侧小腿后侧肌群肌纹理清晰，未见明显异常团块回声。	3.8	1.7	7.6	子宫及双侧输卵管切除标本：_x000D_ 1.子宫平滑肌瘤。_x000D_ 2.宫颈慢性炎伴宫颈息肉。_x000D_ 3.萎缩性宫内膜。_x000D_ 4.双侧输卵管未见明显特异。	＜2		4.91	2.85	0.32	1.73	0	0	139	263	0	10.1	1
00011412006320	1658582	李*玲	2019-12-16 17:39:00						子宫+双附件标本：_x000D_ 1、送检“盆腔肿物”为平滑肌瘤。_x000D_ 2、宫颈慢性炎。_x000D_ 3、子宫多发性平滑肌瘤。_x000D_ 4、左卵巢良性囊肿，首先考虑间皮囊肿。_x000D_ 5、右卵巢及双侧输卵管未见明显特异。_x000D_ 6、子宫内膜待标本重取。_x000D_ _x000D_ 标本重取后补充报告：_x000D_ _x000D_ 萎缩性子宫内膜。_x000D_ 子宫腺肌症。							1658582	全子宫+双侧附件	56	1	0	2	1	3	1	发现盆腔包块4月余	2	1	155	50.5	21.0198	左侧小腿肌间静脉曲张伴血流瘀滞状态	两侧股总静脉、股浅静脉、腘静脉、胫后静脉未见扩张，以上血管内膜面平整, 血流通畅。_x000D_ 左侧小腿肌间静脉丛见一条管腔样回声，最宽处约7mm，管腔内血流缓慢，呈自发造影现象。右侧小腿后侧肌群内未见明显异常回声。	4.21	2.3	6.1	子宫+双附件标本：_x000D_ 1、送检“盆腔肿物”为平滑肌瘤。_x000D_ 2、宫颈慢性炎。_x000D_ 3、子宫多发性平滑肌瘤。_x000D_ 4、左卵巢良性囊肿，首先考虑间皮囊肿。_x000D_ 5、右卵巢及双侧输卵管未见明显特异。_x000D_ 6、子宫内膜待标本重取。_x000D_ _x000D_ 标本重取后补充报告：_x000D_ _x000D_ 萎缩性子宫内膜。_x000D_ 子宫腺肌症。	13.8	1.7	5.53	3.1	0.51	1.84	1	0	126	214	0	10.4	1
330329-1000455871	1418309	唐*春	2017-09-19 09:00:00						1、“子宫”平滑肌瘤。_x000D_ _x000D_ 2、“右”输卵管系膜副中肾管囊肿。							1418309	肌瘤	38	2	0	1	2	3	0	经期延长2月	1	2	158	57	22.8329	两下肢深静脉无明显异常发现	两侧股总静脉、股浅静脉、腘静脉、胫后静脉未见扩张，以上血管内膜面平整, 血流通畅。	3.2	1.4	14.6	1、“子宫”平滑肌瘤。_x000D_ _x000D_ 2、“右”输卵管系膜副中肾管囊肿。	15.9	0.7	5.87	3.07	0.51	2.13	1	0	90	329	0	9.4	1
330382-0000115621	1689397	杨*乐	2020-05-21 12:07:00						1、子宫+双侧输卵管标本：_x000D_ _x000D_ 1）子宫多发平滑肌瘤，部分区富于细胞。_x000D_ 2）宫颈慢性炎。_x000D_ 3）增生期宫内膜。_x000D_ 4）双侧输卵管未见特异，可见系膜副中肾管囊肿。_x000D_ _x000D_ 2、“右卵巢囊肿”符合滤泡囊肿伴出血。							1689397	全子宫+双侧输卵管	45	1	0	2	1	3	0	经量增多10年	1	1	158	85	34.049	双下肢深静脉及小腿后侧肌群无明显异常发现_x000D_ _x000D_ （注：床旁超声检查提供信息有限，请酌情参考）	急诊床旁超声检查：_x000D_ 两侧股总静脉、股浅静脉、腘静脉、胫后静脉及腓静脉未见扩张，以上血管内膜面平整, 管腔内未探及异常回声，探头加压管腔可压闭，CDFI示血流通畅。_x000D_ 两侧小腿后侧肌群肌纹理清晰，未见明显异常团块回声，肌间静脉丛未见扩张，管腔内未探及异常回声，探头加压管腔可压闭，CDFI示血流充盈良好。	3.64	1.2	12.2	1、子宫+双侧输卵管标本：_x000D_ _x000D_ 1）子宫多发平滑肌瘤，部分区富于细胞。_x000D_ 2）宫颈慢性炎。_x000D_ 3）增生期宫内膜。_x000D_ 4）双侧输卵管未见特异，可见系膜副中肾管囊肿。_x000D_ _x000D_ 2、“右卵巢囊肿”符合滤泡囊肿伴出血。	3.4	0.8	6	3.17	0.35	2.43	1	0	124	301	0	9.8	1
330327-1000289445	1603136	夏*分	2019-06-24 15:53:00						1、“宫颈管”慢性炎。_x000D_ _x000D_ 2、“子宫肌瘤2”平滑肌瘤。							1603136	肌瘤	47	3	0	0	3	3	0	发现盆腔包块伴月经量增多6年余	1	2	155	66	27.4714	两侧下肢深静脉无明显异常发现	两侧股总静脉、股浅静脉、腘静脉、胫后静脉及小腿肌间静脉丛未见扩张，以上血管内膜面平整, 血流通畅。	1.3	0.9	10.5	1、“宫颈管”慢性炎。_x000D_ _x000D_ 2、“子宫肌瘤2”平滑肌瘤。	7.2	0.4	4.16	2.65	0.39	1.08	0	2	80	299	0
330327-1002529667	1501938	潘*丽	2018-08-02 13:58:00						1、子宫多发性平滑肌瘤。_x000D_ 2、增生期宫内膜。_x000D_ 3、宫颈慢性炎。_x000D_ 4、一侧输卵管系膜副中肾管囊肿，另一侧输卵管未见明显特异。_x000D_							1501938	全子宫+双侧输卵管	46	2	0	1	2	3	0	发现盆腔包块1年余	2	1	156	53	21.7784	两侧下肢深静脉无明显异常发现_x000D_ _x000D_ _x000D_ （注：急诊超声检查提供信息有限，请酌情参考。）	急诊超声检查：_x000D_ 两侧股总静脉、股浅静脉、腘静脉、胫后静脉未见扩张，以上血管内膜面平整, 血流通畅。	1.19	1.9	8.0	1、子宫多发性平滑肌瘤。_x000D_ 2、增生期宫内膜。_x000D_ 3、宫颈慢性炎。_x000D_ 4、一侧输卵管系膜副中肾管囊肿，另一侧输卵管未见明显特异。_x000D_	7.7	0.9	5.87	3.51	0.5	1.74	0	0	80	376	0	10.4	1
330327-1001227684	1645553	蔡*珠	2019-11-06 14:15:00						1、“外阴皮赘”皮内痣。_x000D_ _x000D_ 2、“子宫”平滑肌瘤。_x000D_ _x000D_ 3、“右侧”输卵管慢性化脓性炎。							1645553	肌瘤	43	0	0	3	0	3	0	发现盆腔包块7年余，经期延长10余天	1	2	160	55	21.4844	两侧下肢大动脉无明显异常发现_x000D_ 两侧下肢深静脉无明显异常发现	两侧股总、股浅、腘、胫前及足背动脉内径均正常, 血管内-中膜未见明显增厚，内膜面平整, 管腔内血流均通畅，左侧足背动脉峰速度约26cm/s，右侧足背动脉峰速度约33cm/s。_x000D_ 两侧股总静脉、股浅静脉、腘静脉、胫后静脉未见明显扩张，以上血管内膜面平整, 血流通畅。_x000D_ 两侧小腿后侧肌群未见明显异常回声。	1.9	＜0.5	38.7	1、“外阴皮赘”皮内痣。_x000D_ _x000D_ 2、“子宫”平滑肌瘤。_x000D_ _x000D_ 3、“右侧”输卵管慢性化脓性炎。	4.3		6.56	3.45	0.59	2.31	1	0	123	389	1	10.3	1
0001010180	1611992	王*春	2019-07-18 13:03:00						全子宫+双侧附件切除标本：_x000D_ _x000D_ 1.子宫多发性平滑肌瘤。_x000D_ 2.宫颈慢性炎。_x000D_ 3.萎缩性宫内膜。_x000D_ 4.双侧卵巢未见明显特异，双侧输卵管系膜副中肾管囊肿。							1611992	全子宫+双侧附件	55	1	0	1	1	2	1	发现盆腔包块3年	2	1	152	62	26.8352	两侧小腿肌间静脉丛曲张	两侧股总静脉、股浅静脉、腘静脉、胫后静脉未见扩张，以上血管内膜面平整, 血流通畅。_x000D_ 两侧小腿肌间静脉丛均见数条管腔局部扩张，左侧最宽处内径7.5mm，右侧最宽处内径9mm，管腔内血流尚通畅。	2.78	1	4.8	全子宫+双侧附件切除标本：_x000D_ _x000D_ 1.子宫多发性平滑肌瘤。_x000D_ 2.宫颈慢性炎。_x000D_ 3.萎缩性宫内膜。_x000D_ 4.双侧卵巢未见明显特异，双侧输卵管系膜副中肾管囊肿。	<0.8	0.8	6.73	3.96	0.5	2.12	1	0	115	250	0	10.4	1
00010810470811	1502342	池*妹	2018-07-27 12:52:00						1、子宫内膜普通型增生。_x000D_ _x000D_ 2、“左输卵管系膜”副中肾管囊肿。							1502342	肌瘤	35	1	1	1	2	3	0	发现盆腔包块9月余	2	2	153	53	22.6409	两侧下肢深静脉无明显异常发现	两侧股总静脉、股浅静脉、腘静脉、胫后静脉及小腿肌间静脉丛未见扩张，以上血管内膜面平整, 血流通畅。	0.94	0.5	7.5	1、子宫内膜普通型增生。_x000D_ _x000D_ 2、“左输卵管系膜”副中肾管囊肿。	3.4	0.5	5.93	2.87	0.56	2.38	1	0	134	274	0	10.3	1
350900-352203197005182549	1654198	洪*丹	2019-11-29 09:00:00						1、“左侧”卵巢卵泡膜纤维瘤。_x000D_ 2、子宫平滑肌瘤。_x000D_ 3、增生期宫内膜。_x000D_ 4、宫颈慢性炎。_x000D_ 5、双侧输卵管未见特异。							1654198	全子宫+双侧输卵管	49	2	0	0	2	2	0	发现盆腔肿物10余年	2	1	162	64	24.3865	两侧下肢大动脉无明显异常发现_x000D_ 两侧下肢深静脉无明显异常发现	两侧股总、股浅、腘、胫前及足背动脉内径均正常, 血管内-中膜未见明显增厚，内膜面平整, 管腔内血流均通畅。左侧足背动脉峰速度约37cm/s，右侧足背动脉峰速度约43cm/s。_x000D_ 两侧股总静脉、股浅静脉、腘静脉、胫后静脉未见扩张，以上血管内膜面平整, 血流通畅。两侧小腿后侧肌群内未见明显异常回声。			23.2	1、“左侧”卵巢卵泡膜纤维瘤。_x000D_ 2、子宫平滑肌瘤。_x000D_ 3、增生期宫内膜。_x000D_ 4、宫颈慢性炎。_x000D_ 5、双侧输卵管未见特异。		0.8	5.85	3.18	0.5	2.13	1	0	120	321	0	9.2	1
330326-1000072245	1528003	施*姿	2018-10-30 15:53:00						子宫+双侧输卵管标本：_x000D_ _x000D_ 1、子宫多发平滑肌瘤。_x000D_ 2、宫颈慢性炎伴纳氏囊肿形成。_x000D_ 3、增生期宫内膜。_x000D_ 4、双侧输卵管未见特异。_x000D_ _x000D_							1528003	全子宫+双侧输卵管	50	3	0	1	3	4	0	发现盆腔包块10余天	2	1	158	80	32.0461	两侧甲状腺结节 _x000D_ 左侧叶上极结节 TI-RADS Ⅳa类_x000D_ 余结节 TI-RADS Ⅲ类_x000D_ 两侧乳腺未见明显异常发现	两侧甲状腺大小正常, 内部回声纤细, 分布均匀。左侧叶上极见一大小约1.8×2.8×2.3mm的低回声结节，纵横比＞1，边界欠清，未见明显包膜回声，内部回声欠均匀。左侧叶中、下极各见一低回声结节，大的约4×3×4mm，右侧叶内见数个低回声结节，大的约4×2×4mm，边界均清，内部回声欠均匀。_x000D_ 两侧乳房乳腺组织未见明显增厚，腺体排列较规则，未见明显团块回声，乳腺导管未见明显扩张。	2.3	1.5	9.7	子宫+双侧输卵管标本：_x000D_ _x000D_ 1、子宫多发平滑肌瘤。_x000D_ 2、宫颈慢性炎伴纳氏囊肿形成。_x000D_ 3、增生期宫内膜。_x000D_ 4、双侧输卵管未见特异。_x000D_ _x000D_	2.1	2.2	5.17	2.66	0.4	2.05	1	0	116	270	0	10.1	1
	1316989	蘧宝珠														1316989		45	1	0	1	1	2	0	体检发现盆腔包块7年余，经量增多2月	1	腹腔镜辅助经阴道全子宫切除术[LAVH手术];腹腔镜下双侧输卵管切除术 2次手术腹腔镜下双侧卵巢切除术;腹腔镜下盆腔淋巴结根治性切除术	55	160	21.4844			1.83	1.6	10.8		18.4		5.06	2.91	0.4	1.71	0	0	83	298	0	10.5	1
0075056748	1452217	夏*月	2018-02-05 17:49:00						子宫平滑肌瘤							1452217	肌瘤	47	1	0	0	1	1	0	发现盆腔包块7天	2	2	160	61	23.8281	两侧下肢深静脉无明显异常发现	急诊超声检查：_x000D_ 两侧股总静脉、股浅静脉、腘静脉、胫后静脉及小腿肌间静脉丛未见明显扩张，以上血管内膜面平整, 血流通畅。	3.11	2.2	8.7	BRAF基因编码丝/苏氨酸特异性激酶，是RAS/RAF/MEK/ERK/MAPK信号通路最为关键的激活因子，参与调控细胞内多种生物学事件，如细胞生长、分化和凋亡等。在多种人类恶性肿瘤中，如恶性黑色素瘤、结直肠癌、 肺癌、甲状腺癌、肝癌及胰腺癌等均存在不同比例的 BRAF 突变。exon15 上的激活区中第 1799 核苷酸易突变，T 突变为 A(T1799A)，导致其编码的谷氨酸由缬氨酸取代(V600E)。_x000D_ _x000D_ 请关注相关靶向药物；与乳头状甲状腺癌等疾病的预后相关。_x000D_ _x000D_ 备注：待检样本中应至少含有30%的肿瘤病变组织。本次检测未包含全部人类BRAF基因突变类型，不能排除被检测者带有此次检测外的其他基因突变类型。 检测项目:BRAF;标本类型:1.石蜡标本;检测方法:ARMS法;肿瘤细胞比例:90;检查结果:BRAF-V600E:阳性	8.3	0.4	9.52	5.93	0.56	2.94	1	0	140	233	0	10.6	1
	1266879	单爱芬														1266879		49	1	0	0	1	1	1	发现盆腔包块3年	2	宫腔镜下子宫病损切除术2次行全子宫切除术;双侧输卵管-卵巢切除术;淋巴结活组织检查	65	162	24.7676			2.29	0.8	17.4		4.2		8.08	4.33	0.6	2.62	1	0	147	345	0	10.8	1
0004003660	1693527	黄*晴	2020-06-04 10:00:00						补充报告：_x000D_ _x000D_ “子宫”梭形细胞肿瘤，结合形态及免疫组化符合富细胞型平滑肌瘤，建议随访。 BcL-2(++ ) CD10( - ) CD34( 血管+ ) Desmin( ++++ ) ER-α( 散在+ ) HE( 已切 ) Ki67( 2%+ ) S-100( - ) SMA( ++++ )							1693527	肌瘤	37	2	0	0	2	2	0	发现盆腔包块伴增大5年，经量增多1年	1	2	162	48	18.2899	双下肢深静脉及小腿后侧肌群无明显异常发现_x000D_	两侧股总静脉、股浅静脉、腘静脉及胫后静脉未见扩张，以上血管内膜面平整, 管腔内未探及异常回声，探头加压管腔可压闭，CDFI示血流通畅。_x000D_ 两侧小腿后侧肌群肌纹理清晰，未见明显异常团块回声，肌间静脉丛未见扩张。	2.5	0.9	20.1	补充报告：_x000D_ _x000D_ “子宫”梭形细胞肿瘤，结合形态及免疫组化符合富细胞型平滑肌瘤，建议随访。 BcL-2(++ ) CD10( - ) CD34( 血管+ ) Desmin( ++++ ) ER-α( 散在+ ) HE( 已切 ) Ki67( 2%+ ) S-100( - ) SMA( ++++ )	7	0.9	5.71	3.41	0.34	1.73	0	0	123	185	0	10.8	1
330382-0080059729	1599429	杨*	2019-06-13 18:32:00						1.“子宫”平滑肌瘤。_x000D_ _x000D_ 2.“双侧输卵管系膜囊肿”符合输卵管系膜副中肾管囊肿。							1599429	肌瘤	39	3	0	0	3	3	0	月经经期延迟11月，经量增多4月	1	2	163	55	20.7008	两侧乳腺囊肿 BI-RADS 2类_x000D_ 两侧甲状腺无明显异常发现_x000D_ _x000D_	两侧甲状腺大小正常, 包膜清晰、光滑，内部回声纤细, 分布均匀, 未见明显团块回声。_x000D_ 两侧乳房回声欠均匀，腺体排列欠规则，乳腺导管未见明显扩张。左侧乳头外侧见一6×4mm的囊性暗区，右侧乳头外下方见一大小约4×3mm的囊性暗区。 _x000D_ _x000D_	1.81	1.4	16.8	1.“子宫”平滑肌瘤。_x000D_ _x000D_ 2.“双侧输卵管系膜囊肿”符合输卵管系膜副中肾管囊肿。	<0.8	0.8	5.25	3.24	0.28	1.64	0	0	134	185	0	11.1	1
	1673660	庄建艳														1673660		57	1	0	1	1	2	1	绝经后阴道出血1月	1	双侧输卵管-卵巢切除术;全子宫切除术;大网膜切除术;肠粘连松解术;阑尾切除术;诊断性刮宫术;盆腔淋巴结清扫术	46	161	17.7462			2.02	0.6	15.9		11.1		7.21	4.53	0.48	2.14	1	0	122	237	0	10.3	1
00011410373157	1508013	韩*	2018-08-21 11:14:00						“子宫”平滑肌肿瘤（富细胞性）。							1508013	肌瘤	48	2	0	0	2	2	0	月经量增多1年余	2	2	159	44	17.4044	肝胆脾胰肾输尿管及膀胱无明显异常发现	肝脏大小正常, 肝表面平整，肝缘锐利，内部回声纤细, 均匀, 血管网络清晰，门静脉主干内径正常。胆囊大小正常, 囊壁薄, 囊内未见异常回声。胆总管及肝内胆管无扩张。脾脏无肿大。胰腺大小及内部回声未见明显异常。_x000D_ 两肾大小及内部回声正常。两侧输尿管无扩张。膀胱充盈差，内未见明显异常回声。	4.76	1.1	19.0	“子宫”平滑肌肿瘤（富细胞性）。	7.9	0.7	4.8	3.08	0.43	1.23	0	0	98	139	0	9.7	1
0070280219	1467582	林*妹	2018-04-16 12:19:00						子宫+双输卵管标本：_x000D_ 1、子宫平滑肌瘤。_x000D_ 2、“宫颈”粘膜慢性炎。_x000D_ 3、老年性萎缩性宫内膜。_x000D_ 4、“双侧输卵管”未见特异。_x000D_							1467582	全子宫+双侧输卵管	57	2	0	1	2	3	1	发现盆腔包块10年，绝经后阴道出血20余天	1	1	155	69	28.7201			2.9	1.2	7.7	子宫+双输卵管标本：_x000D_ 1、子宫平滑肌瘤。_x000D_ 2、“宫颈”粘膜慢性炎。_x000D_ 3、老年性萎缩性宫内膜。_x000D_ 4、“双侧输卵管”未见特异。_x000D_	8.8	0.5	6.08	3.83	0.31	1.87	1	0	131	248	0	10.9	1
	1566245	朱秀珍														1566245		44	2	0	1	2	3	0	月经经量增多，经期延长伴头晕3月	1	腹腔镜辅助经阴道全子宫切除术[LAVH手术];腹腔镜下双侧输卵管切除术	60	155	24.974			2.1	0.9	20		2.1	0.4	4.48	2.34	0.36	1.64	0	0	73	379	0
330327-1001081640	1552998	林*燕	2019-01-16 12:35:00						子宫+双侧输卵管切除标本：_x000D_ 1、子宫多发性平滑肌瘤。_x000D_ 2、宫颈慢性炎。_x000D_ 3、增生期宫内膜。_x000D_ 4、双侧输卵管未见特异，一侧输卵管系膜副中肾管囊肿形成。							1552998	全子宫+双侧输卵管	48	2	0	0	2	2	0	发现盆腔包块3年，经量增多2年	1	1	150	56	24.8889	两侧甲状腺无明显异常发现	两侧甲状腺大小正常, 包膜清晰、光滑，内部回声纤细, 分布均匀, 左侧中上极见一大小约2×2mm的囊性暗区（小囊肿）。	1.64	0.6	27.9	子宫+双侧输卵管切除标本：_x000D_ 1、子宫多发性平滑肌瘤。_x000D_ 2、宫颈慢性炎。_x000D_ 3、增生期宫内膜。_x000D_ 4、双侧输卵管未见特异，一侧输卵管系膜副中肾管囊肿形成。	8.6	0.4	8.28	5.65	0.52	2.06	1	0	132	312	0	10.5	1
330327-1092296	1461322	郑*霞	2020-11-25 12:44:00						“子宫”平滑肌瘤。							1461322	肌瘤	49	1	0	3	1	4	0	发现盆腔包块8年余	2	2	164	65	24.1672	两侧下肢大动脉无明显异常发现_x000D_ 两侧下肢深静脉无明显异常发现_x000D_	两侧股总、股浅、腘、胫前及足背动脉内径均正常, 血管内-中膜未见明显增厚，内膜面平整, 管腔内血流均通畅。左侧足背动脉血流峰速度约52cm/s，右侧足背动脉血流峰速度约55cm/s。_x000D_ 两侧股总静脉、股浅静脉、腘静脉、胫后静脉及腓静脉未见扩张，以上血管内膜面平整, 管腔内未探及异常回声，探头加压管腔可压闭，CDFI示血流通畅。_x000D_ 两侧小腿肌间静脉丛未见扩张。	7.28	1.1	19.9	“子宫”平滑肌瘤。	6.2	0.7	7.54	5.22	0.49	1.79	0	0	132	230	0	11.9	1
0006036529	1659351	钟*华	2019-12-17 09:00:00						子宫+双侧输卵管标本：_x000D_ 1、子宫平滑肌瘤。_x000D_ 2、宫颈慢性炎。_x000D_ 3、增生期子宫内膜。_x000D_ 4、双侧输卵管未见明显特异。							1659351	全子宫+双侧输卵管	46	2	0	1	2	3	0	经量增多3月	1	1	158	51	20.4294	两侧下肢深静脉无明显异常发现	两侧股总静脉、股浅静脉、腘静脉、胫后静脉未见扩张，以上血管内膜面平整, 血流通畅。两侧小腿后侧肌群内未见明显异常回声。	2.08	0.4	15.3	子宫+双侧输卵管标本：_x000D_ 1、子宫平滑肌瘤。_x000D_ 2、宫颈慢性炎。_x000D_ 3、增生期子宫内膜。_x000D_ 4、双侧输卵管未见明显特异。	2.4	0.8	7.08	4.52	0.43	2.07	1	0	82	292	0	10.2	1
	503851	苏冬兰														503851		57	3	0	0	3	3	1	绝经后4年，阴道不规则出血20余天。	1	子宫全切除术+双附件切除术	55	156	22.6003									4.8	3	0.3	1.4	0	1	111	220	0	8.2	0
330382-0000071217	1714340	何*媚	2020-08-14 14:32:00						“子宫”平滑肌瘤。							1714340	肌瘤	46	0	0	0	0	0	0	经期延长2年	1	2	162	60	22.8624	两侧下肢深静脉及小腿后侧肌群无明显异常发现_x000D_	两侧股总静脉、股浅静脉、腘静脉、胫后静脉及腓静脉未见扩张，以上血管内膜面平整, 管腔内未探及异常回声，探头加压管腔可压闭，CDFI示血流通畅。_x000D_ 两侧小腿后侧肌群肌纹理清晰，未见明显异常团块回声，肌间静脉丛未见扩张，管腔内未探及异常回声，探头加压管腔可压闭，CDFI示血流充盈良好。		0.6	21.4	“子宫”平滑肌瘤。	11.0	0.7	6.46	3.65	0.4	2.29	1	0	101	446	1	9.0	0
430923198912252922	1752423	黄*英	2020-12-28 13:03:00						“子宫肌瘤”平滑肌瘤。							1752423	肌瘤	30	2	0	3	2	5	0	发现盆腔包块伴增大3年	2	2	156	60	24.6548	两侧下肢大动脉无明显异常发现_x000D_ 两侧下肢深静脉无明显异常发现_x000D_	两侧股总、股浅、腘、胫前及足背动脉内径均正常, 血管内-中膜未见明显增厚，内膜面平整, 管腔内血流均通畅。_x000D_ 两侧股总静脉、股浅静脉、腘静脉、胫后静脉及腓静脉未见扩张，以上血管内膜面平整, 管腔内未探及异常回声，探头加压管腔可压闭，CDFI示血流通畅。_x000D_ 两侧小腿肌间静脉丛未见扩张，管腔内未探及异常回声，探头加压管腔可压闭，CDFI示血流充盈良好。	2.08	0.7	29.7	“子宫肌瘤”平滑肌瘤。	11.4	1	5.27	3.71	0.19	1.31	0	1	141	243	0	10.2	1
	1358541	鲍雪梅														1358541		61	3	0	2	3	5	1	反复大便难解、次数增多伴双下肢疼痛5月余	3	全子宫切除术;双侧输卵管-卵巢切除术;大网膜切除术;肠系膜病损切除术;	54.5	147	25.221			4.22	2.7	50.6		33.1		6.88	3.78	0.5	2.36	1	0	124	357	0	10	1
330324-1000513914	1588614	陈*燕	2019-05-30 11:08:00						1、“子宫”平滑肌瘤。_x000D_ _x000D_ 2、“右”输卵管系膜副中肾管囊肿。							1588614	肌瘤	39	2	0	3	2	5	0	发现盆腔包块2月	2	2	166	71	25.7657	超声造影提示：右肝后叶局灶性脂肪浸润	右肝后叶下段见一12×7mm的高回声结节, 边界清，内部回声欠均匀。_x000D_ Sonovue超声造影：_x000D_ 经肘静脉团注Sonovue造影剂混悬液2.4ml并尾随5ml生理盐水冲管后，该结节与周围肝实质同步增强与消退。	2.91	0.7	129.6	1、“子宫”平滑肌瘤。_x000D_ _x000D_ 2、“右”输卵管系膜副中肾管囊肿。	5.1	0.6	6.7	4.22	0.41	1.91	1	0	105	320	0	9.7	1
0001107609	1731475	周*月	2020-10-16 15:45:00						初步报告：_x000D_ _x000D_ 子宫平滑肌瘤，生长活跃，平滑肌肉瘤待排，待免疫组化检测。_x000D_ _x000D_ 补充报告：_x000D_ _x000D_ ”子宫“平滑肌瘤伴生长活跃，符合子宫富细胞型平滑肌瘤，请结合临床随诊。_x000D_ Desmin( + ) HE( 已切 ) Ki67( 4%+ ) SMA( + )							1731475	肌瘤	51	2	0	0	2	2	0	发现盆腔包块逐渐增大18年，经量增多7月	1	2	156	60	24.6548	子宫底部异常团块 肌瘤伴变性首先考虑	经阴道探查：子宫增大，宫体后位，底部宫壁见一大小约98×84×99mm的低回声团块，边界尚清，部分突向宫腔，内部回声不均匀，内可见数处不规则液性暗区及强回声团，内膜薄。两侧卵巢大小及内部回声正常。	1.48	1.3	11	初步报告：_x000D_ _x000D_ 子宫平滑肌瘤，生长活跃，平滑肌肉瘤待排，待免疫组化检测。_x000D_ _x000D_ 补充报告：_x000D_ _x000D_ ”子宫“平滑肌瘤伴生长活跃，符合子宫富细胞型平滑肌瘤，请结合临床随诊。_x000D_ Desmin( + ) HE( 已切 ) Ki67( 4%+ ) SMA( + )	9.4	0.5	4.38	2.77	0.27	1.3	0	1	98	291	0	10	1
	1787321	孔赛珠														1787321		53	1	0	2	1	3	1	体检发现盆腔包块20余年	2	腔镜下全子宫切除术;腹腔镜下双侧输卵管-卵巢切除术	54	157	21.9076			2.67	0.4	20.4		7.6	0.8	6.92	3.41	0.53	2.58	1	0	130	320	0	9.6	1
330326-1000370205	1524802	陈*女	2018-10-10 16:45:00						子宫+”左“侧输卵管标本：_x000D_ _x000D_ 1、子宫多发性平滑肌瘤。_x000D_ _x000D_ 2、宫颈慢性炎。_x000D_ _x000D_ 3、增生期宫内膜。_x000D_ _x000D_ 4、“左”侧输卵管未见特异。							1524802	全子宫+双侧输卵管	48	1	0	4	1	5	0	发现盆腔包块伴增大3年	2	1	159	59	23.3377	肝胆脾胰肾输尿管及膀胱无明显异常发现	肝脏大小正常, 肝表面平整，肝缘锐利，内部回声纤细, 均匀, 血管网络清晰，门静脉主干内径正常。胆囊大小正常, 囊壁薄, 囊内未见明显异常回声。胆总管及肝内胆管无扩张。脾脏无肿大。胰腺头、体部未见明显异常回声，尾部因胃肠气体遮盖显示不清。_x000D_ 两肾大小及内部回声正常。两侧输尿管无扩张。膀胱充盈可，内未见明显异常回声。_x000D_	2.16	1.4	22.9	子宫+”左“侧输卵管标本：_x000D_ _x000D_ 1、子宫多发性平滑肌瘤。_x000D_ _x000D_ 2、宫颈慢性炎。_x000D_ _x000D_ 3、增生期宫内膜。_x000D_ _x000D_ 4、“左”侧输卵管未见特异。	16.5	0.4	12.56	7.91	0.96	3.6	1	0	151	365	0	9.8	1
330326-671506	1509646	周*霞	2018-11-07 12:29:00						_x000D_ “子宫肌瘤”平滑肌瘤（多个小肌瘤）。							1509646	肌瘤	39	1	0	3	1	4	0	反复下腹痛6月余	3	2	165	58	21.3039	尿潴留_x000D_ _x000D_ （注：急诊超声检查提供信息有限，请酌情参考。）	急诊超声检查：_x000D_ 两肾大小及内部回声正常。两侧输尿管无扩张。膀胱内未见明显异常回声。_x000D_ 排尿后膀胱大小约82×33×35mm，容量约49ml。	2.49	2.3	19.1	_x000D_ “子宫肌瘤”平滑肌瘤（多个小肌瘤）。	14.6	0.6	8.25	5.25	0.75	2.17	1	0	131	231	0	10.1	1
	1167323	吴文影														1167323		40	1	0	2	1	3	0	发现盆腔肿物18年	2	全子宫切除术;	55	169	19.257			2.27	1.4	16.7		3.5	0.8	3.64	1.55	0.29	1.44	0	1	61	426	1	10.8	1
3303030802040902	1591858	金*莲	2019-05-21 08:55:00						1、“子宫”平滑肌瘤。_x000D_ _x000D_ 2、“双侧”输卵管积水。_x000D_ _x000D_ 3、“右侧卵巢”滤泡囊肿。							1591858	肌瘤	44	2	0	0	2	2	0	发现盆腔包块4年，经量增多1月	1	2	150	42	18.6667	肝胆脾胰肾输尿管及膀胱无明显异常发现	肝脏大小正常, 肝表面平整，内部回声纤细, 均匀, 血管网络清晰，门静脉主干内径正常。餐后胆囊偏小, 囊内未见明显异常回声。胆总管及肝内胆管无扩张。脾脏无肿大。胰腺头、体部未见明显异常回声，尾部因胃肠气体遮盖显示不清。_x000D_ 两肾大小及内部回声正常。两侧输尿管无扩张。膀胱充盈可，内未见明显异常回声。	2	0.6	8.6		3.2	0.8	5.46	3.68	0.41	1.32	0	0	103	344	0	11.1	1
0000387721	1624025	王*业	2019-08-22 15:39:00						1.子宫内膜息肉；内膜腺体符合增生期图像。_x000D_ _x000D_ 2.“子宫”平滑肌瘤伴灶区梗死。							1624025	肌瘤	44	1	0	2	1	3	0	发现盆腔包块10年，经量多伴经期延长4年	1	2	155	58	24.1415	两侧下肢深静脉无明显异常发现	两侧股总静脉、股浅静脉、腘静脉、胫后静脉及小腿肌间静脉丛未见扩张，以上血管内膜面平整, 血流通畅。	2.89	1.5	7.4	1.子宫内膜息肉；内膜腺体符合增生期图像。_x000D_ _x000D_ 2.“子宫”平滑肌瘤伴灶区梗死。	12.6	0.6	6.23	3.85	0.38	1.90	1	0	97	347	0	10.7	1
	645999	黄彩莲														645999		51	2	0	0	2	2	0	体检发现盆腔包块7年余，阴道不规则流血3月	1	腹腔镜辅助下阴式子宫切除术+左侧卵巢囊肿剥除术	70	161	27.0051			2.7	1.8	11.6		2		8.67	5.73	0.46	2.32	1	0	144	276	0	10.1	1
	1228717	陈彩华														1228717		57	4	0	0	4	4	1	体检发现盆腔包块8年，发现增大1月余	2	腹腔镜辅助经阴道全子宫切除术[LAVH手术];腹腔镜下双侧输卵管-卵巢切除术;	53	160	20.7031			1.7	4.4	13.9		17.6		5.85	2.87	0.48	2.43	1	0	129	231	0	10	1
	1739766	易小霞														1739766		56	2	0	0	2	2	1	发现盆腔包块1年余，绝经后阴道不规则流血3月余。	1	经阴道单孔腹腔镜手术;腹腔镜下全子宫切除术;腹腔镜下双侧输卵管-卵巢切除术;诊断性刮宫术	61	155	25.3902			3.32	3.8	24.7		34.7	0.8	6.19	3.22	0.46	2.33	1	0	138	377	0	9.9	1
00011412172902	1725432	林*虾	2020-09-21 19:30:22						1、“子宫”平滑肌瘤。_x000D_ _x000D_ 2、“左输卵管”系膜副中肾管囊肿。							1725432	肌瘤	39	1	0	4	1	5	0	经期延长半年，经量增多1月余	1	2	158	60	24.0346	子宫肌瘤（肌壁间、浆膜下）_x000D_ _x000D_ （肌瘤之间由于声衰减或者位置关系存在遮挡可能，超声所示肌瘤个数及位置仅供临床医生参考）	经阴道探查：子宫增大，宫体前位，左前壁见一大小约43×36×46mm的低回声团块，部分向宫外突出，边界清，内部回声不均匀，其旁另见一大小约24×18×25mm的低回声结节，内缘略挤压宫腔，外缘距浆膜层9.4mm，边界清，内部回声欠均匀；子宫后壁近宫颈紧贴浆膜层见一大小约13×12×10mm的低回声结节，边界清，内部回声欠均匀。内膜厚18mm（双层），内部回声分布欠均匀。两侧卵巢大小及内部回声正常。	4.28	0.86	8.5	1、“子宫”平滑肌瘤。_x000D_ _x000D_ 2、“左输卵管”系膜副中肾管囊肿。	5.500	0.8	7.62	4.78	0.3	2.44	1	0	140	223	0	10.9	1
330381-0001632153	1553648	池*彩	2019-01-14 10:15:00						1、子宫粘膜下平滑肌瘤，子宫内膜息肉样增生。_x000D_ 2、子宫平滑肌瘤。							1553648	肌瘤	42	1	0	1	1	2	0	发现盆腔包块15年	2	2	158	51	20.4294	左侧小腿肌间静脉丛曲张	两侧股总静脉、股浅静脉、腘静脉、胫后静脉及右侧小腿肌间静脉丛未见扩张，以上血管内膜面平整, 血流通畅。_x000D_ 左侧小腿肌间静脉见一条管腔回声，最宽处内径约7mm，管腔内血流通畅。_x000D_ _x000D_	1.79	2.4	25.2	1、子宫粘膜下平滑肌瘤，子宫内膜息肉样增生。_x000D_ 2、子宫平滑肌瘤。	<0.8	0.5	5.73	3.88	0.39	1.44	0	1	125	252	0	10.7	1
	1230258	黄秋月														1230258		49	2	0	2	2	4	0	体检发现盆腔包块5年余，月经改变7月。	1	腹腔镜辅助经阴道全子宫切除术[LAVH手术];腹腔镜下双侧输卵管切除术;2冰冻后腹腔镜下双侧卵巢切除术;腹腔镜下盆腔淋巴结根治性切除术	46	153	19.6506			2.76	1.4	11		0.8		5.97	4.14	0.29	1.51	0	1	74	319	0	10	1
0004461512	1588498	项*红	2019-05-08 11:32:00						1、“子宫”平滑肌瘤。_x000D_ _x000D_ 2、符合子宫内膜息肉，腺体普通型增生（简单型增生过长）。							1588498	肌瘤	44	2	0	0	2	2	0	发现盆腔包块1月余	2	2	163	56	21.0772	子宫肌瘤_x000D_ 子宫内膜回声改变 息肉？_x000D_ 右侧卵巢小囊肿	经阴道探查：子宫增大，宫体后位，子宫后壁见一大小约56×41×63mm的低回声团块，边界清，内部回声不均匀，内膜厚8mm（双层），内部回声分布不均匀，局部回声偏强呈结节状，大的范围约15×6×11mm。右侧卵巢大小尚正常，内见二个囊性暗区，大的约17×9×mm，囊内见较多细点样回声。左侧卵巢大小及内部回声正常。	3.15	0.5	26.2	1、“子宫”平滑肌瘤。_x000D_ _x000D_ 2、符合子宫内膜息肉，腺体普通型增生（简单型增生过长）。	1.2	0.7	6.21	3.36	0.34	2.42	1	0	118	254	0	11.1	1
0075090101	1485150	郑*微	2018-05-23 10:46:00						1、“子宫”平滑肌瘤。_x000D_ _x000D_ 2、送检子宫内膜呈普通型增生图像，另见宫颈管组织伴鳞化。_x000D_ _x000D_ 3、“左侧输卵管”系膜副中肾管囊肿。							1485150	肌瘤	42	1	0	3	1	4	0	发现盆腔包块7年，经量增多半年	1	2	157	46	18.662	胆囊胆固醇性息肉	肝脏大小正常，内部回声稍偏粗、分布均匀，血管网络清晰，门静脉主干内径正常。胆囊大小正常，囊壁偏厚，囊内见一颗长径约4MM的高回声团，附壁，无明显声影，胆总管及肝内胆管无扩张。脾脏无肿大。胰腺头、体部未见明显异常回声，尾部因胃肠气体遮盖显示不清。_x000D_ 两肾大小及内部回声正常。两侧输尿管无扩张。膀胱充盈差，内未见明显异常回声。_x000D_	2.07	0.7	67.7	1、“子宫”平滑肌瘤。 2、送检子宫内膜呈普通型增生图像，另见宫颈管组织伴鳞化。 3、“左侧输卵管”系膜副中肾管囊肿。	11.2	0.6	4.27	2.2	0.24	1.69	0	0	106	243	0	11.3	1
		金翠兰						破碎肌瘤样组织，符合平滑肌源性肿瘤伴大片坏死，细胞轻度异性增生，平滑肌肉瘤可能性大，待石蜡及免疫组化确定	1.结合免疫组化结果，符合平滑肌肉瘤2.宫颈慢性炎，宫颈息肉3.老年萎缩性宫内膜4.两侧输卵管间皮囊肿，两侧卵巢未见异常	宫壁见一瘤样组织，质偏软偏脆，色灰白，宫内膜光滑平整，宫颈轻糜，双侧输卵管及卵巢外观无殊。	Caldesmon( + ) CD10( - ) Desmin( + ) FH(+ ) HE( 已切) Ki67( 约60-70%+ ) Myod1（-）P16（-） P53（+） PHH3(散在+) SMA(+) VIM(+) ER-a(-) HE(已切) PR(- )	60-70	0	0	0	0002016724	子宫+双附件	61	3	0	1	3	4	1	发现盆腔包块2年	2	腹腔镜下子宫全切+双侧附件切除	66.5	156	27.3258	子宫壁异常团块 肌瘤考虑（富细胞型）	子宫增大，宫体前位，宫体壁内见一大小约80*59*65mm的低回声团块，边界尚清，形态不规则，呈粗分叶状，局部回声增强，可谈及丰富的血流信号，宫腔结构因团块关系显示不清。宫壁团块于10秒开始增强，未见明显粗大血管显示，23秒增强达峰，呈均匀等增强，消退期团块内部早起快速消退，周围肌层可见环形增强	1.91	0.7	7.3		3	0.9	4.62	3.17	0.2	1.07	0	2	138	242	0	9.8	1
	674946	李冬梅														674946		44	2	0	0	2	2	0	月经经量增多1年	1	全子宫切除术;双侧输卵管切除术;(左)卵巢囊肿剥除术2次行双侧卵巢切除术	67	160	26.1719			1.39	1.6	40.3		12		6.3	4.15	0.26	1.4	0	1	99	291	0	9.8	1
	1485879	柳丽丽														1485879		44	2	0	4	2	6	0	粘膜下肌瘤术后10月余，发现宫腔异常回声半月	2	腹腔镜辅助经阴道全子宫切除术[LAVH手术];腹腔镜下双侧输卵管切除术，2冰冻后切除卵巢	62.5	163	23.5237			1.59	0.7	13.2		7.1	0.6	4.96	3.3	0.25	1.35	0	1	121	185	0	9.1	0
330327-1000347564	1499313	吴*蓉	2018-07-16 09:00:00						1.“子宫”平滑肌瘤。_x000D_ 2.子宫内膜息肉。							1499313	肌瘤	38	1	0	1	1	2	0	经量增多2年，自觉腹围增大3月余	2	2	156	57	23.4221	肝胆脾胰肾输尿管及膀胱无明显异常发现	肝脏大小正常, 内部回声纤细, 均匀, 血管网络清晰，门静脉主干内径正常。胆囊大小正常, 囊壁薄, 囊内未见异常回声。胆总管及肝内胆管无扩张。脾脏无肿大。胰腺头、体部未见明显异常回声，尾部因胃肠气体遮盖显示不清。_x000D_ 两肾大小及内部回声正常。两侧输尿管无扩张。膀胱内未见明显异常回声。	2.26	0.6	38.9	1.“子宫”平滑肌瘤。_x000D_ 2.子宫内膜息肉。	4.6	0.5	6.17	3.36	0.47	2.28	1	0	91	379	0	8.6	0
0090099087	1424176	吴*兰	2018-09-20 20:01:00						子宫+双附件切除标本：_x000D_ 1、子宫多发性平滑肌瘤。_x000D_ 2、宫颈、宫颈管慢性炎。_x000D_ 3、一侧卵巢表面可见脂肪坏死结节，另一侧卵巢未见特异，双侧输卵管系膜副中肾管囊肿。_x000D_							1424176	全子宫+双侧附件	51	1	0	2	1	3	1	发现盆腔包块2年	2	1	168	79	27.9904	两侧小腿肌间静脉曲张_x000D_	两侧股总静脉、股浅静脉、腘静脉、胫后静脉未见扩张，以上血管内膜面平整, 血流通畅。_x000D_ 两侧小腿肌间静脉丛均见数条管腔扩张，最宽处内径左侧约9mm，右侧约10mm，管腔内血流通畅。_x000D_	2.9	1.6	24.2	子宫+双附件切除标本：_x000D_ 1、子宫多发性平滑肌瘤。_x000D_ 2、宫颈、宫颈管慢性炎。_x000D_ 3、一侧卵巢表面可见脂肪坏死结节，另一侧卵巢未见特异，双侧输卵管系膜副中肾管囊肿。_x000D_	＜2		4.83	2.59	0.31	1.81	0	0	137	198	0	10.9	1
	1702572	李燕芬														1702572		52	2	0	2	2	4	0	发现盆腔包块6年，月经改变4年余4年余前出现经量增	1	腹腔镜下全子宫切除术;腹腔镜下双侧输卵管切除术;(左)腹腔镜卵巢病损切除术; 2次手术腹腔镜下双侧卵巢切除术;(双侧)腹腔镜下卵巢动静脉高位结扎术;盆腔粘连松解术	56	161	21.6041			2.93	0.6	19		0.8	0.6	4.28	2.04	0.33	1.81	0	0	115	220	0
	1824440	曾晓菲														1824440		30	2	0	0	2	2	0	发现盆腔包块15天	2	腹腔镜下盆腔病损切除术;(右)腹腔镜下输卵管系膜囊肿剔除术;	46.5	163	17.5016			2.8	0.7	16.6		22.5	0.4	6.12	3.76	0.35	1.97	1	0	122	346	0	8.7	0
00011411682087	1569507	余*珍	2019-03-06 14:19:00						“子宫”平滑肌瘤，局部区富于细胞性。							1569507	肌瘤	47	4	0	1	1	5	0	发现盆腔包块1月余	2	2	158	54	21.6311	两侧下肢深静脉无明显异常发现	两侧股总静脉、股浅静脉、腘静脉、胫后静脉及小腿肌间静脉丛未见扩张，以上血管内膜面平整, 血流通畅。	1.87	2.7	10.0	“子宫”平滑肌瘤，局部区富于细胞性。	<0.8	0.6	8.75	5.55	0.41	2.71	1	0	126	272	0	10.3	1
330327-1000883977	1671169	陈*妹	2020-03-19 08:59:00						01.“宫颈管”宫颈管息肉。_x000D_ 02.“子宫内膜息肉？”镜下见腺体呈增生期图像，部分呈不规则增生。_x000D_ _x000D_							1671169	全子宫+双侧输卵管	52	1	0	0	1	1	0	发现盆腔包块13年	2	1	154	57	24.0344	两侧下肢深静脉无明显异常发现_x000D_ _x000D_ （注：床旁超声检查提供信息有限，请酌情参考）	急诊床旁超声检查：_x000D_ 两侧股总静脉、股浅静脉、腘静脉、胫后静脉未见扩张，以上血管内膜面平整, 血流通畅。_x000D_ 两侧小腿后侧肌群未见明显异常回声。_x000D_	1.69	2	12.9	01.“宫颈管”宫颈管息肉。_x000D_ 02.“子宫内膜息肉？”镜下见腺体呈增生期图像，部分呈不规则增生。_x000D_ _x000D_	5.5	0.5	4.62	2.15	0.47	1.95	1	0	82	294	0	11.1	1
	1722049	郑银女														1722049		44	2	0	2	2	4	0	发现盆腔包块10年，经量增多伴下腹痛20天	1	腹腔镜下子宫平滑肌瘤剔除术;子宫整形术2次外院经腹全子宫切除术+双侧输卵管卵巢切除术+大网膜切除术+腹膜活组织检查+输尿管狭窄松解术（双侧）+膀胱修补术+肠粘连松解术+直肠修补术	69	162	26.2917			1.86	0.9			3.4		8.12	4.73	0.46	2.81	1	0	134	353	0	9.9	1
00011301236218	1373164	陈*桂	2017-04-05 12:09:00						“子宫”平滑肌瘤。							1373164	肌瘤	42	2	0	0	2	2	0	下腹扪及包块2年，伴逐渐增大	2	2	147	49	22.6757	肝囊肿_x000D_ 胆囊壁增厚_x000D_ 胆囊息肉	急诊超声检查：_x000D_ 肝脏大小正常, 内部回声纤细, 均匀, 血管网络清晰，门静脉主干内径正常。右肝内见数个囊性暗区，大的约12×11MM。胆囊大小正常, 囊壁增厚，最厚处约6MM，囊内见一颗米粒大小的中等回声光点，附壁，无声影。胆总管及肝内胆管无扩张。脾脏无肿大。胰腺头、体部未见明显异常回声，尾部因胃肠气体遮盖显示不清。两肾大小及内部回声正常。_x000D_	5.21	0.6	15.0	“子宫”平滑肌瘤。	8.0		8.34	3.36	0.79	3.57	1	0	119	277	0	11.3	1
	1474539	胡仙莲														1474539		57	3	0	2	2	5	1	发现盆腔包块伴增大10余年，反复下腹痛2年。	3	腹腔镜探查;肠粘连松解术;盆腔病损切除术;全子宫切除术;双侧输卵管-卵巢切除术;(双侧)卵巢动静脉高位结扎术;大网膜切除术;	58	148	26.4792			2.5	2.1	30.9		4.9	0.7	5.28	3.28	0.27	1.67	0	0	127	280	0	9.8	1
00019500275558	1537716	张*姿	2018-11-21 14:51:00						子宫+双附件标本：_x000D_ 1、多发性子宫平滑肌瘤。_x000D_ _x000D_ 2、增生期宫内膜。_x000D_ _x000D_ 3、宫颈慢性炎。_x000D_ _x000D_ 4、双侧附件镜下未见特异。							1537716	全子宫+双侧附件	55	1	0	1	1	2	1	发现盆腔包块20余年	2	1	156	68	27.9421	两侧下肢深静脉无明显异常发现	两侧股总静脉、股浅静脉、腘静脉、胫后静脉及小腿肌间静脉丛未见扩张，以上血管内膜面平整, 血流通畅。	1.43	11.4	10.8	子宫+双附件标本：_x000D_ 1、多发性子宫平滑肌瘤。_x000D_ _x000D_ 2、增生期宫内膜。_x000D_ _x000D_ 3、宫颈慢性炎。_x000D_ _x000D_ 4、双侧附件镜下未见特异。	7.2	0.4	7.45	4.4	0.42	2.6	1	0	146	268	0	11.0	1
	1326127	金聪微														1326127		48	1	0	1	1	2	0	体检发现盆腔包块5月余，增大15天	2	腹腔镜下子宫平滑肌瘤剔除术;(左)腹腔镜下输卵管系膜囊肿剔除术;腹腔镜下子宫病损电凝术;2次中心医院子宫+双附件+盆腔淋巴结	63.5	160	24.8047			2.13	1.2	18.3		5		8.06	4.75	0.42	2.65	1	0	125	236	0	12.8	1
00011411925454	1690355	彭*平	2020-05-21 14:05:00						_x000D_ “子宫”平滑肌瘤伴间质玻璃样变，灶区红色变性。							1690355	肌瘤	34	0	0	0	0	0	0	扪及下腹部包块14天	2	2	158	70	28.0404	左侧下肢大动脉无明显异常发现_x000D_ 左侧下肢深静脉及小腿后侧肌群无明显异常发现_x000D_	左侧股总、股浅、腘、胫前及足背动脉内径均正常, 血管内-中膜未见明显增厚，内膜面平整, 管腔内血流均通畅。左侧足背动脉血流峰速度约32cm/s。_x000D_ 左侧股总静脉、股浅静脉、腘静脉、胫后静脉及腓静脉未见扩张，以上血管内膜面平整, 管腔内未探及异常回声，探头加压管腔可压闭，CDFI示血流通畅。_x000D_ 左侧小腿后侧肌群肌纹理清晰，未见明显异常团块回声，肌间静脉丛未见扩张，管腔内未探及异常回声，探头加压管腔可压闭，CDFI示血流充盈良好。	3.57	1	17.2	_x000D_ “子宫”平滑肌瘤伴间质玻璃样变，灶区红色变性。	8.4		5.97	3.37	0.46	2.07	1	0	127	275	0	10.2	1
	1482437	罗盛英														1482437		52	2	0	1	2	3	0	下腹痛1月余，刮宫后阴道流血20天	3	腹腔镜辅助经阴道全子宫切除术[LAVH手术];腹腔镜下双侧输卵管-卵巢切除术	55	160	21.4844			2.18	2	11.8		5.4	0.5	4.62	1.88	0.35	2.24	1	0	128	285	0	9.6	1
	869888	陈玉菊														869888		36	1	0	3	1	4	0	体检发现盆腔包块12年，自觉腹部包块1月	2	腹腔镜下子宫平滑肌瘤剔除术;2冰冻后腹腔镜辅助经阴道全子宫切除术[LAVH手术];腹腔镜下双侧输卵管切除术	57	160	22.2656			1.89	1.5	17.8		4.1		4.72	2.78	0.25	1.61	0	0	113	326	0	11	1
	1258542	贾玉芬														1258542		52	2	0	2	2	4	1	体检发现盆腔包块10年，增大2年。	2	腹腔镜下全子宫切除术;(双侧)腹腔镜下双侧输卵管切除，2冰冻后卵巢切除术;腹腔镜下盆腔粘连松解术	54	160	21.0938			1.58	0.7	8.9		4.6	0.6	6.82	4.37	0.32	2.07	1	0	141	238	0	10.5	1
330329-1000646958	1571831	姚*媖	2020-04-03 12:46:00						1、“子宫”平滑肌瘤。_x000D_ _x000D_ 2、“左”输卵管系膜副中肾管囊肿。							1571831	肌瘤	26	0	0	2	0	2	0	经量增多伴经期延长8月余	2	2	158	45	18.026	双下肢深静脉无异常发现	两侧股总静脉、股浅静脉、腘静脉、胫后静脉未见扩张，以上血管内膜面光滑, 平整, 血流通畅。_x000D_ 两侧小腿后侧肌群内未见明显异常回声。	7.3	0.7	4.8	1、“子宫”平滑肌瘤。_x000D_ _x000D_ 2、“左”输卵管系膜副中肾管囊肿。	5.8	0.8	4.22	1.51	0.49	2.07	1	0	95	326	0	10.4	1
	898335	李陈英														898335		61	3	0	0	3	3	1	体检发现腹部包块1月余	2	腹直肌肿瘤剔除＋开腹右侧盆腔肿块剔除术＋全子宫＋双附件切除术	56	153	23.9224			2.2	1.2	9.6		6		5.6	3.8	0.2	1.3	0	1	129	214	0	9.2	1
330326-1000288811	1625208	周*凤	2019-08-27 08:58:00						子宫及双侧附件切除标本：_x000D_ _x000D_ 1.右侧卵巢良性Brenner氏瘤。_x000D_ _x000D_ 2.子宫肌壁间平滑肌瘤。_x000D_ _x000D_ 3.宫颈慢性炎。_x000D_ _x000D_ 4.左侧卵巢未见特异；双侧输卵管未见特异。_x000D_ _x000D_ 5.老年萎缩性子宫内膜。							1625208	全子宫+双侧附件	70	5	0	1	5	6	1	发现盆腔包块10余年，阴道分泌物增多半月	2	1	150	46	20.4444	两侧下肢深静脉无明显异常发现	两侧股总静脉、股浅静脉、腘静脉、胫后静脉未见扩张，以上血管内膜面平整, 血流通畅。_x000D_ 两侧小腿后侧肌群未见明显异常回声。	2.3	3.9	21.2	子宫及双侧附件切除标本：_x000D_ _x000D_ 1.右侧卵巢良性Brenner氏瘤。_x000D_ _x000D_ 2.子宫肌壁间平滑肌瘤。_x000D_ _x000D_ 3.宫颈慢性炎。_x000D_ _x000D_ 4.左侧卵巢未见特异；双侧输卵管未见特异。_x000D_ _x000D_ 5.老年萎缩性子宫内膜。	25.0	0.7	6.14	4.05	0.24	1.76	0	0	142	184	0	11.7	1
	1757168	江淑清														1757168		47	1	0	2	1	3	0	体检发现盆腔包块4年余，月经量增多半年。	1	腹腔镜下子宫平滑肌瘤剔除术;腹腔镜下盆腔粘连松解术;子宫整形术;脐整形术;经宫腔镜子宫内膜剥离术;宫腔镜下子宫粘膜下肌瘤电切术;诊断性刮宫术;2次手术经腹全子宫切除术;双侧输卵管卵巢切除术;肠粘连松解术;”，	54	165	19.8347			4.2	1.2	14.7		5.9	0.6	5.08	2.93	0.27	1.77	0	0	98	189	0
330327-1000736854	1586886	薛*玲	2019-05-05 10:52:00						子宫平滑肌瘤							1586886	肌瘤	41	1	0	2	1	3	0	月经量增多4年，加重2月	1	2	155	45.5	18.9386	两侧下肢深静脉无明显异常发现	两侧股总静脉、股浅静脉、胫后静脉、腘静脉及小腿肌间静脉丛未见扩张，以上血管内膜面平整, 管腔内未探及异常回声，探头加压管腔可压闭。CDFI示血流通畅。	3.3	1.6	13	标本满意度：满意_x000D_ 上皮细胞量>40%_x000D_ 诊断意见：未见上皮内病变或恶性病变（NILM）。	＜2	0.3	4.36	2.39	0.34	1.51	0	1	76	226	0	10.6	1
330382-0080941888	1692129	余*薇	2020-06-01 12:23:00						1、送检破碎子宫内膜呈分泌期图像，部分区呈息肉样改变。_x000D_ 2、“子宫”平滑肌瘤，部分区富于细胞性。_x000D_ 3、“左输卵管系膜”副中肾管囊肿。							1692129	肌瘤	37	1	0	2	1	3	0	发现盆腔包块逐渐增大10年余	2	2	158	51	20.4294	子宫肌瘤	经阴道探查：子宫大小正常，宫体前位，宫颈壁内见数个囊性暗区，大的约5×3mm，囊壁光滑（宫颈囊肿）。宫体壁内见数个低回声结节，大的约10×5×11mm，边界清，内部回声欠均匀。内膜厚7mm（双层）。两侧卵巢大小及内部回声正常。	1.37	1.4	36.8	1、送检破碎子宫内膜呈分泌期图像，部分区呈息肉样改变。_x000D_ 2、“子宫”平滑肌瘤，部分区富于细胞性。_x000D_ 3、“左输卵管系膜”副中肾管囊肿。	<0.8	1	6.62	4.44	0.27	1.83	1	0	127	241	0	10.3	1
	1726046	徐秋红														1726046		65	3	0	2	3	5	1	发现盆腔包块18天	2	腹腔镜下全子宫切除术;腹腔镜下双侧输卵管-卵巢切除术	55	162	20.9572			3.9	1.8	9.5		5.6		6.7	4.12	0.31	2.14	1	0	133	204	0	10.1	1
	1602306	施翠娥														1602306		54	2	0	5	2	7	0	发现盆腔包块10月	1	腹腔镜下全子宫切除术;腹腔镜下双侧输卵管-卵巢切除术;腹腔镜下盆腔粘连松解术;腹腔镜下阴道残端圆韧带悬吊术	64	157	25.9645			1.77	0.6	38		4.3	1.1	6.07	3.06	0.36	2.57	1	0	152	210	0	11.5	1
	1341204	仇连苏														1341204		57	2	0	1	2	3	1	反复左下腹胀痛8月	3	全子宫切除术;双侧输卵管-卵巢切除术;盆腔淋巴结根治性切除术;大网膜切除术;腹壁肿瘤切除术;阑尾切除术;小肠病损切除术;大肠病损切除术;肠系膜病损切除术	74	164	27.5134			1.06	0.8	221		5.6	0.8	6.75	4.77	0.22	1.59	0	1	105	348	0	10.4	1
330327-1000653459	1697070	肖*花	2020-06-16 12:06:00						1.子宫多发性平滑肌瘤。_x000D_ _x000D_ 2.宫颈慢性炎。_x000D_ _x000D_ 3.分泌期宫内膜。_x000D_ _x000D_ 4.双侧输卵管系膜副中肾管囊肿，一侧输卵管积水，另一侧无殊。_x000D_ _x000D_ 5.“腹膜肌瘤”平滑肌瘤。							1697070	全子宫+双侧输卵管	50	2	0	0	2	2	0	发现盆腔包块3年余，月经量增多2月余	1	1	159	59	23.3377	两侧下肢深静脉及小腿后侧肌群无明显异常发现_x000D_ _x000D_ （注：床旁超声检查提供信息有限，请酌情参考）	急诊床旁超声检查：_x000D_ 两侧股总静脉、股浅静脉、腘静脉、胫后静脉及腓静脉未见扩张，以上血管内膜面平整, 管腔内未探及异常回声，探头加压管腔可压闭，CDFI示血流通畅。_x000D_ 两侧小腿后侧肌群肌纹理清晰，未见明显异常团块回声，肌间静脉丛未见扩张，管腔内未探及异常回声，探头加压管腔可压闭，CDFI示血流充盈良好。_x000D_ _x000D_	2.27	1.3	12.3	1.子宫多发性平滑肌瘤。_x000D_ _x000D_ 2.宫颈慢性炎。_x000D_ _x000D_ 3.分泌期宫内膜。_x000D_ _x000D_ 4.双侧输卵管系膜副中肾管囊肿，一侧输卵管积水，另一侧无殊。_x000D_ _x000D_ 5.“腹膜肌瘤”平滑肌瘤。	16.4	1.1	7.1	3.72	0.54	2.44	1	0	81	441	1	11.1	1
330381-0075428052	1672757	袁*姑	2020-03-20 11:00:00						1、“子宫”平滑肌瘤。_x000D_ 2、“网膜”未见明显特异。							1672757	肌瘤	46	2	0	1	2	3	0	发现盆腔包块10月余	2	2	165	74	27.1809	子宫及两侧附件无明显异常发现	经阴道及腹部联合探查：子宫大小正常，宫体平位，宫壁回声正常，宫腔内未见明显异常回声，内膜厚4mm（双层）。两侧卵巢大小及内部回声正常。	3.17	1.9	10.3	1、“子宫”平滑肌瘤。_x000D_ 2、“网膜”未见明显特异。	13.2	0.7	6.46	3.54	0.41	2.45	1	0	131	322	0	9.8	1
	456279	张林女														456279		58	3	0	0	3	3	1	绝经2年余,阴道少量出血6天。	1	子宫切除+双侧卵巢动静脉高位结扎＋盆腔淋巴结清扫术	61	160	23.8281			2	1.2	12		19		8.1	5.4	0.3	2.3	1	0	120	476	1	6.2	0
0006713219	1715205	胡*芬	2020-08-18 11:25:00						子宫平滑肌瘤（富细胞）。							1715205	肌瘤	28	0	0	0	0	0	0	发现盆腔包块3年，异常阴道流血6月余	1	2	158	47	18.8271	肝胆脾胰肾输尿管及膀胱无明显异常发现	肝脏大小正常, 肝表面平整，肝缘锐利，内部回声偏粗, 分布均匀, 血管网络清晰，门静脉主干内径正常。胆囊大小正常, 囊壁薄, 囊内未见异常回声。胆总管及肝内胆管无扩张。脾脏无肿大。胰腺头、体部未见明显异常回声，尾部因胃肠气体遮盖显示不清。_x000D_ 两肾大小正常，左肾中极皮质内见一大小约9×7mm的偏强回声结节，边界清，内部回声欠均匀（小错构瘤）。右肾回声无殊。两侧输尿管无扩张。膀胱充盈可，内未见明显异常回声。_x000D_	1.6	2.9	14.3	子宫平滑肌瘤（富细胞）。	77	1	4.8	2.02	0.39	2.28	1	0	101	360	0	10.4	1
330327-1000474261	1551426	曾*云	2019-01-07 16:13:00						子宫+双侧输卵管切除标本：_x000D_ _x000D_ 1、子宫多发平滑肌瘤。_x000D_ _x000D_ 2、宫颈慢性炎伴鳞化。_x000D_ _x000D_ 3、增生期宫内膜。_x000D_ _x000D_ 4、一侧输卵管系膜副中肾管囊肿，双侧输卵管未见特异。							1551426	全子宫+双侧输卵管	51	2	0	0	2	2	0	发现盆腔包块1年，经期延长1月	1	1	164	61	22.68	两侧下肢深静脉无明显异常发现	两侧股总静脉、股浅静脉、腘静脉、胫后静脉及小腿肌间静脉丛未见扩张，以上血管内膜面平整, 血流通畅。	1.9	0.6	12.6	子宫+双侧输卵管切除标本：_x000D_ _x000D_ 1、子宫多发平滑肌瘤。_x000D_ _x000D_ 2、宫颈慢性炎伴鳞化。_x000D_ _x000D_ 3、增生期宫内膜。_x000D_ _x000D_ 4、一侧输卵管系膜副中肾管囊肿，双侧输卵管未见特异。	6.9	2.1	3.86	2.12	0.17	1.55	0	1	139	359	0	9.3	1
	1489489	王爱芬														1489489		64	2	0	0	2	2	1	绝经后阴道流血半月	1	经腹筋膜外全子宫切除术;双侧输卵管-卵巢切除术	65	158	26.0375				2.8	9.3		5.8	0.5	4.89	2.56	0.22	1.99	1	0	133	170	0	9.5	1
0070245999	1562596	陈*飞	2019-02-19 11:18:00						“子宫”平滑肌瘤。							1562596	肌瘤	41	1	0	1	1	2	0	发现盆腔包块18天	2	2	160	75	29.2969	两侧下肢深静脉无明显异常发现	两侧股总静脉、股浅静脉、腘静脉、胫后静脉及小腿肌间静脉丛未见扩张，以上血管内膜面平整, 血流通畅。	2.32	0.8	22.3	“子宫”平滑肌瘤。	12.2	2	11.15	5.25	0.49	5.18	1	0	136	326	0	9.6	1
330382-0080286841	1517120	高*	2018-09-12 08:56:00						送检子宫+双侧输卵管标本：_x000D_ 1、子宫肌壁间多发平滑肌瘤（富细胞型）_x000D_ 2、宫颈慢性炎伴纳氏囊肿。_x000D_ 3、分泌期宫内膜。_x000D_							1517120	全子宫+双侧输卵管	44	2	0	1	2	3	0	发现盆腔包块10年，经量增多2年余	1	1	161	64	24.6904	两侧下肢深静脉无明显异常发现	两侧股总静脉、股浅静脉、腘静脉、胫后静脉未见扩张，以上血管内膜面平整, 血流通畅。两侧小腿肌间静脉丛未见明显曲张。		0.9	7.6	送检子宫+双侧输卵管标本：_x000D_ 1、子宫肌壁间多发平滑肌瘤（富细胞型）_x000D_ 2、宫颈慢性炎伴纳氏囊肿。_x000D_ 3、分泌期宫内膜。_x000D_	4.0	0.7	4.34	2.45	0.28	1.52	0	1	101	275	0	11.0	1
330382-0000918872	1683631	郑*妃	2020-05-09 12:40:00						子宫平滑肌瘤							1683631	肌瘤	42	2	0	1	2	3	0	尿频1月余，发现盆腔包块1月	2	2	160	60	23.4375	两侧下肢深静脉无明显异常发现	两侧股总静脉、股浅静脉、腘静脉、胫后静脉未见扩张，以上血管内膜面平整, 血流通畅。两侧小腿后侧肌群未见明显异常回声。	2.17	0.9	41.8	标本满意度：满意_x000D_ 上皮细胞量＞40% _x000D_ 诊断意见：未见上皮内病变或恶性病变（NILM）。_x000D_	2.8	0.9	5.97	3.38	0.22	2.30	1	0	126	340	0	10.4	1
330322-1065245	1216313	王*芬	2019-04-24 15:04:00						1、“子宫”平滑肌瘤。_x000D_ _x000D_ 2、送检破碎子宫内膜呈增生期图像，另见少许宫颈管粘膜鳞化。							1216313	肌瘤	44	1	0	0	1	1	0	发现盆腔包块2月	2	2	158	60	24.0346	两侧下肢深静脉无明显异常发现	两侧股总静脉、股浅静脉、腘静脉、胫后静脉及小腿肌间静脉丛未见扩张，以上血管内膜面平整, 血流通畅。	1.98	0.9	27.8	1、“子宫”平滑肌瘤。_x000D_ _x000D_ 2、送检破碎子宫内膜呈增生期图像，另见少许宫颈管粘膜鳞化。	3.9	0.5	5.97	3.38	0.22	2.3	1	0	126	340	0	13.1	1
	597072	徐妹玉														597072		62	3	0	2	3	5	1	绝经7年，阴道出血22天	1	全子宫双附件切除＋卵巢动静脉高位结扎+大网膜切除＋盆腔淋巴结清扫术	61	158	24.4352			3	2.3	19.5		2		7.5	5.4	0.1	1.8	0	0	110	305	0	6.4	0
05253591	1722065	陈*珍	2020-09-09 12:25:38						1、“子宫肌瘤1、2、3”平滑肌瘤（灶区富于细胞型）。_x000D_ _x000D_ 2、“左侧输卵管”系膜副中肾管囊肿。							1722065	肌瘤	45	2	0	0	2	2	0	月经不规则伴经期延长半年余	1	2	160	51	19.9219	右侧甲状腺结节 TI-RADS 3类_x000D_ 两侧乳腺结节 BI-RADS 3类_x000D_ 两侧乳腺囊肿 BI-RADS 2类	两侧甲状腺大小正常，包膜清晰、光滑，内部回声纤细，分布均匀，右侧下极见一大小约5×2×3mm的低回声结节，边界清，内部回声欠均匀。_x000D_ 两侧乳腺回声欠均匀，腺体排列欠规则，乳腺导管未见明显扩张。_x000D_ 左侧乳腺1B区见二个低回声结节，大的约10×5×7mm，右侧乳腺12B区见一大小约7×3×6mm的低回声结节，边界清，内部回声欠均匀。_x000D_ 两侧乳腺内均见数个囊性暗区，左侧大的约8×3mm，右侧大的约6×3mm。	1.7	5.4	12.2	1、“子宫肌瘤1、2、3”平滑肌瘤（灶区富于细胞型）。_x000D_ _x000D_ 2、“左侧输卵管”系膜副中肾管囊肿。	18.8	0.5	4.02	2.4	0.27	1.23	0	1	106	283	0	9.9	1
330326-1000454020	1562094	方*微	2019-02-14 11:51:00						1.“子宫”平滑肌瘤。_x000D_ 2.“子宫内膜及息肉”符合子宫内膜息肉。_x000D_ 3.符合“右输卵管”系膜副中肾管囊肿。							1562094	肌瘤	41	2	0	2	2	4	0	发现盆腔包块5年余，经量增多1年	1	2	155	52	21.6441	两侧下肢深静脉无明显异常发现	两侧股总静脉、股浅静脉、腘静脉、胫后静脉及小腿肌间静脉未见扩张，以上血管内膜面平整, 血流通畅。		＜0.5	23.9	1.“子宫”平滑肌瘤。_x000D_ 2.“子宫内膜及息肉”符合子宫内膜息肉。_x000D_ 3.符合“右输卵管”系膜副中肾管囊肿。	＜2	0.5	8.1	4.98	0.59	2.33	1	0	90	512	1	9.5	1
00011411102276	1488945	颜*雪	2018-06-05 10:41:00						“子宫”平滑肌瘤。							1488945	全子宫+双侧输卵管	50	2	0	1	2	3	0	发现盆腔包块8年，经量增多2年，包块增大4天	2	1	171	85	29.0688	脂肪肝	肝脏大小正常，内部回声偏强、细密，后方有声衰减，血管网络欠清，门静脉主干内径正常。胆囊大小正常，囊壁薄，囊内未见异常回声。胆总管及肝内胆管无扩张。脾脏无肿大。胰腺头、体部未见明显异常回声，尾部因胃肠气体遮盖显示不清。_x000D_ 两肾形态大小及内部回声正常。两侧输尿管无扩张。膀胱充盈差，内未见明显异常回声。	2.72	1.3	8.7	“子宫”平滑肌瘤。	5.0	0.4	6.14	3.47	0.47	2.09	1	0	101	420	1	9.7	1
330382-0080193663	1468410	倪*萍							子宫多发性平滑肌瘤							1468410	全子宫+双侧输卵管	41	2	0	2	2	4	0	发现盆腔包块伴增大10余年，月经改变2月	1	1	160	82	32.0312	两侧下肢深静脉无明显异常发现	两侧股总静脉、股浅静脉、腘静脉、胫后静脉及小腿肌间静脉丛未见扩张，以上血管内膜面平整, 血流通畅。	1.64	0.5	10.0	未见上皮内病变或恶性病变（NILM）。	3.5	0.8	7.56	4.65	0.47	2.3	1	0	81	547	1	9.9	1
330324-1110178	1476631	郑*英	2018-04-24 13:09:00						1、子宫多发性平滑肌瘤。 2、送检“右输卵管系膜囊肿”镜下为梭型细胞肿瘤，符合平滑肌瘤。							1476631		41	2	0	0	2	2	0		1		150	64.5	28.6667			1.78	0.3	11.2		4.9	0.8	6.14	3.61	0.62	1.87	1	0	82	299	0	11.1
330381-0000241068	868006	周*敏	2020-09-02 14:19:00						子宫+双侧输卵管标本： 1、子宫多发平滑肌瘤。 2、宫颈慢性炎伴鳞化。 3、增生期宫内膜。 4、双侧输卵管未见特异。							868006		45	0	1	0	1	1	0		2		155	43	17.898			1.26	3.2			10.3		7.21	5.02	0.37	1.76	0	0	131	222	0	12.1
330327-1000263051	1585006	杨*月	2019-04-25 15:37:00						1、子宫平滑肌瘤。 2、“双”输卵管系膜副中肾管囊肿。							1585006		38	1	0	2	1	3	0		1		155	59	24.5578			1.78	1.2	14.3		8.9	0.8	10.06	5.88	0.68	3.13	1	0	143	390	1	9.9
0075253727	1408149	刘*华	2017-08-15 15:57:00						1、“子宫”多发平滑肌瘤。 2、“宫颈”粘膜慢性炎，可见挖空样细胞，建议HPV检测。 3、子宫腺肌症。 3、增生期宫内膜，部分腺体呈不规则增生。 4、送检“双侧输卵管”未见特异。							1408149		44	2	0	4	2	6	0		2		158	53	21.2306			1.73	1.9	13.9		5.4	1.3	3.45	1.58	0.31	1.51	0	1	111	226	0	11.4
0001025088	1642289	郑*平	2019-10-23 13:43:00						子宫+双侧输卵管切除标本（宫颈活检术后）： 1、宫颈慢性炎伴纳氏囊肿。 2、子宫多发平滑肌瘤。 3、分泌期宫内膜，子宫内膜息肉。 4、“左卵巢结节”纤维增生性结节。							1642289		49	1	0	0	1	1	0				166	65	23.5883			2.1	1.8	24.6		24.2	0.3	8.52	6.82	0.5	1.08	0	2	123	356	0	10.4
330782-479324	1515473	胡*香	2018-09-06 10:12:00						“子宫”平滑肌瘤，部分区富于细胞。							1515473		47	2	0	0	2	2	0				168	69.5	24.6244			35	0.6	11		＜2	0.7	4.51	2.21	0.44	1.81	0	0	125	351	0	9.0
330326-1000094654	1167325	杨*红	2020-04-24 16:52:00						全子宫+双输卵管标本： 1、子宫平滑肌瘤。 2、慢性宫颈炎伴纳氏囊肿。 3、增生期宫内膜。 4、双侧输卵管未见明显特异。							1167325		46	2	0	6	2	8	0				166	66	23.9512			3.58	1.1	32.1		<0.8	0.6	6.06	2.6	0.68	2.47	1	0	85	636	1	8.7
00011301165617	1662219	李*燕	2020-01-06 16:06:00						1、子宫多发性平滑肌瘤。 2、宫颈慢性炎伴鳞化。 3、子宫内膜息肉。 4、增生期宫内膜。 5、一侧输卵管未见特异，另一侧输卵管积水。							1662219		44	2	0	1	2	3	0				160	62	24.2188			2.39	1.2	20.3		8.0	0.4	8.16	4.7	0.56	2.67	1	0	103	512	1	9.7
0001081958	619096	王*玲	2018-12-10 13:43:00						1、“子宫”平滑肌瘤。 2、“左侧”输卵管无殊。 3、子宫内膜息肉。 4、“右侧”输卵管慢性炎。							619096		53	2	0	0	2	2	0				163	57.5	21.6418			3.1	1.7	11.4		28.4	0.9	4.25	2.7	0.24	1.28	0	1	132	225	0	11.7
330381-0000222631	1716904	薛*娜	2020-08-21 12:55:00						1.子宫粘膜下平滑肌瘤，增生期子宫内膜。 2.“子宫”平滑肌瘤。							1716904		40	1	0	0	1	1	0				162	52.5	20.0046			3.4	1.9	27.7		16.8	0.5	5.3	2.95	0.36	1.96	1	0	139	266	0	9.9
330326-1000345804	1612504	泮*金	2019-07-19 17:23:00						子宫+双侧输卵管标本： 1.子宫多发性平滑肌瘤。 2.分泌期宫内膜。 3.宫颈慢性炎。 4.一侧输卵管系膜副中肾管囊肿，另一侧输卵管未见异常。							1612504		52	2	0	0	2	2	0				158	55	22.0317			2.9	1.1	19.1		2.3		5.69	3.68	0.43	1.44	0	0	107	350	0
330381-0000744190	1600361	庄*约	2019-06-13 16:52:00						1、“左侧卵巢赘生物”卵泡膜纤维瘤。 2、“双侧输卵管”系膜副中肾管囊肿。 3、子宫平滑肌瘤。							1600361		35	2	0	0	2	2	0				157	55	22.3133			2.6	1.4	12.8		20.4	0.6	4.13	1.97	0.28	1.83	1	0	114	231	0	12.0
0005570414	1580318	王*洁	2019-04-10 15:56:00						子宫+双侧输卵管切除标本： 1.子宫多发性平滑肌瘤伴玻璃样变。 2.宫颈慢性炎。 3.分泌期宫内膜。 4.双侧输卵管未见特异。							1580318		40	1	0	0	1	1	0				153	61.5	26.2719			1.79	1	22.3		6.4	1	7.14	4.02	0.53	2.50	1	0	129	284	0	10.7
00010810353725	1440013	叶*珍	2017-12-08 10:42:00						1、“双侧”输卵管系膜副中肾管囊肿。_x000D_ 2、“子宫”平滑肌瘤。							1440013		40	2	0	0	2	2	0				155	48	19.9792			4.1	1.9	30.4		32.5	0.4	7.14	4.94	0.41	1.74	0	0	114	258	0	9.9
00011411738019	1639539	李*荣	2019-10-15 12:35:00						1、“子宫”平滑肌瘤。_x000D_ _x000D_ 2、“子宫”分泌期宫内膜。							1639539		31	1	0	2	1	3	0				160	52.5	20.5078			6.1	＜0.5	23.1		10.3	1.1	6.75	4.59	0.34	1.71	0	0	135	228	0	9.8
0005965177	1404171	张*嫦	2019-02-19 09:28:00						“子宫”平滑肌瘤。							1404171		38	2	0	2	2	4	0				156	60	24.6548			1.47	2.9	11.8		23.2		4.07	2.74	0.31	0.98	0	2	146	242	0	11.0
330324-1000425011	1740554	胡*华	2020-11-16 15:30:22						1、“子宫肌瘤”平滑肌瘤。 2、“子宫内膜”镜下见小块增生期宫内膜，另见粘膜下平滑肌瘤。							1740554		46	2	0	0	2	2	0				160	60	23.4375			2.26	0.5	31.6		2.4	0.8	3.97	2.64	0.27	1.04	0	2	102	404	1	8.6
0076791733	1527994	张*	2018-10-23 17:38:00						“子宫”平滑肌瘤。							1527994		42	2	0	0	2	2	0				147	54	24.9896			2.87	1.2	54.8		8.3	0.8	10.19	6.64	0.48	3.00	1	0	77	402	1	9.6
0075154509	1370130	黄*梅	2017-03-22 16:04:00						子宫+双侧输卵管标本： 1、子宫多发性平滑肌瘤。 2、宫颈慢性炎。 3、增生期宫内膜。 4、“两侧”输卵管未见特异。							1370130		46	1	0	1	1	2	0				159	64	25.3155			2.37	2.4	13.6		9.2		5.98	3.65	0.03	2.27	1	0	139	194	0	12
330381-8201683707	1447360	余*琴	2018-01-04 20:50:00						1、“子宫”多发性平滑肌瘤； 2、“左输卵管系膜”副中肾管囊肿。							1447360		39	1	0	0	1	1	0				148	36	16.4354				0.4	25.3		5.6	1.4	5.18	2.26	0.52	2.24	1	0	144	202	0	11.4
0075249420	1402022	林*平	2017-07-21 19:03:00						“子宫+右侧输卵管”切除标本： 1. 子宫多发性平滑肌瘤。 2. 分泌期宫内膜。 3. 宫颈轻度慢性炎。 4. 右输卵管积水。							1402022		50	2	0	5	2	7	0				164	54.4	20.2261			2.24	1.3	13.6		17.9		7.22	4.09	0.67	2.25	1	0	106	408	1	10.8
0070475676	1681027	吴*平	2020-04-15 10:33:00						“子宫肌瘤”平滑肌瘤。							1681027		44	1	0	2	1	3	0				160	61	23.8281			1.79	0.9	21.4		11.8		5.99	4.27	0.32	1.36	0	0	134	223	0	12.0
0076797523	1257503	朱*乐	2020-10-29 10:31:10						1.“子宫”平滑肌瘤。 2.子宫内膜呈增生期图像。							1257503		44	2	0	1	2	3	0				162	59	22.4813			2.9	0.8	66.2		90.8		5.98	3.65	0.03	2.27	1	0	139	194	0	9.3
330381-0000978797	1508290	张*华	2018-08-16 16:27:00						1、“子宫”平滑肌瘤。 2、“右侧输卵管”系膜副中肾管囊肿。							1508290		45	2	0	1	2	3	0				165	60	22.0386			1.45	1.1	19.4		3.1		6.15	3.81	0.4	1.57	0	1	134	250	0	11.9
330326-1000051976	1110746	郭*秋	2015-09-16 12:28:00						1、“左侧卵巢结节”符合卵泡膜细胞增生结节。 2、“子宫”平滑肌瘤。 3、“右侧”卵巢冠囊肿。							1110746		43	2	0	1	2	3	0				159	51	20.1733			2.74	1.5	13.9		27.4		6.52	4.55	0.56	1.31	0	1	89	284	0
00011410577862	1377515	黄*燕	2017-04-27 14:00:00						子宫+双输卵管标本： 1、子宫多发性平滑肌瘤。 2、增生期宫内膜伴灶区不规则增生。 3、宫颈慢性炎。 4、“一侧”输卵管积水，“另一侧”输卵管慢性炎。							1377515		48	2	0	0	2	2	0				160	65	25.3906			2.97	2	13.4		5.2		6.36	3.61	0.5	1.94	1	0	121	232	0	10.6
330382-0000001353	1348745	徐*珍	2016-12-29 14:10:00						“子宫”平滑肌瘤。							1348745		47	1	0	2	1	3	0				160	54	21.0938			3.37	1.3	24.2		3.3		5.75	3.11	0.45	2.10	1	0	143	198	0	13.4
02045574	1697678	谢*	2020-06-16 14:50:00						1、“左输卵管系膜囊肿”系膜副中肾管。 2、“右输卵管系膜囊肿”系膜副中肾管。 3、“子宫肌瘤”平滑肌瘤。							1697678		46	2	0	1	2	3	0				158	57.5	23.0332			2.24	0.8	8.2		2.7		5.59	2.69	0.47	1.90	1	0	131	338	0	10.0
0001117760	1577452	陈*妹	2019-04-01 13:50:00						1、“子宫”平滑肌瘤。 2、送检“子宫内膜”符合宫内膜息肉伴增生期宫内膜。							1577452		49	2	0	1	2	3	0				163	60	22.5827			2.5	1.1	12.2		4.3		3.91	2.08	0.34	1.40	0	1	104	279	0	11.1
330324-916238	1551777	陈*晶	2019-01-07 14:44:00						1、“子宫”平滑肌瘤。 2、“左、右输卵管系膜”副中肾管囊肿。 3、宫颈息肉伴鳞化，另见少量流血期宫内膜。							1551777		41	2	0	1	2	3	0				158	55	22.0317			2.72	1.3	24.6		6.0		6.59	4.84	0.33	1.41	0	0	125	205	0	10.9
330324-1000136468	1593530	高*琴	2019-05-28 09:25:00						子宫+双侧输卵管标本： 1、子宫多发性平滑肌瘤。 2、宫颈慢性炎。 3、增生期宫内膜。 4、双侧输卵管未见特异。							1593530		52	2	0	1	2	3	0				150	58	25.7778			2.45	0.8	11.1		4.5		6.37	3.13	0.32	2.82	1	0	125	299	0	9.9
330327-1002494606	1675728	项*芬	2020-03-16 09:05:00						子宫+双侧输卵管切除标本： 1、子宫多发平滑肌瘤。 1、宫颈慢性炎伴鳞化。 2、增生期宫内膜。 4、“双侧”输卵管慢性炎伴一侧副中肾管囊肿。							1675728		48	2	0	2	2	4	0				164	66	24.539			0.56	1.3	8.8		10.0		6.46	3.54	0.35	2.5	1	0	137	349	0	9.7
00011301750705	1166001	李*晓	2014-12-04 14:00:00						子宫多发性平滑肌瘤（2个）。							1166001		37	2	0	2	2	4	0				158	64	25.6369					35.2				7.31	5.45	0.43	1.38	0	1	130	210	0	11.1
330327-1000759346	1607395	叶*缘	2019-07-08 18:05:00						子宫+双输卵管切除标本： 1.子宫平滑肌瘤。 2.宫颈慢性炎。 3.增生期宫内膜。 4.双侧输卵管未见特异，另见一侧输卵管系膜副中肾管囊肿。							1607395		45	2	0	2	2	4	0				150	52	23.1111			3.16	1.8	52.0		<0.8		4.34	2.08	0.33	1.91	1	0	120	245	0	10.4
331021-YL217620	1744560	陈*孟	2020-12-17 11:15:00						子宫及双输卵管切除标本： 1.子宫平滑肌瘤。 2.宫颈慢性炎。 3.增生期宫内膜。 4.双侧输卵管未见明显特异。							1744560		45	2	0	2	2	4	0				167	66	23.6652			1.46	0.9	13.3		4.6		4.87	2.75	0.32	1.73	0	0	106	284	0	9.8
00011411712495	1713405	史*妹	2020-10-28 12:10:00						1.“子宫”平滑肌瘤。 2.“子宫内膜”少许破碎子宫内膜呈增生期图像。 3.“宫颈管赘生物”见破碎纤维性间质成分，微量上皮未见异型。 4.“右输卵管系膜囊肿”系膜副中肾管囊肿。							1713405		40	2	0	3	2	5	0				155	45	18.7305			1.85	0.3	19.3		5.0		6.5	4.16	0.39	1.86	1	0	103	312	0	10.7
330382-0000041487	1653041	黄*珍	2019-11-25 12:30:00						子宫及双附件标本： 1、子宫平滑肌瘤。 2、宫颈慢性炎。 3、萎缩性宫内膜。 4、双侧附件未见明显特异。							1653041		61	2	0	1	2	3	1				155	66	27.4714			3.86	1.2	7.6		9.8		4.96	2.3	0.4	2.08	1	0	141	316	0	10.2
00019500010024	1506854	陈*珍	2018-08-27 13:14:00						1.子宫多发平滑肌瘤。 2.宫壁分泌早期子宫内膜。 3.宫颈、双侧输卵管未见特异。							1506854		40	2	0	2	2	4	0				162	48	18.2899			1.24	2.9	14.8		7.5		6.33	4.34	0.33	1.55	0	0	104	392	1	9.2
330381-0075680539	1586476	黄*禄	2019-04-29 17:09:00						全子宫+双侧输卵管标本： 1、子宫平滑肌瘤。 2、增生期宫内膜。 3、宫颈慢性炎。 4、双侧输卵管未见明显特异。							1586476		51	2	0	0	2	2	1				162	58	22.1003			2.09	0.7	14.2		3.4		5.21	2.58	0.37	2.18	1	0	135	307	0	11.1
330381-0000342367	1700499	戴*武	2020-06-29 12:30:00						“子宫”平滑肌瘤。							1700499		43	1	0	0	1	1	0				153	49	20.9321			2.9	1.5	17.5		24.9	0.5	8	4.59	0.51	2.74	1	0	135	292	0	9.4
00011411841473	1723201	崔*芳	2020-09-16 17:47:09						1、“子宫”平滑肌瘤。 2、“右输卵管系膜”副中肾管囊肿。							1723201		39	2	0	2	2	4	0				150	50	22.2222			6.3	0.9	25.1		＜2	1	6.18	4.06	0.47	1.51	0	1	126	240	0	8.8
0075133410	1403757	吴*珍	2017-08-03 11:53:00						1、子宫多发平滑肌瘤。 2、“疑似内膜息肉”粘膜下平滑肌瘤。 3、宫颈CIN 慢性炎。 4、分泌期宫内膜。 5、“一侧输卵管及系膜囊肿”：副中肾管囊肿。“另一侧输卵管”未见特异。							1403757		48	1	0	1	1	2	0				159	55	21.7555			2.5	0.6	69.1		12.1		4.16	2.39	0.32	1.38	0	1	105	277	0	9.9
330322-1034256	1734842	侯*芬	2020-10-23 11:07:03						1.“子宫”平滑肌瘤。 2.子宫内膜息肉，腺体呈增生期图像。							1734842		49	1	0	2	1	3	0				162	65	24.7676			7.1	1.5	21.9		＜2	1	10.49	7.12	0.66	2.53	1	0	142	262	0	11.6
330327-1000274501	1724008	黄*玉	2020-09-16 10:50:00						子宫+双侧输卵管切除标本： 1.子宫多发性平滑肌瘤； 2.宫颈粘膜慢性炎伴鳞化； 3.分泌期宫内膜； 4.双侧输卵管慢性炎伴系膜副中肾管囊肿。							1724008		51	2	0	1	2	3	0				165	62.5	22.9568			2.39	0.7	11.4		2.3	0.6	7.34	5.19	0.64	1.46	0	1	96	333	0	10.5
0000174308	1295995	李*娟	2016-07-05 09:10:00						1、子宫内膜息肉。 2、子宫平滑肌瘤。 3、宫颈慢性炎。 4、增生期宫内膜。 5、两侧输卵管副中肾管囊肿。							1295995		48	1	0	0	1	1	0				156	55	22.6003					21.6				4.7	1.77	0.37	2.15	1	0	116	341	0	9.4
00011411172766	1732485	吴*华	2020-10-22 09:10:00						1.“子宫肌瘤”子宫平滑肌瘤。 2.“左侧”输卵管轻度积水，可见系膜副中肾管囊肿。 3.“右侧”输卵管未见特异，可见系膜副中肾管囊肿。 4.子宫内膜息肉，增生期宫内膜。							1732485		44	2	0	3	2	5	0				160	78	30.4688			2.81	0.9	14.1		18.3		6.1	3.51	0.45	1.91	1	0	79	322	0	9.7
330381-0075798046	1697175	曾*奶	2020-06-17 16:56:00						子宫+双侧输卵管切除标本： 1.子宫多发平滑肌瘤伴玻璃样变。 2.宫颈慢性炎伴鳞化。 3.增生期宫内膜。 4.一侧输卵管系膜副中肾管囊肿，两侧输卵管未见明显特异。							1697175		50	1	0	0	1	1	0				145	47	22.3543			1.49	0.8	13.4		8.7		7.52	5.36	0.63	1.46	0	0	78	379	0
330327-1001034702	1521338	章*娟	2018-09-27 12:51:00						子宫+双侧输卵管标本： 1、子宫平滑肌瘤。 2、宫颈慢性炎。 3、增生期子宫内膜。 4、双侧输卵管慢性炎，一侧符合积水。							1521338		47	2	0	1	2	3	0				155	60	24.974			2.39	2.2	24.6		15.5		7.35	4.83	0.64	1.74	0	0	113	265	0	10.8
330326-484200	1562922	孔*叶	2019-02-20 14:58:00						1.“左侧卵巢”符合单纯性囊肿。 2.“部分子宫肌瘤”符合平滑肌瘤。							1562922		35	1	0	4	1	5	0				163	80	30.1103			3.09	1	14.1		16.6		9.21	6.45	0.53	2.09	1	0	139	244	0	11.8
00011410802418	1451438	胡*琴	2018-01-22 15:50:00						1、“子宫”平滑肌瘤。_x000D_ _x000D_ 2、“左”卵巢黄体囊肿。							1451438		36	1	1	3	2	5	0				156	51	20.9566			2	＜0.5	9.9		2.2	0.7	3.53	1.87	0.4	1.23	0	1	119	199	0	10.8
330381-0000365721	1519249	魏*和	2019-12-05 09:46:00						1、“子宫”平滑肌瘤。 2、一侧输卵管系膜副中肾管囊肿，双侧输卵管未见特异。							1519249		46	3	0	2	3	5	0				153	47.5	20.2913			3.45	2.8	11.5		<0.8		4.07	2.67	0.3	1.04	0	2	137	157	0	12.3
330381-8201706873	1379685	邵*平	2017-04-28 13:35:00						1、“右输卵管”系膜副中肾管囊肿。 2、“子宫”平滑肌瘤。							1379685		41	1	0	2	1	3	0				163	65	24.4646			4.49	1.7	19.5		14.4		4.71	3.18	0.34	1.17	0	2	137	335	0	9.6
330324-1000385590	1691811	朱*仙	2020-05-27 14:51:00						“子宫+双侧输卵管”切除标本： 1.子宫多发性平滑肌瘤。 2.宫颈慢性炎伴鳞化。 3.宫内膜呈分泌期图像。 4.一侧输卵管系膜副中肾管囊肿，双侧输卵管未见明显特异。							1691811		46	2	0	1	2	3	0				160	58	22.6562			2.88	0.8	18.8		10.9		8.54	6.1	0.37	2	1	0	80	450	1	10.4
330327-1000310209	1578068	林*珍	2019-04-04 13:12:00						子宫+双侧输卵管： 1.子宫平滑肌瘤。 2.子宫内膜息肉，早分泌期子宫内膜。 3.宫颈慢性炎。 4.双侧输卵管积水。							1578068		47	2	0	0	2	2	0				168	72.5	25.6874			2.7	1.6	22.3		14.3	0.7	9.77	6.11	0.72	2.84	1	0	133	408	1	9.6
330327-1001114710	1599040	曹*芝	2019-06-11 17:08:00						1、子宫平滑肌瘤。 2、“左”输卵管系膜副中肾管囊肿。							1599040		42	2	0	8	2	10	0				150	52	23.1111			2.63	1.8	56		42.1		5.06	2.77	0.22	1.71	0	0	101	330	0	10.3
330328-1001386235	1613727	林*绿	2019-07-22 10:42:00						子宫+双侧输卵管切除标本： 1、子宫多发平滑肌瘤。 2、宫颈慢性炎。 3、分泌期宫内膜。 4、双侧输卵管未见特异。							1613727		51	3	0	0	3	3	0				157	65	26.3702			2.21	1	6.4		1.5		5.64	2.83	0.69	2.07	1	0	137	238	0	11.9
330324-1000623577	1460160	余*月	2018-02-27 15:35:00						1、“子宫”平滑肌瘤。 2、“右输卵管系膜”副中肾管囊肿。							1460160		39	2	0	2	2	4	0				154	56.5	23.8236			4.55	0.8	10.5			1.2	7.27	4.89	0.34	1.93	1	0	127	193	0	10.6
00019500474280	1612386	陈*琛	2019-07-24 11:57:00						1、“子宫”平滑肌瘤。 2、“双侧输卵管”副中肾管囊肿。 3、破碎子宫内膜呈增生期图像，游离鳞状上皮及颈管腺体未见特异。							1612386		39	1	0	2	1	3	0				160	53	20.7031			0.94	2.3	29.2		10.7		6.76	4.58	0.5	1.63	0	0	125	354	0	10.0
0004079992	828645	周*舞	2019-11-18 10:35:00						子宫及双侧输卵管切除标本： 1、子宫多发平滑肌瘤。 2、宫颈慢性炎。 3、分泌期宫内膜。 4、双侧输卵管系膜副中肾管囊肿。							828645		48	1	0	2	1	3	0				160	66	25.7812			1.99	2.4	6.8		14.7		5.98	3.71	0.45	1.78	0	0	111	260	0	11.9
330382-0000115621	1689397	杨*乐	2020-05-21 12:07:00						1、子宫+双侧输卵管标本： 1）子宫多发平滑肌瘤，部分区富于细胞。 2）宫颈慢性炎。 3）增生期宫内膜。 4）双侧输卵管未见特异，可见系膜副中肾管囊肿。 2、“右卵巢囊肿”符合滤泡囊肿伴出血。							1689397		45	1	0	2	1	3	0				158	85	34.049			3.64	1.2	12.2		3.4		6	3.17	0.35	2.43	1	0	124	301	0	9.8
330381-0000377558	1640600	黄*新							1、“右侧输卵管系膜”副中肾管囊肿。 2、“宫颈管”息肉，另见少量增生期宫内膜。 3、送检组织符合“黏膜下”子宫平滑肌瘤。 4、增生期宫内膜。 5、“子宫”平滑肌瘤。							1640600		48	1	0	1	1	2	0				155	46	19.1467			52.1	2.6	21.6		＜2		5.71	3.8	0.4	1.43	0	1	135	281	0	9.8
0070445646	1344228	吴*珍							1、子宫多发性平滑肌瘤。 2、子宫内膜增生期图像。							1344228		41	2	0	1	2	3	0				161	66	25.462			1.37	1.1	22.5		9.9		5.84	3.1	0.37	2.31	1	0	104	379	0	9.8
330326-1000210423	1631103	温*红							“子宫肌瘤+内膜”平滑肌瘤；未见明显内膜组织。							1631103		42	1	0	0	1	1	0				169	65.5	22.9334			1.61	0.5	22.9		5.2		8.92	4.87	0.88	3.02	1	0	101	329	0	10.8
330324-1000488338	1148738	宁*平							1、“子宫”平滑肌瘤。 2、送检“宫壁结节”符合平滑肌瘤。 3、送检“右侧卵巢旁结节”卵巢间质内见散在分化良好的腺体，考虑为生发上皮增生。 4、“右侧输卵管系膜囊肿”符合系膜副中肾管囊肿。							1148738		46	2	0	0	2	2	0				160	66	25.7812			2.2	1.3	12.4		2.8	0.8	7.66	4.79	0.41	2.43	1	0	84	326	0	9.8
330382-0001188347	1667215	杨*婷							1、“子宫”平滑肌瘤。 2、“左侧”输卵管系膜副中肾管囊肿。 3、“右侧”输卵管系膜副中肾管囊肿。							1667215		36	1	0	0	1	1	0				160	49	19.1406			2.17	1.6	13.5		10.9		4.68	2.21	0.32	2.05	1	0	112	311	0	10.8
330381-F74142569	1739303	郑*莲							“子宫肌瘤”平滑肌瘤。							1739303		42	1	0	0	1	1	0				155	64	26.6389			2.3	1.1	46.3		35.8		6.33	3.92	0.53	1.67	0	0	91	386	1	10.3
330381-0000836266	1617341	陈*							1、“子宫肌瘤”平滑肌瘤。 2、“右侧输卵管系膜囊肿”副中肾管囊肿。							1617341		41	2	0	1	2	3	0				160	56	21.875			2.6	2.6	53.9		33.3		5.33	3.55	0.41	1.31	0	1	99	343	0	9.3
330324-1000525925	1105958	李*芬							子宫+双侧输卵管： 1.子宫平滑肌瘤。 2.宫颈慢性炎。 3.增生期子宫内膜。 4.双侧输卵管未见明显异常。							1105958		48	2	0	2	2	4	0				150	49	21.7778			1.87	1.5	28.4		58.4		5.9	4.74	0.3	0.84	0	2	117	287	0	10.4
330327-1000977126	1631077	冯*							1.“子宫”平滑肌瘤。 2.子宫内膜腺体呈增生期图像。							1631077		38	1	0	1	1	2	0				163	60	22.5827			3.97	0.6	17.7		12.0		4.38	2.03	0.33	1.97	1	0	93	393	1	9.9
330381-0000297454	1258122	蔡*红							1、“子宫”平滑肌瘤。 2、送检破碎子宫内膜呈增生期图像伴息肉样改变。 3、“右”卵巢黄体囊肿伴冠囊肿。							1258122		40	2	0	1	2	3	0				159	56	22.151				0.7	40.2		7.2		4.96	2.87	0.46	1.60	0	0	109	245	0	9.8
331021-60254412	1572143	苏*娣							1、“子宫”平滑肌瘤，灶区黏液变性。 2、“双侧输卵管系膜”副中肾管囊肿，另见少量输卵管组织。							1572143		38	2	0	2	2	4	0				153	60	25.6312			1.41	1.9	11.2		11.8		4.47	1.98	0.3	2.11	1	0	124	236	0	11.7
330381-0075513565	1596184	陈*初							子宫+双侧输卵管切除标本： 1、子宫多发平滑肌瘤灶区玻璃样变性。 2、宫颈慢性炎伴鳞化及纳氏囊肿形成。 3、分泌期宫内膜。 4、双侧输卵管未见特异。							1596184		45	1	0	3	1	4	0				157	55	22.3133					25.8		6.5		4.52	2.23	0.26	1.90	1	0	118	249	0	10.0
330382-0000944072	1411570	陈*萍							1、子宫内膜息肉；分泌期宫内膜。 2、“子宫”平滑肌瘤 3、“右”输卵管符合积水扩张							1411570		46	2	0	0	2	2	0				148	56	25.5661			1.74	1.7	8.0		13.8		6.11	3.47	0.36	2.02	1	0	130	334	0	9.9
0070348442	1448509	黄*英							全子宫+左附件+右侧输卵管： 1、子宫多发性平滑肌瘤。 2、子宫内膜息肉。 3、“宫颈管”息肉。 4、宫颈慢性炎。 5、增生期宫内膜。 6、“左”卵巢黄体囊肿。 7、“左、右”输卵管未见特异，“左”输卵管系膜副中肾管囊肿。							1448509		52	2	0	0	2	2	0				157	72.5	29.413			2.54	1.5			17.7		3.34	2.01	0.28	1	0	2	86	204	0	9.4
330381-0075533100	1544265	章*飞							子宫+双输卵管切除标本： 1、子宫平滑肌瘤（灶区富细胞性）。 2、宫颈慢性炎。 3、萎缩性宫内膜。 4、两侧输卵管未见特异。 5、宫腔内见部分血性液伴少量蜕膜样间质成分，请结合临床。							1544265		48	2	0	3	2	5	0				158	60	24.0346			1.85	1.2	34.5		14.1		5.3	2.86	0.3	2.09	1	0	129	290	0	10.3
330327-1001083081	1387165	杨*真							1.子宫平滑肌瘤。 2.宫颈慢性炎。 3.宫颈管息肉。 4.分泌期宫内膜。 5.“右”卵巢滤泡性囊肿。 6.双侧输卵管积水。							1387165		47	1	0	1	1	2	0				162	65	24.7676			1.91	0.5	10.8		5.6		7.12	4.74	0.47	1.76	0	0	80	330	0
330328-1001426555	1687773	吴*芬							1、“子宫”平滑肌瘤。 2、“双侧输卵管系膜”副中肾管囊肿。							1687773		37	2	0	1	2	3	0				160	67	26.1719			5	2.5	11.8		3.1		3.76	2.07	0.28	1.36	0	1	133	229	0	8.9
331100-1001433836	1695568	周*珠							1、“子宫肌瘤”平滑肌瘤。 2、“子宫内膜及息肉”符合子宫内膜息肉，腺体呈分泌期图像。							1695568		44	2	0	1	2	3	0				160	50	19.5312			4.05	1.4	12.2		5.7		5.3	4.3	0.16	0.82	0	2	153	235	0	10.7
330324-76360	867339	唐*平							1.全子宫+双侧输卵管切除标本： （1）子宫平滑肌瘤伴玻璃样变性； （2）分泌期宫内膜； （3）宫颈慢性炎； （4）双侧输卵管系膜副中肾管囊肿。 2.“外阴皮赘”皮内痣。 3.“阴道结节”纤维上皮性息肉。 4.“右侧卵巢囊肿”黄体囊肿。							867339		47	1	0	2	1	3	0				161	55	21.2183			3.3	2.1	67		12.3	0.8	5.65	2.18	0.76	2.5	1	0	121	308	0	10.1
0077653037	1412062	徐*冬																42	2	0	1	2	3	0											7.9				5.31	2.56	0.49	2.13	1	0	125	164	0
00019500375107	1580530	刘*燕																38	2	0	0	2	2	0											14.9				8.53	5.21	0.86	2.35	1	0	108	412	1
330382-0080286841	1517120	高*																44	2	0	1	2	3	0											7.6				4.34	2.45	0.28	1.52	0	1	101	275	0
330324-1000513914	1588614	陈*燕																39	2	0	3	2	5	0											129.6				6.7	4.22	0.41	1.91	1	0	105	320	0
330381-0001651351	1567141	黄*民																36	2	0	0	2	2	0											16.7				7.64	5.14	0.59	1.79	0	0	126	272	0
0076008268	1639406	夏*珍																35	1	0	2	1	3	0											26.8				7.04	4.27	0.49	2.18	1	0	117	347	0
330327-1000571868	1389595	尤*西																45	2	0	1	2	3	0											6.3				5.24	3.46	0.28	1.47	0	1	81	302	0
330329-1000455871	1418309	唐*春																38	2	0	1	2	3	0											14.6				5.87	3.07	0.51	2.13	1	0	90	329	0
330328-1001277670	1323626	王*青																52	3	0	0	3	3	0											8.4				4.44	1.67	0.51	2.16	1	0	122	258	0
0075231711	1598872	叶*萍																43	2	0	2	2	4	0											12.7				3.77	1.87	0.23	1.64	0	0	109	278	0
330327-1001081640	1552998	林*燕																48	2	0	0	2	2	0											27.9				8.28	5.65	0.52	2.06	1	0	132	312	0
[truncated: 15 more columns]
